# Supplementary material for: Gene Expression Linked to Reepithelialization of Human Skin Wounds
Source: MDPI journal article supplement (doi:10.3390/ijms232415746), 2022-12-12
Supplement: s1 [file s1]

**Figure S3.** Effect of rhIL-6 and rhIL-1 $\beta$  on *MMP3* mRNA levels in NHEKs and NHDFs.

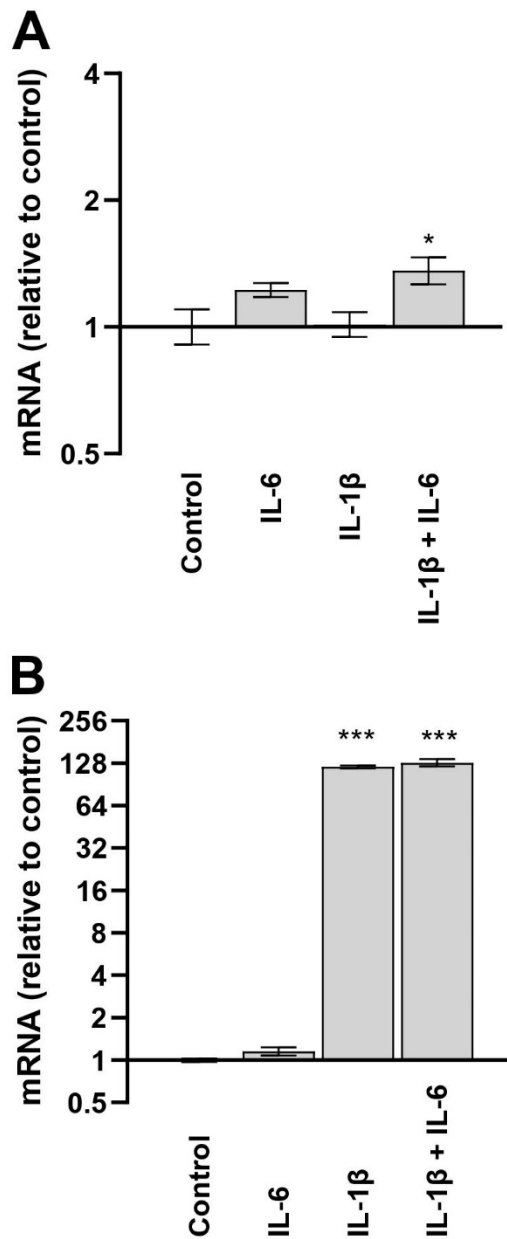

**Figure S3.** Effect of rhIL-6 (30 ng/mL) and rhIL-1 $\beta$  (1 ng/mL) treatment of NHEKs (A) and NHDFs (B) for 24 h on *MMP3* mRNA. mRNA levels were normalized to *RPLP0*, expressed as fold change relative to control-treated NHEKs and NHDFs. The geometric mean  $\pm$  back-transformed SEM of 6 replicates is shown. \* $p < 0.05$ , \*\*\*  $p < 0.001$  vs. control.
