# Supplementary material for: Gene Expression Linked to Reepithelialization of Human Skin Wounds
Source: MDPI journal article supplement (doi:10.3390/ijms232415746), 2022-12-12
Supplement: s1 [file s1]

**Figure S2.** Effect of rhIL-6 and rhIL-1 $\beta$  on BrdU incorporation in NHDFs.

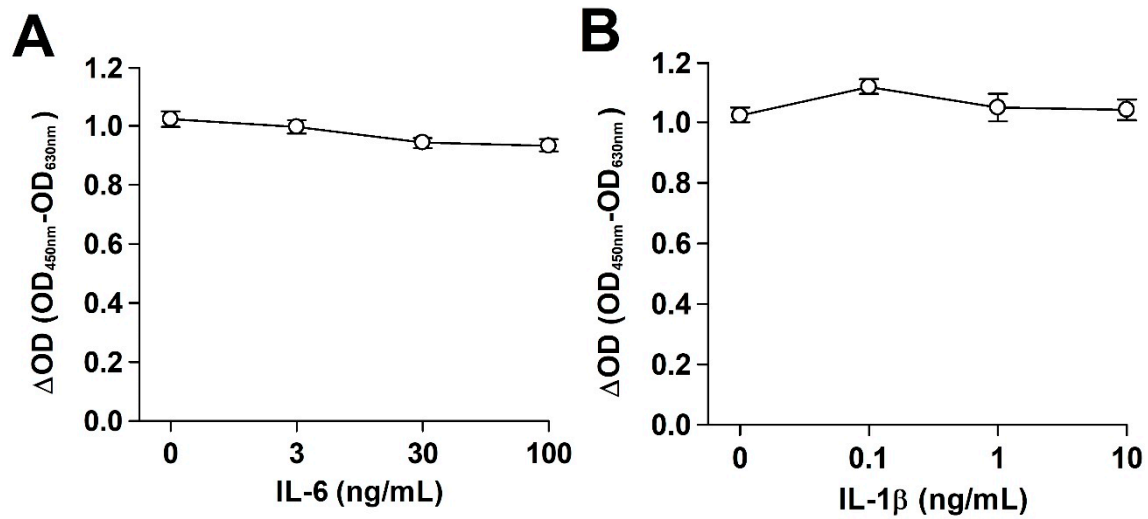

**Figure S2.** Effect of rhIL-6 (A) and rhIL-1 $\beta$  (B) at the indicated concentration on BrdU incorporation in NHDFs. Cells were seeded into 96-well plates (TPP®, Trasadingen, Switzerland) at  $1 \times 10^4$  cells per well in complete culture medium and incubated for 72 h. The medium was then replaced with 100  $\mu$ L DMEM medium with 2.5% FBS and the cells were incubated for another 24 h. IL-6 and IL-1 $\beta$  in 25  $\mu$ L DMEM with 1 mg/mL BSA were added and cells were incubated for a total of 20 h. After 16 h, 10  $\mu$ L of BrdU (10  $\mu$ M, final concentration) was added to each well, except for the background control, to which 10  $\mu$ L of DMEM alone was added and the cells were incubated for another 4 h. The amount of BrdU incorporation was measured with Roche Cell Proliferation ELISA, BrdU (Cat. No. 11647229001, Sigma-Aldrich, St. Louis, MO, USA). The cells were then washed three times with PBS, fixed, and incubated with a mouse monoclonal anti-BrdU antibody conjugated with peroxidase (1:50 dilution) for 90 min at 37 °C according to the manufacturer's instructions. The immune complex was detected by 100  $\mu$ L of tetramethyl-benzidine substrate (TMB ONE; Kem-En-Tec Diagnostics, Taastrup, Denmark), and the reaction stopped after 20 min incubation by the addition of 100  $\mu$ L of 0.2 M H<sub>2</sub>SO<sub>4</sub>. OD<sub>450nm</sub> and OD<sub>630nm</sub> were measured with a microplate reader (800 TS, BioTek Instruments, Winooski, VT, USA). The mean  $\pm$  SEM of 8 replicates is shown.
