# Supplementary material for: Gene Expression Linked to Reepithelialization of Human Skin Wounds
Source: MDPI journal article supplement (doi:10.3390/ijms232415746), 2022-12-12
Supplement: s1 [file s1]

**Figure S1.** *IL1B* and *IL6* mRNA Correlation.

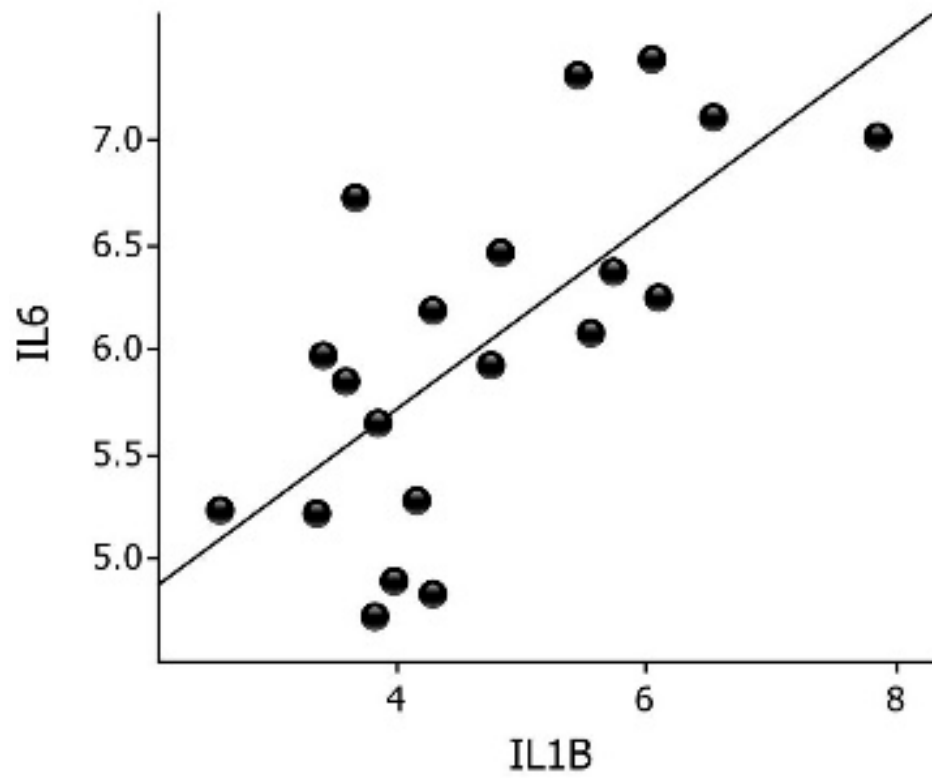

**Figure S1.** Correlation between *IL1B* and *IL6* mRNA levels in wounds ( $n = 20$ ). Pearson correlation coefficient:  $r = 0.69$  ( $p < 0.001$ ). Log2-transformed expression values are shown on the y- and x-axes.
