# Supplementary material for: Gene Expression Linked to Reepithelialization of Human Skin Wounds
Source: Int J Mol Sci. 2022 Dec 12;23(24):15746. doi: 10.3390/ijms232415746 (PMC9779194; doi:10.3390/ijms232415746)
Supplement: Supplementary file 1 [file ijms-23-15746-s001.zip]

Archive with 7 entries (7 files):
- Figure S1.pdf
- Figure S2.pdf
- Figure S3.pdf
- Table S1. Raw nCounter Data.xlsx
- Table S2. Processed Raw nCounter Data by nSolver.xlsx
- Table S3. Expression of All Genes in Wounds versus Skin..xlsx
- Table S4. nCounter CodeSet Design Report.xlsx
