# Supplementary material for: Gene Expression Linked to Reepithelialization of Human Skin Wounds
Source: Int J Mol Sci. 2022 Dec 12;23(24):15746. doi: 10.3390/ijms232415746 (PMC9779194; doi:10.3390/ijms232415746)
Supplement: Supplementary file 1 [file ijms-23-15746-s001.zip › Table S1. Raw nCounter Data.xlsx]

## Sheet: Raw Data
Probe Name	Accession #	NS Probe ID	Class Name	Analyte Type	Species Name	Target Sequence (5'®3')	Avg Count	Min Count	Max Count	20191024_208592140221_2_04.RCC	20191024_208592140221_2s_03.RCC	20191024_208592150221_10_08.RCC	20191024_208592150221_10s_07.RCC	20191024_208592150221_12_12.RCC	20191024_208592150221_12s_11.RCC	20191024_208592150221_7_02.RCC	20191024_208592150221_7s_01.RCC	20191029_208592120221_19_02.RCC	20191029_208592120221_19s_01.RCC	20191029_208592120221_23_10.RCC	20191029_208592120221_23s_09.RCC	20191029_208592130221_15_06.RCC	20191029_208592130221_15s_05.RCC	20191029_208592130221_17_10.RCC	20191029_208592130221_17s_09.RCC	20191029_208592200221_32_04.RCC	20191029_208592200221_32s_03.RCC	20191029_208592200221_33_06.RCC	20191029_208592200221_33s_05.RCC	20191029_208592200221_36_12.RCC	20191029_208592200221_36s_11.RCC	20191029_208592210221_27_06.RCC	20191029_208592210221_27s_05.RCC	20191030_208592160221_54_12.RCC	20191030_208592160221_54s_11.RCC	20191030_208592170221_56_04.RCC	20191030_208592170221_56s_03.RCC	20191030_208592170221_57_06.RCC	20191030_208592170221_57s_05.RCC	20191030_208592170221_59_10.RCC	20191030_208592170221_59s_09.RCC	20191030_208592180221_48_12.RCC	20191030_208592180221_48s_11.RCC	20191030_208592190221_37_02.RCC	20191030_208592190221_37s_01.RCC	20191030_208592190221_40_08.RCC	20191030_208592190221_40s_07.RCC	20191030_208592190221_41_10.RCC	20191030_208592190221_41s_09.RCC
										1 WOUND	1 SKIN	5 WOUND	5 SKIN	6 WOUND	6 SKIN	4 WOUND	4 Skin	11 WOUND	11 SKIN	10 WOUND	10 SKIN	9 WOUND	9 SKIN	8 WOUND	8 SKIN	16 WOUND	16 SKIN	17 WOUND	17 SKIN	18 WOUND	18 SKIN	14 WOUND	14 SKIN	27 WOUND	27 SKIN	28 WOUND	28 SKIN	29 WOUND	29 SKIN	30 WOUND	30 SKIN	24 WOUND	24 SKIN	19 WOUND	19 SKIN	20 WOUND	20 SKIN	21 WOUND	21 SKIN
																											FLAG	FLAG	FLAG		FLAG				FLAG		FLAG					FLAG	FLAG
ACTC1	NM_005159.4	NM_005159.4:2005	Endogenous	mRNA	Hs	GCTGACAGTTGGGCCAGCCACATCCCATTGCAAATACCCTCTAAACATATCAAGACCATTGTGTGTGTGCAAAACAAATGTGAGGAAGCAGGAGCCAAAC	1.4	1	4	1	1	1	1	1	3	1	2	2	2	1	1	2	1	4	4	2	1	1	1	1	1	1	1	1	1	1	1	2	1	1	1	1	1	1	1	1	1	2	2
ACVRL1	NM_000020.1	NM_000020.1:1710	Endogenous	mRNA	Hs	TCTGCCCGACTCACCGCGCTGCGGATCAAGAAGACACTACAAAAAATTAGCAACAGTCCAGAGAAGCCTAAAGTGATTCAATAGCCCAGGAGCACCTGAT	153.45	1	511	87	77	163	71	255	142	85	80	312	98	180	67	96	15	461	224	198	73	85	63	272	52	162	77	296	1	164	4	268	90	511	109	8	4	233	138	155	109	462	191
ADAM17	NM_003183.4	NM_003183.4:1595	Endogenous	mRNA	Hs	AGAACGCAGCAATAAAGTTTGTGGGAACTCGAGGGTGGATGAAGGAGAAGAGTGTGATCCTGGCATCATGTATCTGAACAACGACACCTGCTGCAACAGC	132.05	1	495	162	168	119	113	233	198	113	130	218	130	184	98	150	33	495	326	107	58	50	46	129	38	83	71	241	3	159	1	195	64	314	88	11	5	126	123	78	108	191	123
ADORA2A	NM_000675.3	NM_000675.3:1095	Endogenous	mRNA	Hs	TGGCCATCGTCCTCTCCCACACCAATTCGGTTGTGAATCCCTTCATCTACGCCTACCGTATCCGCGAGTTCCGCCAGACCTTCCGCAAGATCATTCGCAG	14.475	1	69	9	11	10	6	29	17	10	13	26	13	14	5	21	2	69	38	23	5	5	10	23	5	11	3	23	1	10	1	27	13	23	7	5	1	16	11	15	10	24	14
AGER	NM_001136.3	NM_001136.3:340	Endogenous	mRNA	Hs	GAAAGGAGACCAAGTCCAACTACCGAGTCCGTGTCTACCAGATTCCTGGGAAGCCAGAAATTGTAGATTCTGCCTCTGAACTCACGGCTGGTGTTCCCAA	7.675	1	30	3	8	5	8	19	13	7	5	18	14	10	3	8	2	30	17	10	6	5	1	11	3	5	3	8	1	10	1	10	4	12	4	2	1	8	10	5	6	5	6
ANGPT1	NM_001146.3	NM_001146.3:2080	Endogenous	mRNA	Hs	GTGGTAGTTATGTGAAGTCACCAAGGTTCTTGACCGTGAATCTGGAGCCGTTTGAGTTCACAAGAGTCTCTACTTGGGGTGACAGTGCTCACGTGGCTCG	10.3	1	42	7	7	10	13	18	11	9	11	34	7	20	8	15	1	26	11	8	4	3	4	14	2	5	10	26	2	9	1	19	3	42	3	1	1	17	12	2	3	7	6
BMP1	NM_001199.1	NM_001199.1:1305	Endogenous	mRNA	Hs	GCTTCTTTGCAGTCTACGAAGCCATCTGCGGGGGTGATGTGAAAAAGGACTATGGCCACATTCAATCGCCCAACTACCCAGACGATTACCGGCCCAGCAA	279.25	2	899	222	208	293	128	520	273	182	169	633	176	391	118	232	50	899	432	328	136	133	129	553	90	246	174	517	3	281	2	433	128	736	185	28	3	426	270	204	167	716	356
CCL2	NM_002982.3	NM_002982.3:123	Endogenous	mRNA	Hs	CATTCCCCAAGGGCTCGCTCAGCCAGATGCAATCAATGCCCCAGTCACCTGCTGTTATAACTTCACCAATAGGAAGATCTCAGTGCAGAGGCTCGCGAGC	235	1	1411	142	95	157	63	466	155	130	101	391	104	334	120	155	20	1411	607	478	87	122	68	224	27	132	55	326	2	124	1	588	140	877	169	35	5	213	100	166	147	620	243
CCL7	NM_006273.2	NM_006273.2:120	Endogenous	mRNA	Hs	CAGCCCCCAGGGGCTTGCTCAGCCAGTTGGGATTAATACTTCAACTACCTGCTGCTACAGATTTATCAATAAGAAAATCCCTAAGCAGAGGCTGGAGAGC	2.175	1	14	1	1	1	1	1	1	2	1	6	1	1	1	1	1	14	4	7	1	1	1	1	2	2	1	2	1	1	1	4	1	4	2	1	1	3	1	2	1	4	4
CD36	NM_000072.3	NM_000072.3:707	Endogenous	mRNA	Hs	AGCCAAGGAAAATGTAACCCAGGACGCTGAGGACAACACAGTCTCTTTCCTGCAGCCCAATGGTGCCATCTTCGAACCTTCACTATCAGTTGGAACAGAG	343.65	4	1590	248	152	668	243	432	319	137	218	811	128	268	104	187	12	576	528	182	108	98	126	855	79	183	97	983	12	614	4	1590	579	1440	279	16	4	206	146	140	182	434	358
CD40LG	NM_000074.2	NM_000074.2:1225	Endogenous	mRNA	Hs	GCATTTGATTTATCAGTGAAGATGCAGAAGGGAAATGGGGAGCCTCAGCTCACATTCAGTTATGGTTGACTCTGGGTTCCTATGGCCTTGTTGGAGGGGG	8.725	1	41	2	2	10	9	10	12	4	5	15	5	16	8	3	2	41	27	8	1	5	4	11	4	5	6	15	1	16	1	18	1	26	8	4	1	8	4	6	4	13	8
CD59	NM_000611.4	NM_000611.4:730	Endogenous	mRNA	Hs	GACTTGAACTAGATTGCATGCTTCCTCCTTTGCTCTTGGGAAGACCAGCTTTGCAGTGACAGCTTGAGTGGGTTCTCTGCAGCCCTCAGATTATTTTTCC	997.525	1	3047	1378	996	825	551	1806	1383	1011	804	3016	1021	1496	656	688	63	2455	1143	530	267	409	512	1048	191	488	390	2682	6	1184	1	1932	469	3047	512	72	12	1452	1095	683	765	1955	907
CDH1	NM_004360.2	NM_004360.2:535	Endogenous	mRNA	Hs	GAATTGCTCACATTTCCCAACTCCTCTCCTGGCCTCAGAAGACAGAAGAGAGACTGGGTTATTCCTCCCATCAGCTGCCCAGAAAATGAAAAAGGCCCAT	417.55	1	1270	447	644	153	361	513	900	529	560	482	483	505	378	511	61	1156	1270	416	375	153	291	354	165	312	416	372	1	315	3	320	241	440	536	47	13	305	627	230	519	668	630
COL1A1	NM_000088.3	NM_000088.3:5210	Endogenous	mRNA	Hs	CAGAAACATCGGATTTGGGGAACGCGTGTCAATCCCTTGTGCCGCAGGGCTGGGCGGGAGAGACTGTTCTGTTCCTTGTGTAACTGTGTTGCTGAAAGAC	2283.6	8	7154	1872	4186	1603	1674	3921	4928	1327	1380	4977	2288	1991	1238	1203	366	6765	7154	1242	1361	871	1511	3449	1278	2399	3261	2923	8	1937	8	2752	1528	4553	2570	115	21	1613	1944	1272	1290	3875	2690
COL3A1	NM_000090.3	NM_000090.3:180	Endogenous	mRNA	Hs	TTGGCACAACAGGAAGCTGTTGAAGGAGGATGTTCCCATCTTGGTCAGTCCTATGCGGATAGAGATGTCTGGAAGCCAGAACCATGCCAAATATGTGTCT	3114.45	2	13993	2813	4869	2610	1940	5317	6439	2517	2515	8420	3938	4509	2336	2991	431	13993	10717	1489	1636	650	979	2790	1229	1600	2571	6085	6	3346	2	3595	936	8364	1994	97	24	1045	1112	1341	1580	3120	2632
COL4A1	NM_001845.4	NM_001845.4:780	Endogenous	mRNA	Hs	TGGGCTTAAGTTTTCAAGGACCAAAAGGTGACAAGGGTGACCAAGGGGTCAGTGGGCCTCCAGGAGTACCAGGACAAGCTCAAGTTCAAGAAAAAGGAGA	1509.17	6	6564	1034	527	1240	534	3239	1134	1156	776	4093	641	2728	486	1313	209	6564	1862	2213	477	670	420	3319	277	1550	508	2405	12	1722	6	1528	604	5243	714	105	11	2386	968	1946	829	3671	1247
COL4A3	NM_000091.4	NM_000091.4:1084	Endogenous	mRNA	Hs	CTGGAAGTGAGGGAGTCAAGGGCAACAGGGGTTTCCCTGGGTTAATGGGTGAAGATGGCATTAAGGGACAGAAAGGGGACATTGGCCCTCCAGGATTTCG	2.275	1	15	1	2	2	1	1	1	1	1	9	2	1	1	1	1	3	3	2	1	1	1	2	1	1	2	6	1	1	1	7	2	15	1	1	1	2	3	4	2	1	1
COL5A2	NM_000393.3	NM_000393.3:4075	Endogenous	mRNA	Hs	GGTTCATGCTACCCTGAAGTCACTCAGTAGTCAGATTGAAACCATGCGCAGCCCCGATGGCTCGAAAAAGCACCCAGCCCGCACGTGTGATGACCTAAAG	131.575	1	629	101	104	96	74	223	150	85	102	357	85	133	60	130	10	629	368	161	50	46	51	244	32	128	107	215	1	128	1	153	72	316	75	10	2	117	102	117	70	211	147
COL5A3	NM_015719.3	NM_015719.3:5205	Endogenous	mRNA	Hs	TCGAATTCAGCTCTTCTCGAGCGGGATTTCTGCCCCTGTGGGATGTGGCGGCCACTGACTTTGGCCAGACGAACCAAAAGTTTGGGTTTGAACTGGGCCC	194.7	2	683	133	144	164	166	305	326	175	204	519	200	304	130	208	46	683	306	170	124	85	112	292	86	133	141	271	2	215	2	243	100	508	161	26	5	162	194	101	116	321	205
COL7A1	NM_000094.2	NM_000094.2:390	Endogenous	mRNA	Hs	GCTCTGGGGGTGATGTGATCCGCGCCATCCGTGAGCTTAGCTACAAGGGGGGCAACACTCGCACAGGGGCTGCAATTCTCCATGTGGCTGACCATGTCTT	935.4	1	2375	749	1272	367	1040	1017	2375	1384	1728	856	1112	878	618	963	486	2007	1708	1130	1174	445	885	1119	599	861	1122	686	1	805	4	740	669	1377	1374	115	23	640	1315	387	1013	1225	1147
COL14A1	NM_021110.1	NM_021110.1:1865	Endogenous	mRNA	Hs	CTTTAAGTCCACCAAGAAACCTGAGAATCTCCAATGTTGGCTCTAACAGTGCTCGATTAACCTGGGACCCAACTTCAAGACAGATCAATGGTTATCGAAT	64.275	1	209	45	88	81	40	107	159	38	50	147	69	107	46	23	4	191	163	28	29	18	24	64	24	50	70	160	2	50	1	67	33	209	58	4	1	66	52	14	40	76	73
COL17A1	NM_000494.3	NM_000494.3:5070	Endogenous	mRNA	Hs	TGACACTTGATGGGGGTGTGTTCTGGTTACTGTTCTAAGGCTGTGCCATCAGCTCCTTCCTCCCCTGTTCATTCTGCATTCTCTAGTCAGTTGGCTAAGA	657.45	1	1737	529	986	215	720	645	1675	997	1157	708	1119	814	535	801	87	1667	1737	636	635	275	490	700	441	378	683	484	2	544	1	556	394	766	884	92	19	451	793	285	706	802	889
CSF2	NM_000758.2	NM_000758.2:475	Endogenous	mRNA	Hs	AGATGAGGCTGGCCAAGCCGGGGAGCTGCTCTCTCATGAAACAAGAGCTAGAAACTCAGGATGGTCATCTTGGAGGGACCAAGGGGTGGGCCACAGCCAT	7.125	1	39	8	7	2	3	10	7	8	4	7	4	6	3	4	3	39	26	11	3	2	6	12	5	5	4	9	1	5	1	12	1	10	2	3	1	7	5	9	4	22	4
CSF2RA	NM_006140.3	NM_006140.3:660	Endogenous	mRNA	Hs	AGAAGGAGGGAGATCCGGTGTCCTTATTACATACAAGACTCAGGAACCCATGTGGGATGTCACCTGGATAACCTGTCAGGATTAACGTCTCGCAATTACT	76.825	4	550	63	52	46	29	108	82	57	44	152	53	72	37	90	21	550	227	63	37	28	21	86	13	49	34	142	8	122	6	132	28	153	22	14	4	78	32	50	45	148	75
CSF3	NM_000759.3	NM_000759.3:851	Endogenous	mRNA	Hs	CCTGCATTTCTGAGTTTCATTCTCCTGCCTGTAGCAGTGAGAAAAAGCTCCTGTCCTCCCATCCCCTGGACTGGGAGGTAGATAGGTAAATACCAAGTAT	2.4	1	17	1	1	1	1	5	3	3	1	6	1	1	1	1	1	17	3	6	1	1	1	1	1	3	2	4	1	3	1	4	1	4	1	1	1	2	1	2	1	3	3
CTGF	NM_001901.2	NM_001901.2:1100	Endogenous	mRNA	Hs	ACCACCCTGCCGGTGGAGTTCAAGTGCCCTGACGGCGAGGTCATGAAGAAGAACATGATGTTCATCAAGACCTGTGCCTGCCATTACAACTGTCCCGGAG	443.05	1	1959	343	245	458	192	736	275	265	131	692	191	953	166	478	37	1959	513	569	79	135	90	834	75	678	250	1444	4	708	1	438	156	1088	144	9	2	949	357	651	320	887	220
CTNNB1	NM_001098210.1	NM_001098210.1:1815	Endogenous	mRNA	Hs	TCTTGCCCTTTGTCCCGCAAATCATGCACCTTTGCGTGAGCAGGGTGCCATTCCACGACTAGTTCAGTTGCTTGTTCGTGCACATCAGGATACCCAGCGC	395.525	2	1563	457	428	314	245	661	540	309	331	959	427	645	250	413	35	1563	888	277	194	157	199	457	121	245	237	749	2	347	2	547	178	999	271	20	6	437	397	187	273	710	344
CTSG	NM_001911.2	NM_001911.2:160	Endogenous	mRNA	Hs	AGTCCAGCAGGTCAGAGCAGATGTGGAGGGTTCCTGGTGCGAGAAGACTTTGTGCTGACAGCAGCTCATTGCTGGGGAAGCAATATAAATGTCACCCTGG	130.9	1	589	135	95	155	67	226	100	81	48	459	130	146	43	103	11	368	223	92	42	44	48	113	26	87	64	482	1	146	1	122	34	589	101	7	2	292	180	68	64	169	72
CTSK	NM_000396.2	NM_000396.2:415	Endogenous	mRNA	Hs	TCTCATTCCCGCAGTAATGACACCCTTTATATCCCAGAATGGGAAGGTAGAGCCCCAGACTCTGTCGACTATCGAAAGAAAGGATATGTTACTCCTGTCA	1226.17	1	5288	849	877	869	675	1962	1223	973	681	2399	688	2095	494	1068	115	5288	2314	1417	570	432	434	1723	410	1249	928	2645	5	1176	1	1598	667	3738	794	58	12	1440	760	838	835	3234	1513
CTSV	NM_001333.3	NM_001333.3:2820	Endogenous	mRNA	Hs	GTGAAATTTAATCGAAAGGTGATCCATTGTGAATGCAATGGGAGGGAAGGGGCATGTGGGACTGTGTATCCCAAAAACCCTTTGATAGCCTATGTCCACA	26.575	1	84	73	84	16	24	46	48	29	40	18	14	26	8	24	6	51	35	20	21	14	9	18	1	22	20	63	1	17	2	58	23	35	25	7	3	17	28	11	37	48	21
CXCL1	NM_001511.1	NM_001511.1:742	Endogenous	mRNA	Hs	TATGTTAATATTTCTGAGGAGCCTGCAACATGCCAGCCACTGTGATAGAGGCTGGCGGATCCAAGCAAATGGCCAATGAGATCATTGTGAAGGCAGGGGA	84	2	907	37	36	30	16	167	66	105	32	99	21	125	37	61	5	907	231	156	15	10	10	25	6	23	11	93	2	62	4	423	27	167	22	13	4	28	6	36	33	124	85
CXCL2	NM_002089.3	NM_002089.3:854	Endogenous	mRNA	Hs	ATCACATGTCAGCCACTGTGATAGAGGCTGAGGAATCCAAGAAAATGGCCAGTGAGATCAATGTGACGGCAGGGAAATGTATGTGTGTCTATTTTGTAAC	70.05	1	408	83	40	48	26	208	70	53	23	191	31	144	73	51	6	408	76	77	8	8	8	73	11	16	8	220	1	236	1	219	18	134	10	14	2	26	6	37	18	81	39
CXCL5	NM_002994.3	NM_002994.3:250	Endogenous	mRNA	Hs	AGAGAGCTGCGTTGCGTTTGTTTACAGACCACGCAAGGAGTTCATCCCAAAATGATCAGTAATCTGCAAGTGTTCGCCATAGGCCCACAGTGCTCCAAGG	13.5	1	169	5	4	3	1	2	2	6	3	6	1	11	1	9	1	169	26	129	1	2	1	6	2	14	5	6	1	7	1	39	6	2	1	3	2	20	4	10	4	23	1
CXCL8	NM_000584.2	NM_000584.2:25	Endogenous	mRNA	Hs	ACAGCAGAGCACACAAGCTTCTAGGACAAGAGCCAGGAAGAAACCACCGGAAGGAACCATCTCACTGTGTGTAAACATGACTTCCAAGCTGGCCGTGGCT	83.7	1	1466	31	21	31	10	104	31	31	12	97	6	103	14	49	2	1466	161	138	1	8	3	58	5	127	5	88	2	45	1	211	19	33	4	32	3	122	19	46	42	143	24
CXCL11	NM_005409.4	NM_005409.4:282	Endogenous	mRNA	Hs	TTCAAAAGAGGACGCTGTCTTTGCATAGGCCCTGGGGTAAAAGCAGTGAAAGTGGCAGATATTGAGAAAGCCTCCATAATGTACCCAAGTAACAACTGTG	4.825	1	19	2	3	4	8	5	8	6	5	2	3	4	3	7	1	19	12	3	2	1	1	3	1	6	3	1	1	13	1	19	8	10	2	1	1	7	2	6	1	5	3
CYR61	NM_001554.3	NM_001554.3:1390	Endogenous	mRNA	Hs	AAGGGAGAAGAGTGTCAGAATCAGAATCATGGAGAAAATGGGCGGGGGTGGTGTGGGTGATGGGACTCATTGTAGAAAGGAAGCCTTGCTCATTCTTGAG	1066.95	5	4822	873	408	954	346	1754	652	854	418	2038	415	2782	470	965	76	4822	1110	2256	219	599	280	1746	153	1125	478	2491	10	1548	5	2462	557	3707	445	69	14	1157	324	1393	478	1717	508
DEFB4	NM_004942.2	NM_004942.2:97	Endogenous	mRNA	Hs	TTTTTGGTGGTATAGGCGATCCTGTTACCTGCCTTAAGAGTGGAGCCATATGTCATCCAGTCTTTTGCCCTAGAAGGTATAAACAAATTGGCACCTGTGG	316.1	1	2613	363	287	15	27	269	244	293	248	193	102	1118	210	165	5	2404	2613	274	30	24	13	25	7	80	86	58	1	97	1	427	84	47	10	294	65	18	11	730	600	278	828
EGF	NM_001963.4	NM_001963.4:1022	Endogenous	mRNA	Hs	GGAGTGAAGGCTCTGTTGGAGACATCAGAGAAAATAACAGCTGTGTCATTGGATGTGCTTGATAAGCGGCTGTTTTGGATTCAGTACAACAGAGAAGGAA	3.825	1	10	2	7	1	4	6	7	6	1	6	4	7	1	1	2	7	7	6	3	3	3	5	4	1	2	5	2	3	2	10	2	6	2	1	1	3	3	5	3	6	3
EGFR	NM_201282.1	NM_201282.1:1354	Endogenous	mRNA	Hs	ACATCCTGCCGGTGGCATTTAGGGGTGACTCCTTCACACATACTCCTCCTCTGGATCCACAGGAACTGGATATTCTGAAAACCGTAAAGGAAATCACAGG	161.275	1	377	156	260	119	183	212	365	160	213	196	173	137	103	159	25	377	350	135	104	58	95	203	80	103	112	243	1	150	2	205	101	288	207	10	4	145	219	86	194	292	226
EGR1	NM_001964.2	NM_001964.2:1505	Endogenous	mRNA	Hs	GAGGCATACCAAGATCCACTTGCGGCAGAAGGACAAGAAAGCAGACAAAAGTGTTGTGGCCTCTTCGGCCACCTCCTCTCTCTCTTCCTACCCGTCCCCG	240.3	2	951	188	123	144	91	414	343	198	121	583	159	528	127	113	11	951	423	505	113	140	53	405	37	162	85	240	2	363	4	491	118	916	213	32	9	134	103	249	128	423	170
ENTPD1	NM_001098175.1	NM_001098175.1:795	Endogenous	mRNA	Hs	CCCATATGAAACCAATAATCAGGAAACCTTTGGAGCTTTGGACCTTGGGGGAGCCTCTACACAAGTCACTTTTGTACCCCAAAACCAGACTATCGAGTCC	153.075	1	646	132	81	176	68	324	157	104	102	271	87	168	50	95	20	646	420	99	47	60	60	155	23	106	71	390	1	145	1	229	70	505	86	7	1	211	134	145	113	373	190
EREG	NM_001432.2	NM_001432.2:290	Endogenous	mRNA	Hs	GAGAGTCCAGTGATAACTGCACAGCTTTAGTTCAGACAGAAGACAATCCACGTGTGGCTCAAGTGTCAATAACAAAGTGTAGCTCTGACATGAATGGCTA	25.85	1	151	27	50	15	17	19	40	24	32	33	39	48	14	25	3	151	107	19	8	8	20	19	4	8	17	35	1	32	1	28	6	36	15	3	1	17	18	11	19	28	36
F3	NM_001993.3	NM_001993.3:1030	Endogenous	mRNA	Hs	GAGCTGGAAGGAGAACTCCCCACTGAATGTTTCATAAAGGAAGCACTGTTGGAGCTACTGCAAATGCTATATTGCACTGTGACCGAGAACTTTTAAGAGG	101.85	2	555	86	109	62	72	172	237	139	108	124	102	139	65	111	10	555	139	73	50	40	51	107	25	58	89	123	2	84	2	125	46	138	84	19	4	94	89	59	76	311	95
F5	NM_000130.2	NM_000130.2:5810	Endogenous	mRNA	Hs	GAGACTGTAGGATGCCAATGGGACTAAGCACTGGTATCATATCTGATTCACAGATCAAGGCTTCAGAGTTTCTGGGTTACTGGGAGCCCAGATTAGCAAG	5.65	1	20	9	3	4	4	11	9	3	2	19	5	11	8	8	2	20	15	4	5	5	1	8	1	1	2	2	1	6	1	4	1	7	4	2	1	6	10	3	2	10	6
F13A1	NM_000129.3	NM_000129.3:3196	Endogenous	mRNA	Hs	TTCAGGTCCCCTTTCAGAGATATAATAAGCCCAACAAGTTGAAGAAGCTGGCGGATCTAGTGACCAGATATATAGAAGGACTGCAGCCACTGATTCTCTC	904.775	1	3507	645	571	956	425	1673	837	480	508	1732	593	999	356	458	70	3507	2414	776	328	277	274	1367	259	545	473	2444	4	991	1	1817	433	3168	425	14	5	1146	529	760	609	2272	1050
FGF2	NM_002006.4	NM_002006.4:620	Endogenous	mRNA	Hs	GTCCGGGAGAAGAGCGACCCTCACATCAAGCTACAACTTCAAGCAGAAGAGAGAGGAGTTGTGTCTATCAAAGGAGTGTGTGCTAACCGTTACCTGGCTA	41.425	1	220	38	20	52	25	68	44	16	14	133	33	41	13	42	9	220	52	29	11	9	20	65	4	23	13	135	3	43	1	67	15	106	16	5	1	79	52	27	18	73	22
FGF7	NM_002009.3	NM_002009.3:190	Endogenous	mRNA	Hs	GAAAGGCTCAAGTTGCACCAGGCAGACAACAGACATGGAATTCTTATATATCCAGCTGTTAGCAACAAAACAAAAGTCAAATAGCAAACAGCGTCACAGC	98.1	1	491	89	68	135	36	227	82	41	29	235	56	109	23	48	7	433	158	84	18	57	33	169	11	51	31	280	1	136	2	153	36	491	43	2	1	130	58	43	35	203	80
FGF10	NM_004465.1	NM_004465.1:85	Endogenous	mRNA	Hs	TGGTGTCTTCCGTCCCTGTCACCTGCCAAGCCCTTGGTCAGGACATGGTGTCACCAGAGGCCACCAACTCTTCTTCCTCCTCCTTCTCCTCTCCTTCCAG	20.175	1	81	19	12	38	13	54	23	8	8	43	14	10	7	7	7	33	7	9	3	16	23	51	2	13	15	56	1	41	2	18	10	81	23	1	1	26	30	13	13	38	18
FLG1	NM_002016.1	NM_002016.1:11786	Endogenous	mRNA	Hs	TGTACAGTCAGACTCTAGTACCGCTAAGGAACATGGTCACTTTAGTAGTCTTTCACAAGATTCTGCGTATCACTCAGGAATACAGTCACGTGGCAGTCCT	415.125	1	1343	230	701	75	504	297	1343	512	1208	299	788	870	580	554	26	642	954	409	442	78	267	447	196	192	718	332	1	492	1	473	294	638	509	4	2	139	275	82	312	44	675
FLG2	NM_001014342.2	NM_001014342.2:790	Endogenous	mRNA	Hs	CTGTCATGTGGATTGGAGACTAGTGGGCATGAATCAAACTCTACTCAGTCAAGAATTAGAGAACAAAAGCTTGGGTCTAGCTGTTCAGGTTCAGGAGACA	740.35	4	1955	562	1311	145	912	350	1955	979	1845	336	1312	930	808	687	93	838	1709	759	1101	239	670	801	530	379	1302	352	9	535	4	602	770	923	1584	26	16	367	933	239	1103	270	1328
FN1	NM_212482.1	NM_212482.1:1776	Endogenous	mRNA	Hs	GGGAATGGACATGCATTGCCTACTCGCAGCTTCGAGATCAGTGCATTGTTGATGACATCACTTACAATGTGAACGACACATTCCACAAGCGTCATGAAGA	214.875	1	863	178	152	254	131	375	217	117	125	516	205	351	88	202	18	863	416	212	71	68	79	363	69	154	111	538	4	263	1	308	103	582	141	10	1	277	230	127	112	390	173
GNAQ	NM_002072.2	NM_002072.2:1100	Endogenous	mRNA	Hs	AAGGAGTACAATCTGGTCTAATTGTGCCTCCTAGACACCCGCCCTGCCCTTCCCTGGTGGGCTATTGAAGATACACAAGAGGGACTGTATTTCTGTGGAA	138.75	1	506	110	94	129	93	269	190	109	97	300	112	175	72	112	9	506	275	125	55	40	41	196	30	98	75	307	1	171	1	205	73	413	111	7	1	196	104	103	95	307	143
HBEGF	NM_001945.1	NM_001945.1:475	Endogenous	mRNA	Hs	TGAGAGTCACTTTATCCTCCAAGCCACAAGCACTGGCCACACCAAACAAGGAGGAGCACGGGAAAAGAAAGAAGAAAGGCAAGGGGCTAGGGAAGAAGAG	31	1	168	50	32	26	10	49	28	45	9	27	15	62	7	38	4	168	31	62	7	13	5	28	5	23	12	58	1	34	1	56	11	65	10	8	3	25	15	38	18	114	27
HGF	NM_000601.4	NM_000601.4:550	Endogenous	mRNA	Hs	TCATTGGTAAAGGACGCAGCTACAAGGGAACAGTATCTATCACTAAGAGTGGCATCAAATGTCAGCCCTGGAGTTCCATGATACCACACGAACACAGCTT	20.7	1	108	10	12	22	15	49	19	22	13	52	21	17	15	14	1	108	25	33	3	8	13	21	3	16	4	49	1	22	1	37	9	78	10	2	1	26	10	10	8	38	10
HIF1A	NM_001530.2	NM_001530.2:1985	Endogenous	mRNA	Hs	ATGGATGATGACTTCCAGTTACGTTCCTTCGATCAGTTGTCACCATTAGAAAGCAGTTCCGCAAGCCCTGAAAGCGCAAGTCCTCAAAGCACAGTTACAG	537.8	1	2771	699	490	402	156	1143	647	427	252	1064	269	887	279	591	28	2771	1085	598	163	247	181	496	86	351	189	1084	5	627	1	747	205	1637	262	29	8	768	408	445	243	1142	400
IFNG	NM_000619.2	NM_000619.2:970	Endogenous	mRNA	Hs	ATACTATCCAGTTACTGCCGGTTTGAAAATATGCCTGCAATCTGAGCCAGTGCTTTAATGGCATGTCAGACAGAACTTGAATGTGTCAGGTGACCCTGAT	3.45	1	11	7	5	3	3	4	4	3	2	8	1	9	3	3	1	11	9	2	3	3	1	3	1	4	2	4	2	1	1	3	4	3	4	2	1	4	1	4	2	2	5
IGF1	NM_000618.3	NM_000618.3:491	Endogenous	mRNA	Hs	CGTGGATGAGTGCTGCTTCCGGAGCTGTGATCTAAGGAGGCTGGAGATGTATTGCGCACCCCTCAAGCCTGCCAAGTCAGCTCGCTCTGTCCGTGCCCAG	208.25	1	976	213	110	302	81	391	137	88	75	681	112	192	67	45	24	823	297	217	59	160	72	391	25	114	86	590	1	145	2	154	69	976	144	1	1	439	198	143	104	445	156
IL1A	NM_000575.3	NM_000575.3:1085	Endogenous	mRNA	Hs	ACTCCATGAAGGCTGCATGGATCAATCTGTGTCTCTGAGTATCTCTGAAACCTCTAAAACATCCAAGCTTACCTTCAAGGAGAGCATGGTGGTAGTAGCA	6.475	1	43	7	11	4	2	16	9	7	2	8	4	10	3	6	1	43	24	7	2	3	1	2	1	1	1	7	1	3	1	8	4	9	6	1	1	3	2	2	4	22	10
IL1B	NM_000576.2	NM_000576.2:840	Endogenous	mRNA	Hs	GGGACCAAAGGCGGCCAGGATATAACTGACTTCACCATGCAATTTGTGTCTTCCTAAAGAGAGCTGTACCCAGAGAGTCCTGTGCTGAATGTGGACTCAA	61.7	1	1226	21	19	20	4	50	31	26	5	44	6	65	19	36	4	1226	181	115	7	5	4	26	4	52	10	75	2	20	1	110	16	38	7	9	3	24	7	34	18	102	22
IL2	NM_000586.2	NM_000586.2:300	Endogenous	mRNA	Hs	AGGATGCAACTCCTGTCTTGCATTGCACTAAGTCTTGCACTTGTCACAAACAGTGCACCTACTTCAAGTTCTACAAAGAAAACACAGCTACAACTGGAGC	2.1	1	8	5	1	1	1	1	1	2	3	1	4	4	1	5	1	8	5	2	1	1	1	1	2	1	1	2	1	1	1	1	1	3	1	1	1	3	2	3	3	3	3
IL4	NM_000589.2	NM_000589.2:625	Endogenous	mRNA	Hs	GACACTCGCTGCCTGGGTGCGACTGCACAGCAGTTCCACAGGCACAAGCAGCTGATCCGATTCCTGAAACGGCTCGACAGGAACCTCTGGGGCCTGGCGG	1.45	1	5	1	2	1	1	1	1	2	1	5	2	1	1	2	1	3	2	1	1	1	1	1	1	1	1	3	1	1	1	1	1	2	1	1	1	1	4	1	2	1	1
IL6	NM_000600.3	NM_000600.3:364	Endogenous	mRNA	Hs	GGCACTGGCAGAAAACAACCTGAACCTTCCAAAGATGGCTGAAAAAGATGGATGCTTCCAATCTGGATTCAATGAGGAGACTTGCCTGGTGAAAATCATC	79.2	1	702	90	13	35	6	178	32	46	10	328	19	192	12	51	5	702	60	170	4	21	7	81	8	58	10	164	1	63	1	169	26	209	8	19	1	49	8	115	24	146	27
IL6ST	NM_002184.2	NM_002184.2:2505	Endogenous	mRNA	Hs	CAAAACACTTCGAGCACTGTCCAGTATTCTACCGTGGTACACAGTGGCTACAGACACCAAGTTCCGTCAGTCCAAGTCTTCTCAAGATCCGAGTCTACCC	436.3	3	1556	320	266	425	257	763	594	296	299	870	371	600	234	306	47	1556	866	368	205	146	183	639	126	284	252	953	3	548	3	765	282	1360	345	27	9	561	333	353	289	883	465
IL10	NM_000572.2	NM_000572.2:230	Endogenous	mRNA	Hs	AAGGATCAGCTGGACAACTTGTTGTTAAAGGAGTCCTTGCTGGAGGACTTTAAGGGTTACCTGGGTTGCCAAGCCTTGTCTGAGATGATCCAGTTTTACC	6.75	1	39	5	6	5	3	11	5	4	4	15	1	11	4	12	3	39	20	6	3	3	3	7	3	3	4	10	1	8	1	12	2	19	2	1	1	6	4	4	3	11	5
ITGA1	NM_181501.1	NM_181501.1:1875	Endogenous	mRNA	Hs	AAGTGGCAAGACTATAAGGAAAGAGTATGCACAACGTATTCCATCAGGTGGGGATGGTAAGACACTGAAATTTTTTGGCCAGTCTATCCACGGAGAAATG	61.35	1	244	42	34	86	33	143	66	23	39	153	45	98	42	41	9	244	93	45	20	25	17	66	16	66	32	168	2	74	1	95	26	218	37	3	1	65	50	52	34	94	56
ITGA2	NM_002203.2	NM_002203.2:475	Endogenous	mRNA	Hs	CAACGGGTGTGTGTTCTGACATCAGTCCTGATTTTCAGCTCTCAGCCAGCTTCTCACCTGCAACTCAGCCCTGCCCTTCCCTCATAGATGTTGTGGTTGT	65.225	1	177	76	84	32	55	96	144	84	97	94	66	94	52	64	8	177	133	48	69	38	75	80	45	46	55	49	2	51	1	66	40	137	102	7	6	30	87	34	51	78	56
ITGA3	NM_002204.2	NM_002204.2:1116	Endogenous	mRNA	Hs	ACAACTGGAAAGGAAACAGCTACATGATTCAGCGCAAGGAGTGGGACTTATCTGAGTATAGTTACAAGGACCCAGAGGACCAAGGAAACCTCTATATTGG	145.875	1	578	193	151	85	88	240	216	269	139	253	145	285	68	228	14	578	272	138	58	52	48	140	45	90	73	238	2	177	1	191	62	289	66	19	5	129	92	110	97	369	120
ITGA4	NM_000885.4	NM_000885.4:975	Endogenous	mRNA	Hs	GCCCACTGCCAACTGGCTCGCCAACGCTTCAGTGATCAATCCCGGGGCGATTTACAGATGCAGGATCGGAAAGAATCCCGGCCAGACGTGCGAACAGCTC	44.925	1	239	22	25	58	21	59	32	36	19	93	13	63	18	35	9	239	129	54	15	19	7	56	13	38	25	81	1	61	1	72	19	128	27	5	1	43	17	35	24	123	61
ITGA5	NM_002205.2	NM_002205.2:4113	Endogenous	mRNA	Hs	GCCAGCTGCACTGATGCTGCCCCTCATCTCTCTGCCCAACCCTTCCCTCACCTTGGCACCAGACACCCAGGACTTATTTAAACTCTGTTGCAAGTGCAAT	337.275	1	1187	235	132	289	174	711	326	209	148	615	187	469	109	288	69	1187	446	502	143	173	113	676	85	289	130	530	1	341	1	558	258	1086	224	24	3	528	256	371	175	1049	381
ITGA6	NM_000210.1	NM_000210.1:3065	Endogenous	mRNA	Hs	CTCATGCGAGCCTTCATTGATGTGACTGCTGCTGCCGAAAATATCAGGCTGCCAAATGCAGGCACTCAGGTTCGAGTGACTGTGTTTCCCTCAAAGACTG	287.175	3	1358	345	282	166	190	531	518	401	275	519	333	629	226	461	34	1358	583	238	99	97	112	236	75	166	139	377	3	294	3	268	63	588	150	48	8	256	252	125	187	612	240
ITGAV	NM_002210.2	NM_002210.2:2615	Endogenous	mRNA	Hs	TTTCTTCCGATTCCAAACTGGGAGCACAAGGAGAACCCTGAGACTGAAGAAGATGTTGGGCCAGTTGTTCAGCACATCTATGAGCTGAGAAACAATGGTC	186.45	1	883	186	187	155	165	304	317	167	194	395	177	283	107	199	41	883	463	137	90	65	71	200	68	101	96	425	2	205	3	249	69	458	97	8	1	152	145	79	120	251	143
ITGB1	NM_002211.3	NM_002211.3:355	Endogenous	mRNA	Hs	TGGGTGGTGCACAAATTCAACATTTTTACAGGAAGGAATGCCTACTTCTGCACGATGTGATGATTTAGAAGCCTTAAAAAAGAAGGGTTGCCCTCCAGAT	340.425	2	1327	223	172	285	129	662	411	318	203	786	271	622	172	365	6	1327	612	383	131	165	143	468	93	271	171	593	2	343	3	451	162	1033	253	37	7	473	258	243	180	826	364
ITGB3	NM_000212.2	NM_000212.2:4485	Endogenous	mRNA	Hs	GAATAAGCCTTGGAATTAGATATGGGGCAATGACTGAGCCCTGTCTCACCCATGGATTACTCCTTACTGTAGGGAATGGCAGTATGGTAGAGGGATAAAT	96.85	1	427	79	39	73	33	213	95	57	40	295	53	173	41	100	13	427	140	127	25	31	15	138	21	53	21	243	3	99	1	153	40	362	34	10	1	161	47	77	41	221	79
ITGB5	NM_002213.3	NM_002213.3:2560	Endogenous	mRNA	Hs	CAAAGTTTCAGAGCGAGCGATCCAGGGCCCGCTATGAAATGGCTTCAAATCCATTATACAGAAAGCCTATCTCCACGCACACTGTGGACTTCACCTTCAA	361.775	2	1021	351	335	318	231	537	478	273	278	626	266	427	157	328	47	1021	624	382	223	211	214	679	167	303	300	544	2	355	2	434	222	925	348	24	4	686	410	236	229	863	411
ITGB6	NM_000888.3	NM_000888.3:1090	Endogenous	mRNA	Hs	AACATTCTCCAGCTGATCATCTCAGCTTATGAAGAACTGCGGTCTGAGGTGGAACTGGAAGTATTAGGAGACACTGAAGGACTCAACTTGTCATTTACAG	5.75	1	19	6	11	8	3	10	15	7	5	18	4	6	2	10	1	19	11	7	3	1	3	4	2	5	2	5	1	5	2	9	3	10	4	1	1	6	7	3	1	6	3
IVL	NM_005547.2	NM_005547.2:1860	Endogenous	mRNA	Hs	CTGGCTCCACTTATTTCGGGTCCGCTAGGTGGCCCGTCTCATCTGTGAACTTGACTCTGTCCCTCTACATGTCTCTTTAATGGGGTGAGGGTGGGGGAGA	176.3	1	455	265	259	54	74	190	218	265	140	318	225	284	67	251	10	455	337	267	88	88	113	219	75	124	122	207	1	276	1	211	93	229	130	62	15	199	216	146	166	400	192
KLK8	NM_144507.1	NM_144507.1:344	Endogenous	mRNA	Hs	CTATACCAACATCTGCCGCTACCTGGACTGGATCAAGAAGATCATAGGCAGCAAGGGCTGATTCTAGGATAAGCACTAGATCTCCCTTAATAAACTCACA	185.975	1	601	223	311	31	146	235	430	290	292	191	241	311	148	243	13	524	601	201	164	64	91	129	61	96	162	106	1	186	1	169	72	210	190	17	4	130	208	113	216	262	356
KRT6A	NM_005554.3	NM_005554.3:991	Endogenous	mRNA	Hs	AGCAGCAGAGAATGAATTTGTGACTCTGAAGAAGGATGTGGATGCTGCCTACATGAACAAGGTTGAACTGCAAGCCAAGGCAGACACTCTCACAGACGAG	9422.7	6	41207	18262	11963	3913	3430	14703	14737	18811	8975	20112	7791	20269	4477	17218	337	41207	18751	10625	2471	4218	2558	5949	2519	5777	6002	12888	12	15341	6	9682	1819	14633	2982	1039	181	7197	6736	6591	6689	17702	8335
KRT10	NM_000421.3	NM_000421.3:894	Endogenous	mRNA	Hs	AAATGAAAGACCTTCGAAATGTGTCCACTGGTGATGTGAATGTGGAAATGAATGCTGCCCCGGGTGTTGATCTGACTCAACTTCTGAATAACATGAGAAG	23130.3	70	84029	13647	45273	4476	31371	14961	65662	29859	47853	14694	45762	23608	23583	30406	5007	37147	84029	21182	29390	7740	21713	24571	15364	13800	37150	10555	87	16547	70	20420	20119	21362	32439	1405	694	11536	30234	5218	27478	5855	32944
LAMA3	NM_000227.3	NM_000227.3:4260	Endogenous	mRNA	Hs	CAGAGGACTGGTGTTTCACACGGGCACTAAGAACTCCTTTATGGCTCTTTATCTTTCAAAAGGACGTCTGGTCTTTGCACTGGGGACAGATGGGAAAAAA	34.8	3	131	31	36	22	27	51	47	34	35	56	35	52	23	44	3	131	77	40	30	10	19	40	14	23	25	47	3	34	4	52	21	59	31	5	3	39	36	20	25	82	26
MAPK1	NM_138957.2	NM_138957.2:430	Endogenous	mRNA	Hs	ACTGCCAGAGAACCCTGAGGGAGATAAAAATCTTACTGCGCTTCAGACATGAGAACATCATTGGAATCAATGACATTATTCGAGCACCAACCATCGAGCA	146.3	1	504	116	150	90	104	238	221	134	134	244	137	195	81	140	14	504	341	122	77	56	72	191	60	108	114	202	2	164	1	211	113	328	125	16	8	174	141	109	127	283	205
MAPK3	NM_001040056.1	NM_001040056.1:580	Endogenous	mRNA	Hs	AACGTGCTCCACCGAGATCTAAAGCCCTCCAACCTGCTCATCAACACCACCTGCGACCTTAAGATTTGTGATTTCGGCCTGGCCCGGATTGCCGATCCTG	318.25	1	757	245	272	253	238	465	424	251	276	522	291	401	194	298	40	757	598	397	256	181	215	578	134	290	270	349	5	311	1	451	268	665	328	33	9	399	374	286	322	654	429
MIF	NM_002415.1	NM_002415.1:319	Endogenous	mRNA	Hs	TCCTACAGCAAGCTGCTGTGCGGCCTGCTGGCCGAGCGCCTGCGCATCAGCCCGGACAGGGTCTACATCAACTATTACGACATGAACGCGGCCAATGTGG	1146.17	1	3324	1402	1323	725	857	1842	1713	1188	1048	1876	889	1855	789	1569	163	3324	2425	1361	701	594	777	1628	516	777	799	1466	3	1310	1	1416	477	2132	819	141	31	1019	1182	655	1012	2692	1350
MKI67	NM_002417.2	NM_002417.2:4020	Endogenous	mRNA	Hs	AGCAGATGTAGAGGGAGAACTCTTAGCGTGCAGGAATCTAATGCCATCAGCAGGCAAAGCCATGCACACGCCTAAACCATCAGTAGGTGAAGAGAAAGAC	128.975	1	519	135	147	47	90	218	231	212	176	200	105	275	101	212	16	519	268	128	64	78	68	123	63	74	88	164	1	149	1	150	60	203	63	17	5	98	81	77	63	247	142
MMP1	NM_002421.3	NM_002421.3:1117	Endogenous	mRNA	Hs	AAATGGGCTTGAAGCTGCTTACGAATTTGCCGACAGAGATGAAGTCCGGTTTTTCAAAGGGAATAAGTACTGGGCTGTTCAGGGACAGAATGTGCTACAC	1291.03	1	12347	811	52	328	91	2652	608	1076	191	5307	464	4906	113	2533	26	12347	1255	3080	17	203	51	884	50	1161	258	1676	1	1303	1	1433	139	4283	34	153	14	982	101	1336	145	1415	161
MMP2	NM_004530.2	NM_004530.2:2360	Endogenous	mRNA	Hs	CCCGGAGGGGCCTGGCAGCCGTGCCTTCAGCTCTACAGCTAATCAGCATTCTCACTCCTACCTGGTAATTTAAGATTCCAGAGAGTGGCTCCTCCCGGTG	1796.9	1	6795	1590	865	1563	747	3039	1155	1127	639	4599	996	2451	373	1684	169	6795	2331	2120	441	1125	689	3414	546	2617	1250	3662	5	1638	1	1661	517	5582	863	107	16	3542	1382	1606	1042	5882	2045
MMP3	NM_002422.3	NM_002422.3:25	Endogenous	mRNA	Hs	AGGCATAGAGACAACATAGAGCTAAGTAAAGCCAGTGGAAATGAAGAGTCTTCCAATCCTACTGTTGCTGTGCGTGGCAGTTTGCTCAGCCTATCCATTG	82.95	1	676	30	6	16	8	76	24	34	5	273	32	414	13	148	4	676	95	406	1	2	4	39	4	125	26	134	1	52	1	171	17	167	6	27	1	32	8	74	9	139	18
MMP7	NM_002423.3	NM_002423.3:311	Endogenous	mRNA	Hs	GTGCCAGATGTTGCAGAATACTCACTATTTCCAAATAGCCCAAAATGGACTTCCAAAGTGGTCACCTACAGGATCGTATCATATACTCGAGACTTACCGC	21.1	1	76	19	12	19	7	59	39	9	6	76	12	36	41	10	1	60	39	48	17	9	13	21	8	5	5	4	1	11	1	62	2	54	15	2	1	22	53	8	8	15	14
MMP8	NM_002424.2	NM_002424.2:2590	Endogenous	mRNA	Hs	CTCTCTCCTAGAGTCCAAACCCAAATGGGCCAGTTGGATCTGATGTTCGTCAGTTCTTTACTTCTATTTCCTGGGGTACTCAGGAGGGCACACACTATAG	2.9	1	16	5	3	1	1	1	5	4	1	3	1	1	1	2	1	16	6	6	2	1	2	2	1	3	1	2	1	5	1	4	6	6	1	1	1	2	2	1	3	5	5
MMP9	NM_004994.2	NM_004994.2:1530	Endogenous	mRNA	Hs	CACTACTGTGCCTTTGAGTCCGGTGGACGATGCCTGCAACGTGAACATCTTCGACGCCATCGCGGAGATTGGGAACCAGCTGTATTTGTTCAAGGATGGG	69.4	1	491	14	17	51	30	121	74	44	26	163	34	127	34	52	2	491	195	200	17	27	8	103	12	75	28	107	1	53	1	165	26	105	26	14	4	48	21	75	72	87	26
MMP10	NM_002425.1	NM_002425.1:88	Endogenous	mRNA	Hs	GCAGCAAAAGAGGAGGACTCCAACAAGGATCTTGCCCAGCAATACCTAGAAAAGTACTACAACCTCGAAAAGGATGTGAAACAGTTTAGAAGAAAGGACA	3.85	1	24	3	5	3	1	6	5	5	1	3	3	6	2	2	1	24	8	6	2	1	1	7	2	4	1	4	2	2	1	3	2	9	3	1	1	9	1	2	1	7	4
MMP12	NM_002426.3	NM_002426.3:769	Endogenous	mRNA	Hs	ATGTTGACATCAACACATTTCGCCTCTCTGCTGATGACATACGTGGCATTCAGTCCCTGTATGGAGACCCAAAAGAGAACCAACGCTTGCCAAATCCTGA	12.575	1	144	6	3	2	7	15	15	9	3	35	3	32	8	18	1	144	41	6	2	5	1	15	1	3	2	10	1	4	1	15	1	11	5	3	1	8	1	15	9	33	8
MMP13	NM_002427.2	NM_002427.2:951	Endogenous	mRNA	Hs	CTGGCGCCTGCATCCTCAGCAGGTTGATGCGGAGCTGTTTTTAACGAAATCATTTTGGCCAGAACTTCCCAACCGTATTGATGCTGCATATGAGCACCCT	2.05	1	10	1	2	1	1	4	3	3	1	2	1	4	1	3	1	10	2	3	2	2	1	1	1	1	4	2	1	2	1	1	1	4	2	1	1	1	1	4	2	1	2
MMP14	NM_004995.2	NM_004995.2:1470	Endogenous	mRNA	Hs	GACAAGATTGATGCTGCTCTCTTCTGGATGCCCAATGGAAAGACCTACTTCTTCCGTGGAAACAAGTACTACCGTTTCAACGAAGAGCTCAGGGCAGTGG	344.9	1	1821	241	162	221	108	686	339	284	219	1175	240	723	116	412	14	1821	702	333	86	107	91	623	91	225	164	607	1	344	1	380	87	1077	143	16	2	478	206	199	127	664	281
MMP28	NM_001032278.1	NM_001032278.1:412	Endogenous	mRNA	Hs	AAAGCTCCCACCTCCACTCGATTCAGCGATGCCATCAGAGCGTTTCAGTGGGTGTCCCAGCTACCTGTCAGCGGCGTGTTGGACCGCGCCACCCTGCGCC	75.45	1	212	46	97	42	106	64	186	122	161	71	134	71	63	77	29	131	212	59	86	23	72	90	57	43	73	58	2	52	1	53	57	88	118	7	4	65	111	26	79	73	109
MT1A	NM_005946.2	NM_005946.2:0	Endogenous	mRNA	Hs	ACCAAGCCTTCCACGTGCGCCTTATAGCCTCTCAACTTCTTGCTTGGGATCTCCAACCTCACCGCGGCTCGAAATGGACCCCAACTGCTCCTGCGCCACT	59.95	1	395	43	32	96	20	74	30	17	18	176	51	36	16	34	7	90	95	56	31	12	6	47	4	17	13	395	2	43	1	241	50	187	47	4	6	71	33	49	38	138	72
MT2A	NM_005953.3	NM_005953.3:225	Endogenous	mRNA	Hs	CAGGGCTGCATCTGCAAAGGGGCGTCGGACAAGTGCAGCTGCTGCGCCTGATGCTGGGACAGCCCCGCTCCCAGATGTAAAGAACGCGACTTCCACAAAC	1471.83	1	6613	1809	900	2122	591	1752	783	943	445	4012	1085	2020	304	1436	146	6613	2574	2653	462	628	258	1705	267	1303	456	5576	2	1372	1	3547	595	2778	399	184	32	1613	710	1592	911	3082	1212
MYC	NM_002467.3	NM_002467.3:1610	Endogenous	mRNA	Hs	TCGGACACCGAGGAGAATGTCAAGAGGCGAACACACAACGTCTTGGAGCGCCAGAGGAGGAACGAGCTAAAACGGAGCTTTTTTGCCCTGCGTGACCAGA	371.275	2	1441	390	441	189	200	540	489	389	367	643	391	599	294	470	63	1441	886	548	275	178	189	372	84	259	198	447	2	408	2	438	199	704	322	63	16	270	284	229	281	872	419
NF1	NM_000267.2	NM_000267.2:1035	Endogenous	mRNA	Hs	TACCAGATCCCACAGACTGATATGGCTGAATGTGCAGAAAAGCTATTTGACTTGGTGGATGGTTTTGCTGAAAGCACCAAACGTAAAGCAGCAGTTTGGC	78.375	1	296	79	85	92	60	163	130	75	82	152	81	116	54	75	4	296	184	57	42	26	29	85	24	34	48	137	1	76	2	120	41	198	64	7	3	72	60	36	45	101	99
NGF	NM_002506.2	NM_002506.2:634	Endogenous	mRNA	Hs	GAGGTGATGGTGTTGGGAGAGGTGAACATTAACAACAGTGTATTCAAACAGTACTTTTTTGAGACCAAGTGCCGGGACCCAAATCCCGTTGACAGCGGGT	6.325	1	19	2	6	3	9	4	8	8	4	13	11	7	4	11	5	19	13	7	8	3	3	9	1	3	4	12	2	5	1	8	6	6	3	1	1	8	6	2	7	10	10
PDGFA	NM_002607.5	NM_002607.5:2460	Endogenous	mRNA	Hs	CGTTTGTGGCTGAGTGACAACTTGTTCCCCGCAGTGCACACCTAGAATGCTGTGTTCCCACGCGGCACGTGAGATGCATTGCCGCTTCTGTCTGTGTTGT	28.65	1	95	18	29	26	18	66	46	20	25	89	43	61	15	30	3	95	43	30	18	6	17	40	12	8	8	30	1	51	1	43	9	89	16	1	1	22	17	13	10	59	17
PF4	NM_002619.2	NM_002619.2:0	Endogenous	mRNA	Hs	CCATCGCACTGAGCACTGAGATCCTGCTGGAAGCTCTGCCGCAGCATGAGCTCCGCAGCCGGGTTCTGCGCCTCACGCCCCGGGCTGCTGTTCCTGGGGT	5.775	1	31	4	2	4	2	13	8	10	3	17	6	3	1	5	2	12	11	6	2	1	3	7	1	3	5	7	3	31	1	21	6	9	2	1	1	1	1	5	6	3	2
PI3	NM_002638.3	NM_002638.3:274	Endogenous	mRNA	Hs	CCATGTTGAATCCCCCTAACCGCTGCTTGAAAGATACTGACTGCCCAGGAATCAAGAAGTGCTGTGAAGGCTCTTGCGGGATGGCCTGTTTCGTTCCCCA	2621.93	2	10908	5328	2620	667	694	3678	3518	5073	2451	3063	1146	7790	1347	3540	165	10908	6812	3907	604	628	398	991	312	1461	1240	1539	4	4029	2	3830	1091	2610	868	771	165	1588	1279	3413	2222	7716	5409
PI3K	NM_006218.2	NM_006218.2:2445	Endogenous	mRNA	Hs	CCTCAGGCTTGAAGAGTGTCGAATTATGTCCTCTGCAAAAAGGCCACTGTGGTTGAATTGGGAGAACCCAGACATCATGTCAGAGTTACTGTTTCAGAAC	40.125	1	137	37	37	34	34	65	93	46	51	101	46	57	32	48	3	137	106	20	17	14	11	35	14	19	19	86	1	51	1	78	18	97	17	1	3	43	22	16	19	39	37
PLAT	NM_000931.2	NM_000931.2:1334	Endogenous	mRNA	Hs	CAAGGTTACCAACTACCTAGACTGGATTCGTGACAACATGCGACCGTGACCAGGAACACCCGACTCCTCAAAAGCAAATGAGATCCCGCCTCTTCTTCTT	132.8	1	516	137	147	101	54	223	131	89	53	365	57	141	52	71	10	516	186	168	42	117	75	253	22	160	74	395	1	113	2	156	55	312	63	5	2	214	104	88	57	339	162
PLAU	NM_002658.2	NM_002658.2:793	Endogenous	mRNA	Hs	TTCATTGATTACCCAAAGAAGGAGGACTACATCGTCTACCTGGGTCGCTCAAGGCTTAACTCCAACACGCAAGGGGAGATGAAGTTTGAGGTGGAAAACC	181.725	1	890	139	118	122	75	347	212	190	119	440	148	292	82	196	20	890	433	214	68	79	57	200	38	98	52	301	2	152	1	349	83	614	97	14	3	167	105	119	91	364	178
PLAUR	NM_001005376.2	NM_001005376.2:538	Endogenous	mRNA	Hs	CGGGCTGTCACCTATTCCCGAAGCCGTTACCTCGAATGCATTTCCTGTGGCTCATCAGACATGAGCTGTGAGAGGGGCCGGCACCAGAGCCTGCAGTGCC	69.2	1	489	51	27	50	26	124	49	34	30	162	28	120	30	67	9	489	149	91	23	28	17	105	15	65	25	124	2	43	1	119	28	150	26	7	2	104	43	51	20	178	56
POLR1B	NM_019014.3	NM_019014.3:3320	Endogenous	mRNA	Hs	GGAGAACTCGGCCTTAGAATACTTTGGTGAGATGTTAAAGGCTGCTGGCTACAATTTCTATGGCACCGAGAGGTTATATAGTGGCATCAGTGGGCTAGAA	39.8	1	156	39	48	34	25	54	51	65	49	86	58	60	26	51	7	156	109	47	39	10	15	24	12	20	22	54	3	24	1	51	21	78	24	6	3	27	33	22	26	59	53
PTGS2	NM_000963.1	NM_000963.1:495	Endogenous	mRNA	Hs	GCTACAAAAGCTGGGAAGCCTTCTCTAACCTCTCCTATTATACTAGAGCCCTTCCTCCTGTGCCTGATGATTGCCCGACTCCCTTGGGTGTCAAAGGTAA	68.475	1	633	50	23	36	9	88	52	41	24	196	44	77	19	54	1	633	103	130	14	25	21	112	6	48	12	52	1	46	1	116	24	132	22	23	1	117	25	87	23	213	38
RAC1	NM_006908.4	NM_006908.4:500	Endogenous	mRNA	Hs	CTGCATCATTTGAAAATGTCCGTGCAAAGTGGTATCCTGAGGTGCGGCACCACTGTCCCAACACTCCCATCATCCTAGTGGGAACTAAACTTGATCTTAG	1152.7	2	4373	1138	1129	900	862	2037	1943	1330	1142	2071	1089	1805	719	1272	191	4373	2971	1055	604	452	484	1256	405	654	702	2160	4	1364	2	1673	528	2553	795	124	27	1032	919	693	859	1674	1117
RHOA	NM_001664.2	NM_001664.2:1230	Endogenous	mRNA	Hs	GGTACTCTGGTGAGTCACCACTTCAGGGCTTTACTCCGTAACAGATTTTGTTGGCATAGCTCTGGGGTGGGCAGTTTTTTGAAAATGGGCTCAACCAGAA	233.7	1	1146	238	270	187	179	369	423	235	235	613	268	421	116	300	24	1146	732	148	79	53	55	207	72	103	115	454	1	266	1	349	65	558	89	15	4	187	117	63	114	272	205
S100A7	NM_002963.3	NM_002963.3:22	Endogenous	mRNA	Hs	CATCCTTCTACTCGTGACGCTTCCCAGCTCTGGCTTTTTGAAAGCAAAGATGAGCAACACTCAAGCTGAGAGGTCCATAATAGGCATGATCGACATGTTT	3908.43	1	16952	11425	6750	1841	1798	5711	5378	6477	4263	4404	2338	9371	2754	6104	109	12776	16952	3439	1137	948	585	1849	1095	1539	1692	2837	1	5598	2	7668	1625	5325	1873	731	188	1232	1775	2165	2789	5589	6204
S100A8	NM_002964.3	NM_002964.3:115	Endogenous	mRNA	Hs	CTGATAAAGGGGAATTTCCATGCCGTCTACAGGGATGACCTGAAGAAATTGCTAGAGACCGAGTGTCCTCAGTATATCAGGAAAAAGGGTGCAGACGTCT	4276.52	1	21490	8474	5205	1376	1315	5337	5771	6512	4333	6262	3011	12044	3511	6682	129	18469	21490	4833	1498	1388	779	1921	774	2008	1900	3124	2	5022	1	6089	1536	5135	1544	731	165	1679	2051	2960	3642	6118	6240
S100A9	NM_002965.2	NM_002965.2:75	Endogenous	mRNA	Hs	AACATAGAGACCATCATCAACACCTTCCACCAATACTCTGTGAAGCTGGGGCACCCAGACACCCTGAACCAGGGGGAATTCAAAGAGCTGGTGCGAAAAG	11105.8	5	41354	23667	13691	4184	4293	15312	14275	16767	10307	13685	6351	26511	7517	16588	740	39975	41354	14596	3960	4684	2665	6551	2355	6426	5421	9082	8	13304	5	15585	4836	14353	5154	2818	595	6550	6939	10456	12188	21532	18951
SERPINB3	NM_006919.2	NM_006919.2:0	Endogenous	mRNA	Hs	AAATACTAACCACAGAGGGAGAGGCAGCAAGAGGAGAGGCATAAATTCAGGATCTCACCCTTCATTCCACAGACACACATAGCCTCTCTGCCCACCTCTG	13.65	1	52	20	21	7	11	22	25	25	21	17	7	24	8	15	1	52	44	18	9	5	2	5	5	5	5	10	2	16	1	15	4	20	8	4	1	10	7	11	9	27	27
SERPINE1	NM_000602.2	NM_000602.2:2470	Endogenous	mRNA	Hs	TGTGTTCAATAGATTTAGGAGCAGAAATGCAAGGGGCTGCATGACCTACCAGGACAGAACTTTCCCCAATTACAGGGTGACTCACAGCCGCATTGGTGAC	214.325	1	1213	141	65	99	43	656	180	153	71	268	39	443	41	204	14	1213	238	681	30	60	11	425	30	204	47	343	1	483	1	280	48	563	24	16	1	238	61	283	82	679	114
SLC30A1	NM_021194.2	NM_021194.2:1375	Endogenous	mRNA	Hs	GGAATTCACGCTACTACCATTCAGCCTGAATTTGCTAGTGTAGGCTCTAAATCAAGTGTAGTTCCGTGTGAACTTGCCTGCAGAACCCAGTGTGCTTTGA	57.375	2	247	49	88	63	45	83	92	25	47	141	70	99	35	58	10	247	175	32	16	13	20	55	13	28	21	140	2	80	3	94	19	123	26	5	2	45	30	46	31	67	57
SLC39A2	NM_014579.1	NM_014579.1:1010	Endogenous	mRNA	Hs	GGAGCTGTGTAGCCGCTGGTTTTGCCTTCATGGCCTTTATTGCCTTGTGGGCCTGAGAGATTCCTGGCTTTTCTGATGGACCTATTTAGGACAACCTCTC	23.7	1	68	29	35	5	31	13	56	32	40	28	42	50	27	26	1	38	68	29	26	14	17	15	12	9	34	17	1	29	1	21	14	27	31	2	1	6	31	9	26	15	40
SLC39A4	NM_017767.2	NM_017767.2:1831	Endogenous	mRNA	Hs	GCCACCTCGCTGGCCGTGTTCTGCCACGAGTTGCCACACGAGCTGGGGGACTTCGCCGCCTTGCTGCACGCGGGGCTGTCCGTGCGCCAAGCACTGCTGC	74.375	1	255	89	112	35	36	99	88	51	38	130	71	116	41	107	24	255	179	96	57	46	49	103	39	46	64	94	1	65	1	80	47	97	42	15	3	97	92	44	74	163	89
SOD1	NM_000454.4	NM_000454.4:35	Endogenous	mRNA	Hs	GCCTATAAAGTAGTCGCGGAGACGGGGTGCTGGTTTGCGTCGTAGTCTCCTGCAGCGTCTGGGGTTTCCGTTGCAGTCCTCGGAACCAGGACCTCGGCGT	78.35	1	225	75	99	87	63	108	100	77	66	174	65	108	46	82	16	225	174	62	44	49	58	131	24	56	76	129	2	91	1	106	37	166	65	8	4	78	73	40	44	141	84
STAT3	NM_003150.3	NM_003150.3	Endogenous	mRNA	Hs	AAAGAAGGAGGCGTCACTTTCACTTGGGTGGAGAAGGACATCAGCGGTAAGACCCAGATCCAGTCCGTGGAACCATACACAAAGCAGCAGCTGAACAACA	943.975	1	3428	1160	918	919	545	1613	1152	859	772	1857	749	1205	636	964	154	3428	2496	868	435	420	371	971	202	569	420	1967	2	920	1	1506	489	2427	671	115	45	1043	869	730	749	1542	1000
TFPI	NM_001032281.2	NM_001032281.2	Endogenous	mRNA	Hs	ACAGTGTGAACGTTTCAAGTATGGTGGATGCCTGGGCAATATGAACAATTTTGAGACACTGGAAGAATGCAAGAACATTTGTGAAGATGGTCCGAATGGT	53.825	1	182	51	32	53	32	96	62	34	31	171	43	57	29	46	2	182	116	55	16	25	18	59	13	30	34	121	1	89	1	89	31	157	31	1	1	81	46	37	46	90	44
TGFA	NM_003236.2	NM_003236.2	Endogenous	mRNA	Hs	TGCCACAGACCTTCCTACTTGGCCTGTAATCACCTGTGCAGCCTTTTGTGGGCCTTCAAAACTCTGTCAAGAACTCCGTCTGCTTGGGGTTATTCAGTGT	27.4	1	104	38	45	16	14	39	59	33	33	56	20	38	20	33	2	104	54	34	16	11	9	30	4	18	9	41	1	21	1	32	22	39	22	6	1	29	29	17	20	43	37
TGFB1	NM_000660.3	NM_000660.3	Endogenous	mRNA	Hs	TATATGTTCTTCAACACATCAGAGCTCCGAGAAGCGGTACCTGAACCCGTGTTGCTCTCCCGGGCAGAGCTGCGTCTGCTGAGGCTCAAGTTAAAAGTGG	397.375	1	1756	297	287	320	215	679	531	396	280	782	282	594	188	433	80	1756	868	519	213	145	156	605	118	267	207	717	5	527	1	684	195	988	207	39	12	385	290	278	254	729	366
TGFB2	NM_003238.2	NM_003238.2	Endogenous	mRNA	Hs	AAGCCAGAGTGCCTGAACAACGGATTGAGCTATATCAGATTCTCAAGTCCAAAGATTTAACATCTCCAACCCAGCGCTACATCGACAGCAAAGTTGTGAA	10.475	1	38	7	9	5	12	16	23	7	7	12	16	18	9	9	1	38	21	7	8	1	3	11	2	12	6	33	1	9	1	14	5	31	12	1	1	6	9	4	6	23	3
TGFBR3	NM_003243.3	NM_003243.3	Endogenous	mRNA	Hs	CTTTGTTTTGGAGTCTCCTCTGAATGGCTGCGGTACTCGGCCCCGGTGGTCAGCCCTTGATGGTGTGGTCTACTATAACTCCATTGTGATACAGGTTCCA	183.025	1	506	139	124	287	189	272	238	103	105	314	135	149	119	102	27	458	317	128	97	84	97	402	60	165	146	506	3	182	1	250	90	412	162	5	2	287	229	151	186	384	214
THBD	NM_000361.2	NM_000361.2	Endogenous	mRNA	Hs	GTGGAGCCCGTGGACCCGTGCTTCAGAGCCAACTGCGAGTACCAGTGCCAGCCCCTGAACCAAACTAGCTACCTCTGCGTCTGCGCCGAGGGCTTCGCGC	362.75	1	1563	307	375	193	165	581	512	329	328	669	312	413	158	333	50	1563	755	521	245	188	206	496	103	278	235	513	5	317	1	420	179	691	322	62	12	464	286	332	326	819	446
TIMP1	NM_003254.2	NM_003254.2	Endogenous	mRNA	Hs	CGTGGGGACACCAGAAGTCAACCAGACCACCTTATACCAGCGTTATGAGATCAAGATGACCAAGATGTATAAAGGGTTCCAAGCCTTAGGGGATGCCGCT	1273.15	1	6684	776	443	1152	379	2468	733	586	341	2880	551	2113	331	871	44	6684	1947	2996	319	574	266	3749	255	975	398	3025	8	1289	1	2297	489	3095	388	72	12	1777	639	1845	600	2715	843
TIMP2	NM_003255.4	NM_003255.4	Endogenous	mRNA	Hs	GAAGGAGCCCCATCAATCCTATTAATCCTCAGAATTCCAGTGGGAGCCTCCCTCTGAGCCTTGTAGAAATGGGAGCGAGAAACCCCAGCTGAGCTGCGTT	1352.53	3	4403	999	896	1358	866	2640	1558	959	803	2962	973	1456	461	954	194	4214	1950	1334	567	743	673	2317	523	1425	959	2949	11	1326	3	1543	615	4403	1040	43	14	2171	1202	838	926	3555	1678
TIMP3	NM_000362.4	NM_000362.4	Endogenous	mRNA	Hs	ACCTGCCTTGCTTTGTGACTTCCAAGAACGAGTGTCTCTGGACCGACATGCTCTCCAATTTCGGTTACCCTGGCTACCAGTCCAAACACTACGCCTGCAT	286.6	1	987	206	322	377	288	497	452	126	178	690	219	361	246	120	34	537	364	190	138	94	150	478	75	185	199	609	5	297	4	485	244	987	377	7	1	367	340	159	264	446	346
TLR4	NM_138554.2	NM_138554.2	Endogenous	mRNA	Hs	ACTCAGAAAAGCCCTGCTGGATGGTAAATCATGGAATCCAGAAGGAACAGTGGGTACAGGATGCAATTGGCAGGAAGCAACATCTATCTGAAGAGGAAAA	71.875	1	327	61	38	83	36	121	54	38	32	149	41	79	23	45	9	327	172	73	31	15	13	106	17	48	32	171	1	86	1	121	20	258	41	7	2	107	70	49	36	180	82
TMPRSS6	NM_153609.2	NM_153609.2	Endogenous	mRNA	Hs	AGCCTTGCCTCCAGAGAGCAGATTCCAGCTTCGGAAGCCCCTGGTCTAACTTGGGATCTGGGAATGGAAGGTGCTCCCATCGGAGGGGACCCTCAGAGCC	4.45	1	17	6	6	4	4	5	9	7	6	3	3	4	3	4	1	17	13	3	2	2	1	4	1	8	3	2	2	3	1	7	2	5	1	2	1	3	8	3	9	7	3
TNF	NM_000594.2	NM_000594.2	Endogenous	mRNA	Hs	AGCAACAAGACCACCACTTCGAAACCTGGGATTCAGGAATGTGTGGCCTGCACAGTGAAGTGCTGGCAACCACTAAGAATTCAAACTGGGGCCTCCAGAA	23.725	1	136	18	23	16	14	45	39	24	18	30	22	27	28	11	5	136	97	28	14	9	7	25	8	11	10	19	1	14	1	42	7	60	12	2	1	18	13	15	14	33	32
VEGFA	NM_001025366.1	NM_001025366.1	Endogenous	mRNA	Hs	GAGTCCAACATCACCATGCAGATTATGCGGATCAAACCTCACCAAGGCCAGCACATAGGAGAGATGAGCTTCCTACAGCACAACAAATGTGAATGCAGAC	135.975	1	546	150	130	117	84	205	239	107	116	266	146	137	104	108	19	546	295	153	77	52	56	156	44	85	78	210	1	171	4	200	76	324	114	25	8	132	113	88	128	233	142
VTN	NM_000638.3	NM_000638.3	Endogenous	mRNA	Hs	ACGTGGCTGTCCTTGTTCTCCAGTGAGGAGAGCAACTTGGGAGCCAACAACTATGATGACTACAGGATGGACTGGCTTGTGCCTGCCACCTGTGAACCCA	3.675	1	12	3	3	1	3	5	6	5	2	7	2	2	2	4	1	12	7	4	1	2	3	2	1	5	3	3	2	6	1	4	6	6	3	1	1	1	4	3	3	11	6
VWF	NM_000552.3	NM_000552.3	Endogenous	mRNA	Hs	CACCTGCAACCCCTGCCCCCTGGGTTACAAGGAAGAAAATAACACAGGTGAATGTTGTGGGAGATGTTTGCCTACGGCTTGCACCATTCAGCTAAGAGGA	225.3	1	850	116	67	181	85	480	253	115	122	611	193	399	123	125	19	834	343	238	85	95	70	396	55	190	81	398	1	380	1	309	168	850	144	6	1	283	150	112	88	582	263
WAS	NM_000377.2	NM_000377.2	Endogenous	mRNA	Hs	GGCCGAGGAGCACCAGCGGTTCAGCAGAACATACCCTCCACCCTCCTCCAGGACCACGAGAACCAGCGACTCTTTGAGATGCTTGGACGAAAATGCTTGA	124.3	1	555	78	58	114	59	172	107	93	81	198	69	135	42	104	9	555	261	183	64	46	35	235	32	106	71	229	1	171	1	232	77	339	69	11	2	153	79	150	83	341	127
WISP1	NM_080838.1	NM_080838.1	Endogenous	mRNA	Hs	TGTAGGAATCCCAATGACATCTTTGCTGACTTGGAATCCTACCCTGACTTCTCAGAAATTGCCAACTAGGCAGGCACAAATCTTGGGTCTTGGGGACTAA	9.7	1	98	8	5	12	6	12	9	6	3	23	2	6	2	10	1	98	21	8	3	1	1	10	5	2	2	38	1	7	1	8	2	22	2	1	2	19	5	4	2	11	7
WNT5A	NM_003392.3	NM_003392.3	Endogenous	mRNA	Hs	ACCCTGTTCAGATGTCAGAAGTATATATTATAGGAGCACAGCCTCTCTGCAGCCAACTGGCAGGACTTTCTCAAGGACAGAAGAAACTGTGCCACTTGTA	19.2	1	70	24	35	6	7	27	24	37	15	59	16	29	17	16	4	70	32	22	18	6	9	22	5	12	22	16	1	27	2	15	12	35	16	2	1	6	17	9	27	24	24
ABCF1	NM_001090.2	NM_001090.2:850	Housekeeping	mRNA	Hs	GATGTCCTCCCGCCAAGCCATGTTAGAAAATGCATCTGACATCAAGCTGGAGAAGTTCAGCATCTCCGCTCATGGCAAGGAGCTGTTCGTCAATGCAGAC	75.575	1	316	74	74	57	44	112	131	70	65	171	78	123	54	81	10	316	219	65	41	27	30	86	24	53	43	117	1	69	1	84	36	137	60	11	1	70	79	43	62	114	90
GUSB	NM_000181.3	NM_000181.3:1899	Housekeeping	mRNA	Hs	CCGATTTCATGACTGAACAGTCACCGACGAGAGTGCTGGGGAATAAAAAGGGGATCTTCACTCGGCAGAGACAACCAAAAAGTGCAGCGTTCCTTTTGCG	145.425	1	496	144	152	138	112	268	232	121	106	302	128	167	78	135	29	496	275	133	75	51	68	205	64	100	70	284	2	166	1	196	98	397	120	10	1	147	131	101	93	281	140
HPRT1	NM_000194.1	NM_000194.1:240	Housekeeping	mRNA	Hs	TGTGATGAAGGAGATGGGAGGCCATCACATTGTAGCCCTCTGTGTGCTCAAGGGGGGCTATAAATTCTTTGCTGACCTGCTGGATTACATCAAAGCACTG	81.775	1	311	102	95	83	69	154	119	87	75	187	113	148	57	114	8	311	230	77	27	30	28	76	21	29	45	144	1	90	1	115	27	174	44	8	1	62	63	32	52	103	69
LDHA	NM_001165414.1	NM_001165414.1:1690	Housekeeping	mRNA	Hs	AACTTCCTGGCTCCTTCACTGAACATGCCTAGTCCAACATTTTTTCCCAGTGAGTCACATCCTGGGATCCAGTGTATAAATCCAATATCATGTCTTGTGC	604.575	1	2469	711	719	540	425	1121	1162	669	632	1306	661	947	372	730	24	2469	1662	402	204	168	178	479	161	214	260	1452	1	914	2	1077	226	1544	263	26	13	364	303	283	338	667	494
PTEN	NM_000314.3	NM_000314.3:1675	Housekeeping	mRNA	Hs	TGTGGTCTGCCAGCTAAAGGTGAAGATATATTCCTCCAATTCAGGACCCACACGACGGGAAGACAAGTTCATGTACTTTGAGTTCCCTCAGCCGTTACCT	310.35	1	1221	294	405	265	214	466	514	313	342	713	362	460	223	349	35	1221	842	250	196	102	109	309	103	156	154	601	1	357	1	464	139	775	186	22	5	258	220	133	184	401	270
RPLP0	NM_001002.3	NM_001002.3:250	Housekeeping	mRNA	Hs	CGAAATGTTTCATTGTGGGAGCAGACAATGTGGGCTCCAAGCAGATGCAGCAGATCCGCATGTCCCTTCGCGGGAAGGCTGTGGTGCTGATGGGCAAGAA	7261.48	4	20672	7273	8451	5222	6614	10489	12398	7758	7762	12263	7115	9270	4856	8130	1608	20672	18267	6596	5175	3497	4629	9632	3395	4452	4931	10778	16	6738	4	9189	3982	14548	6623	694	146	6476	7664	3634	6330	13286	9896
NEG_A	ERCC_00096.1	ERCC_00096.1:230	Negative	System	CUS	AACCGCCGCATACGGCCGATTGTCGCAGCCCGGGTCGATTATAACAACGGTGCAATCTCAGCTAAACCGACGCAGTTTTGCTCCTTGGATTCTGAGCCCG	5.1	2	11	3	10	2	11	7	9	4	11	7	4	2	7	8	3	4	10	3	2	2	2	9	4	3	6	5	2	5	3	4	8	2	6	7	4	4	3	3	5	4	6
NEG_B	ERCC_00041.1	ERCC_00041.1:440	Negative	System	CUS	GCACTGGCATTGGTCGTTTCAGGAGGCCATACAGAACTGGTTTATATGAAGGAACATGGATCATTTGAAGTCATTGGGGAAACCCTTGATGATGCGGCAG	3.15	1	9	3	4	2	4	1	3	4	3	5	1	2	2	6	5	5	2	1	2	2	1	1	1	4	1	6	2	3	1	3	5	3	1	8	2	3	4	5	2	4	9
NEG_C	ERCC_00019.1	ERCC_00019.1:140	Negative	System	CUS	GTACAGGCTGCTGGCTCATGTTTCCTTCTACGCTGCACTTGCGGGCATAGAGGTCGGTTGCGATCTATATTCGGAGATAACTATTCACCCAGCGCCACTC	5.25	1	14	9	4	2	5	4	10	7	6	6	9	9	3	6	1	13	14	6	2	6	5	5	4	1	4	3	3	5	1	5	4	8	5	1	1	6	7	4	2	8	6
NEG_D	ERCC_00076.1	ERCC_00076.1:355	Negative	System	CUS	AGAGATCACGTGGACCAAAGCTGATTGATTACGGGACTGGCCGTAAGTGCTGCCCGCGAGTAGATCGTCTAGATCCGGCTAAAATTCCCTGCGGTGCCTT	3.05	1	9	1	2	3	1	4	3	5	2	6	1	4	3	9	4	9	3	3	1	1	2	3	1	1	1	5	2	3	3	7	1	8	2	1	1	3	3	2	2	4	2
NEG_E	ERCC_00098.1	ERCC_00098.1:785	Negative	System	CUS	CCCAGATGACCTTCTCCCTCATAATCACTTAATCTGAGCGCAGGAGGCAGGCTGTATTAATTCCGGCCTCCAACCGGACCGTGGAACGACGCGACCAAGT	7.525	1	16	7	6	4	11	3	11	9	10	8	5	9	10	5	7	9	16	5	5	4	8	14	3	8	5	11	12	12	3	6	4	5	8	5	6	1	9	6	11	10	10
NEG_F	ERCC_00126.1	ERCC_00126.1:220	Negative	System	CUS	GGGTCCTTACCGGCTGTAAGCTCACTACAATCCAGGTACAGAGTGCGTTAACCGGCCATTAGAGGGCCGCTACACCCGTCAGAATTTAAACGTATGGGCG	4.6	1	9	3	4	9	5	5	6	1	2	4	3	7	3	6	6	2	9	5	2	2	4	3	4	3	7	5	8	6	6	5	4	2	1	4	6	4	3	7	4	7	7
NEG_G	ERCC_00144.1	ERCC_00144.1:15	Negative	System	CUS	ACCCGTATGAACTGTTGCCGGCTCGGAAATGTTAAGGCTCTGCGCACGCACTTTATCATTCGCAGCCTGTTCTGTCAGCGGGTCAGCCTAGGTTACGGTG	1.35	1	3	1	1	1	1	2	1	1	2	1	1	3	1	1	2	1	3	1	1	1	1	1	2	1	1	1	1	2	1	1	1	1	2	2	1	1	1	2	2	1	2
NEG_H	ERCC_00154.1	ERCC_00154.1:115	Negative	System	CUS	TTGGTCCGAGGAGGCATATAGGAAACGATGGGCACGCGCTATTCAGACGTTATTTGGTATGGAGTAAGAGGCCGGAAACTGGGCTCGATTGATGGATACT	1.875	1	5	1	1	1	2	2	1	2	1	4	1	3	1	2	1	5	2	2	1	1	2	5	2	2	3	1	1	1	1	3	1	1	2	1	2	3	1	2	2	3	2
POS_A	ERCC_00117.1	ERCC_00117.1:385	Positive	System	CUS	TCAGGCCTTGCCCTTACTAATGGCGCGTTGTAACGGGCCTTGAGGGAATGTCACTATTGAGGCACCCGTTCGACCCTCAGAGATATACCATTCCGCCTAT	33607.7	25647	45725	32750	30950	35552	33956	32634	37442	26090	35374	31432	28605	28503	26526	39666	40879	30453	33677	30549	26029	25647	35083	37112	28905	36866	33992	41175	41918	37524	29962	41857	36375	33147	32645	30022	28046	31145	35921	37334	31534	31306	45725
POS_B	ERCC_00112.1	ERCC_00112.1:695	Positive	System	CUS	ATGAAAGCGCTGCTACTATGATAAGAGTACACGTACAGGTCTCGCCCGATTGGATTATGGCGAGCTGCCGCATTGACGGACATACCTTTGAACGTAATCG	6604.88	4902	8949	6462	6049	6993	6774	6491	7619	5216	6802	6049	5539	5637	5470	7630	7967	6114	6767	5674	4902	4909	6726	7100	5528	7258	6792	8338	8296	7383	5746	8429	7254	6447	6404	5835	5594	6239	6984	7365	6211	6253	8949
POS_C	ERCC_00002.1	ERCC_00002.1:850	Positive	System	CUS	GCCGCTTTCGCTCGGGTCTGCGGGTTATAGCTTTTCAGTCTCGACGGGCTAGCACACATCTGGTTGACTAGGCGCATAGTCGCCATTCACAGATTTGCTC	1791.4	1340	2428	1759	1612	1964	1888	1678	1936	1414	1844	1535	1545	1525	1418	2051	2094	1684	1857	1569	1340	1380	1861	1942	1495	1922	1786	2176	2296	2092	1638	2294	1973	1785	1745	1663	1427	1636	1989	1978	1722	1715	2428
POS_D	ERCC_00092.1	ERCC_00092.1:540	Positive	System	CUS	TACCTGGCATTTGGGCACTTCTTGCGTTTAAGCGGGAAAGATCGCGAGGGCCCGCTATTTGCGATACTTCCCATGTCGGTGCCGTCGCCTCTATGTACTC	535.325	369	780	533	513	576	536	527	579	434	535	530	484	457	405	646	662	463	544	481	369	404	576	551	440	594	516	696	648	597	449	657	565	531	495	453	451	482	581	613	531	529	780
POS_E	ERCC_00035.1	ERCC_00035.1:485	Positive	System	CUS	GGTTGAATTTGAGCGGATGGGCTCAACTGCGTCGTAACCGGTAGATACAGGGCATACGAGCCTCCCTATTTAACGGCATCATCCCGCGTAGTGCTGGTCA	103.925	67	136	98	109	112	110	93	120	78	103	83	104	82	83	124	129	107	126	82	72	67	118	118	76	116	91	127	132	130	84	129	119	100	86	88	92	79	112	106	117	119	136
POS_F	ERCC_00034.1	ERCC_00034.1:195	Positive	System	CUS	ACGAAGCTGTTCGGCCGCACGCAAGTACCTCCCACTTAGAAAGCGAATAACCCAACGACCGTGTTCAACCCTGGCCGTCTCTCAACCAGGTATGCAATCA	37.125	16	60	36	35	48	35	16	45	32	38	26	32	35	26	43	48	44	35	23	22	21	41	38	28	28	30	47	53	52	35	55	53	18	37	40	25	39	48	44	34	40	60
