# Supplementary material for: Gene Expression Linked to Reepithelialization of Human Skin Wounds
Source: Int J Mol Sci. 2022 Dec 12;23(24):15746. doi: 10.3390/ijms232415746 (PMC9779194; doi:10.3390/ijms232415746)
Supplement: Supplementary file 1 [file ijms-23-15746-s001.zip › Table S2. Processed Raw nCounter Data by nSolver.xlsx]

## Sheet: Normalized Data
Probe Name	Class Name	Analyte Type	20191024_208592140221_2_04.RCC	20191024_208592140221_2s_03.RCC	20191024_208592150221_10_08.RCC	20191024_208592150221_10s_07.RCC	20191024_208592150221_12_12.RCC	20191024_208592150221_12s_11.RCC	20191024_208592150221_7_02.RCC	20191024_208592150221_7s_01.RCC	20191029_208592120221_19_02.RCC	20191029_208592120221_19s_01.RCC	20191029_208592120221_23_10.RCC	20191029_208592120221_23s_09.RCC	20191029_208592130221_15_06.RCC	20191029_208592130221_15s_05.RCC	20191029_208592130221_17_10.RCC	20191029_208592130221_17s_09.RCC	20191029_208592200221_32_04.RCC	20191029_208592200221_32s_03.RCC	20191029_208592200221_33_06.RCC	20191029_208592200221_33s_05.RCC	20191029_208592200221_36_12.RCC	20191029_208592200221_36s_11.RCC	20191029_208592210221_27_06.RCC	20191029_208592210221_27s_05.RCC	20191030_208592160221_54_12.RCC	20191030_208592160221_54s_11.RCC	20191030_208592170221_56_04.RCC	20191030_208592170221_56s_03.RCC	20191030_208592170221_57_06.RCC	20191030_208592170221_57s_05.RCC	20191030_208592170221_59_10.RCC	20191030_208592170221_59s_09.RCC	20191030_208592180221_48_12.RCC	20191030_208592180221_48s_11.RCC	20191030_208592190221_37_02.RCC	20191030_208592190221_37s_01.RCC	20191030_208592190221_40_08.RCC	20191030_208592190221_40s_07.RCC	20191030_208592190221_41_10.RCC	20191030_208592190221_41s_09.RCC
			ZINGEL_1_L_C_WOUND	ZINGEL_1_L_C_SKIN	ZINGEL_5_L_C_Wound	ZINGEL_5_L_C_SKIN	ZINGEL_6_L_C_WOUND	ZINGEL_6_L_C_SKIN	ZINGEL_4_R_C_WOUND	ZINGEL_4_R_C_SKIN	ZINGEL_11_R_C_WOUND	ZINGEL_11_R_C_SKIN	ZINGEL_10_R_C_WOUND	ZINGEL_10_R_C_SKIN	ZINGEL_9_R_C_WOUND	ZINGEL_9_R_C_SKIN	ZINGEL_8_R_C_WOUND	ZINGEL_8_R_C_SKIN	ZINGEL_16_L_C_WOUND	ZINGEL_16_L_C_SKIN	ZINGEL_17_R_C_WOUND	ZINGEL_17_R_C_SKIN	ZINGEL_18_L_C_WOUND	ZINGEL_18_L_C_SKIN	ZINGEL_14_R_C_WOUND	ZINGEL_14_R_C_SKIN	ZINGEL_27_L_C_WOUND	ZINGEL_27_L_C_SKIN	ZINGEL_28_L_C_WOUND	ZINGEL_28_L_C_SKIN	ZINGEL_29_R_C_WOUND	ZINGEL_29_R_C_SKIN	ZINGEL_30_R_C_WOUND	ZINGEL_30_R_C_SKIN	ZINGEL_24_L_C_WOUND	ZINGEL_24_L_C_SKIN	ZINGEL_19_R_C_WOUND	ZINGEL_19_R_C_SKIN	ZINGEL_20_L_C_WOUND	ZINGEL_20_L_C_SKIN	ZINGEL_21_R_C_WOUND	ZINGEL_21_R_C_SKIN
																				FLAG	FLAG	FLAG		FLAG				FLAG norm		FLAG norm					FLAG	FLAG norm
ACTC1	Endogenous	mRNA	1	1	1	1	1	1	1	1	1	1	1	1.07	1	7.01	1	1	1	1.42	1.98	1.77	1	2.12	1.36	1.33	1	144.61	1	196.7	1	1.53	1	1.06	10.27	55.2	1	1	1.43	1.03	1	1
ACVRL1	Endogenous	mRNA	55.56	45.14	129.74	63.96	104.77	57.12	57.13	56.67	100.19	61.3	82.97	68.57	56.45	84.86	85.12	58.66	160.78	101.35	164.8	107.1	173.43	105.22	217.39	98.88	110.66	144.61	100.77	415.26	132.23	134	154.19	112.35	55.23	98.62	193.82	116.83	216.26	109.65	218.02	132.28
ADAM17	Endogenous	mRNA	104.89	100.7	94.21	103.77	95.62	80.28	76.68	93.63	69.57	81.78	84.86	101.68	89.75	211.13	91.46	86.04	85.87	80.02	95.36	77.03	81.03	75.59	109.91	90.9	89.85	144.61	97.63	196.7	95.7	94.11	94.42	90.18	86.05	153.82	103.78	103.85	106.38	108.61	88.94	84.04
ADORA2A	Endogenous	mRNA	4.25	4.85	6.19	2.34	10.81	5.42	4.77	7.13	7.01	6.91	4.66	2.35	10.2	7.01	12.01	8.75	16.72	4.65	6.09	13.36	12.53	5.73	11.95	1.33	7.36	144.61	3.98	196.7	11.64	15.85	6.13	4.67	24.42	55.2	11.22	6.91	16.48	7.22	9.4	6.71
AGER	Endogenous	mRNA	1	3.02	2.16	4.24	6.65	3.76	2.68	1.22	4.41	7.55	2.78	1.07	2.19	7.01	4.73	3.11	6.02	6.07	6.09	1.77	4.78	2.12	3.79	1.33	1.69	144.61	3.98	196.7	3.14	2.05	2.79	1.51	10.27	55.2	4.48	6.05	2.21	3.08	1	1.03
ANGPT1	Endogenous	mRNA	2.94	2.41	6.19	8.98	6.23	2.94	4.07	5.66	9.62	3.07	7.49	5.55	6.5	7.01	3.99	1.5	4.38	3.23	2.12	2.75	6.72	2.12	3.79	9.76	8.5	144.61	3.35	196.7	7.64	1.53	11.89	1.06	10.27	55.2	12.06	7.78	1.43	1.03	1.31	1.03
BMP1	Endogenous	mRNA	144.36	125.12	234.71	117.99	214.95	111.29	124.85	122.46	204.78	111.21	182.5	123.05	140.32	330.38	166.82	114.48	267.79	190.95	260.02	223.83	355.01	185.67	331.67	227.91	194.27	144.61	174.31	196.7	214.79	192.31	222.45	192.58	260.68	55.2	356.24	231.07	286.18	169.66	339	249.34
CCL2	Endogenous	mRNA	91.74	56.13	124.89	56.37	192.5	62.49	88.54	72.19	125.93	65.14	155.61	125.18	92.84	119.93	262.31	161.45	391.27	121.26	238.2	115.94	142.42	52.3	176.58	69.62	122.01	144.61	75.63	196.7	292.34	210.72	265.23	175.69	332.59	153.82	176.99	83.94	231.96	148.96	293.27	169.17
CCL7	Endogenous	mRNA	1	1	1	1	1	1	1	1	1	1	1	1.07	1	7.01	1.75	1	3.55	1.42	1.98	1.77	1	2.12	1.36	1.33	1	144.61	1	196.7	1	1.53	1	1.06	10.27	55.2	1	1	1.43	1.03	1	1
CD36	Endogenous	mRNA	161.46	90.93	537.51	227	178.36	130.32	93.43	158.69	262.77	80.5	124.48	108.09	112.57	63.82	106.57	140.25	147.61	151.13	190.59	218.52	550.16	162.38	245.96	125.49	370.59	1354.72	383.6	415.26	793.71	884.33	436.04	291.81	137.41	98.62	171.1	123.75	194.85	185.17	204.68	250.76
CD40LG	Endogenous	mRNA	1	1	6.19	5.18	2.91	3.35	1	1.22	3.43	1.79	5.61	5.55	1	7.01	6.78	5.8	4.38	1.42	6.09	2.75	4.78	3.61	3.79	4.44	4.34	144.61	7.75	196.7	7.14	1.53	7.04	5.73	14.15	55.2	4.48	1	3.64	1.03	4.16	2.45
CD59	Endogenous	mRNA	904.73	606.19	664.29	518.97	749.63	570.37	703.58	591.9	981.17	651.89	703.74	697.7	421.52	421.57	457.04	305.29	434.08	377.24	807.56	901.21	674.87	399.48	660.92	515.23	1013.43	487.04	741.85	196.7	964.83	715.54	923.6	537.77	712.66	540.22	1219.63	945.09	969.71	788.38	929.12	640.25
CDH1	Endogenous	mRNA	292.35	391.29	121.66	338.86	212.04	370.61	367.09	411.52	155.58	307.65	236.27	400.76	312.37	407.54	214.75	339.37	340.23	530.83	299.7	510.34	226.42	344.44	421.47	549.81	139.41	144.61	195.68	218.57	158.25	365.7	132.64	563.11	455.85	595.42	254.41	540.05	323.28	533.85	316.13	443.73
COL1A1	Endogenous	mRNA	1229.67	2553.68	1292.5	1583.5	1628.98	2036.5	924.18	1017.73	1620.08	1462.59	937.23	1319.34	739.1	2547.05	1260.93	1918.41	1020.18	1933.03	1724.08	2668.07	2226.36	2700.59	3260.85	4334.15	1104.61	776.26	1215.11	1202.05	1375.13	2340.48	1380.52	2710.29	1154.36	1037.02	1355.11	1679.89	1810.21	1331.57	1843.59	1905.19
COL3A1	Endogenous	mRNA	1848.62	2970.65	2105.62	1835.65	2209.4	2661.42	1754.94	1856.81	2741.83	2518.36	2125	2492.14	1841.7	3003.01	2609.08	2874.58	1223.51	2324.11	1285.66	1727.16	1800.53	2596.86	2173.8	3416.33	2301	487.04	2100.67	196.7	1796.94	1432.11	2536.77	2102.24	969.46	1202.62	877.13	959.81	1908.67	1631.61	1484	1864.04
COL4A1	Endogenous	mRNA	678.46	319.87	999.39	502.85	1345.43	467.38	804.81	571.2	1332.06	408.74	1284.88	516.12	806.93	1445.73	1223.44	498.24	1819.49	675.89	1325.33	738.5	2142.36	581.54	2105.78	672.19	908.62	1354.72	1079.98	808.66	762.69	922.69	1589.86	751.01	1051.64	485.02	2005.6	835.18	2772	854.59	1746.43	881.46
COL4A3	Endogenous	mRNA	1	1	1	1	1	1	1	1	1.47	1	1	1.07	1	7.01	1	1	1	1.42	1.98	1.77	1	2.12	1.36	1.33	1	144.61	1	196.7	1.63	1.53	3.7	1.06	10.27	55.2	1	1	1.43	1.03	1	1
COL5A2	Endogenous	mRNA	64.77	61.62	75.64	66.8	91.47	60.42	57.13	72.93	114.85	52.98	60.8	61.1	77.42	49.79	116.46	97.31	130.32	68.65	87.43	85.87	155.34	62.88	171.13	138.79	80.01	144.61	78.15	196.7	74.69	106.38	95.02	76.46	75.78	55.2	96.21	85.67	162.03	69.29	98.47	101.07
COL5A3	Endogenous	mRNA	85.82	86.04	130.55	154.01	125.56	133.21	119.96	148.34	167.63	126.57	141.46	135.86	125.52	302.32	126.53	80.67	137.73	173.88	164.8	193.76	186.36	177.2	177.94	184.01	101.2	144.61	132.83	196.7	119.72	149.35	153.27	167.24	240.14	153.82	134.08	165.29	139.2	116.89	150.86	142.21
COL7A1	Endogenous	mRNA	491	774.69	294.46	982.51	421.59	980.63	963.98	1275	277.43	710.12	412.22	657.11	591.1	3388.83	373.48	456.91	927.99	1667.09	878.97	1560.91	720.75	1263.19	1168.39	1488.91	258.22	144.61	503.64	415.26	368.4	1022.42	416.93	1447.74	1154.36	1147.42	536.32	1135.5	547.32	1044.97	581.43	810.51
COL14A1	Endogenous	mRNA	27.93	51.86	63.53	34.57	43.24	64.15	24.32	34.49	46.43	42.75	48.53	46.14	11.44	7.7	34.76	42.29	20.84	38.78	31.88	38.12	39.03	45.95	65.01	89.57	59.2	144.61	29.12	196.7	31.66	46.54	62.56	58.51	14.15	55.2	53.29	42.4	15.05	38.25	34.17	48.57
COL17A1	Endogenous	mRNA	346.29	600.08	171.73	679.17	266.92	691.13	693.81	852.87	229.21	714.6	382.03	568.45	491.2	589.92	310.06	464.69	521.33	900.58	541.72	862.3	450	928.71	511.26	904.97	181.79	144.61	339.6	196.7	276.33	600.46	231.55	930.47	918.1	926.62	377.27	683.72	401.77	727.33	379.96	627.48
CSF2	Endogenous	mRNA	3.6	2.41	1	1	2.91	1.28	3.38	1	1	1.15	1	1.07	1	7.01	6.41	5.53	6.84	1.81	1.98	6.29	5.43	5.73	3.79	1.78	2.07	144.61	1	196.7	4.14	1.53	2.18	1.06	10.27	55.2	3.64	1.72	7.92	1.03	8.45	1
CSF2RA	Endogenous	mRNA	39.77	29.88	35.26	24.14	43.65	32.3	37.58	30.05	48.06	32.51	32.02	36.53	52.75	126.95	101.72	59.47	49.65	50.16	51.72	32.82	53.24	22.66	63.65	41.69	52.39	776.26	74.38	808.66	64.18	38.87	45.57	20.51	116.87	98.62	63.39	25.09	66.42	43.43	68.46	49.99
CSF3	Endogenous	mRNA	1	1	1	1	1	1	1	1	1	1	1	1.07	1	7.01	2.31	1	2.73	1.42	1.98	1.77	1	2.12	1.36	1.33	1	144.61	1	196.7	1	1.53	1	1.06	10.27	55.2	1	1	1.43	1.03	1	1
CTGF	Endogenous	mRNA	223.95	147.7	367.94	178.66	304.76	112.12	182.79	94.37	224	120.81	447.6	174.32	292.02	239.19	364.52	136.22	466.18	109.89	263.99	154.85	536.59	153.91	919.41	329	545.02	197.81	442.68	196.7	217.29	235.27	329.25	149.3	65.51	55.2	796.35	306.37	924.05	327.96	420.44	152.86
CTNNB1	Endogenous	mRNA	298.93	259.43	251.67	228.9	273.57	221.72	213.51	242.22	310.99	271.81	302.31	264.04	251.93	225.16	290.66	236.86	225.81	273.43	307.63	347.63	292.98	251.29	330.31	311.71	282.05	144.61	215.79	196.7	271.83	269.03	302.24	283.36	178.5	209.02	365.49	340.99	261.92	279.33	336.14	240.83
CTSG	Endogenous	mRNA	87.13	56.13	123.28	60.16	92.71	39.75	54.34	33.01	148.09	81.78	66.93	42.94	60.77	56.8	67.78	58.39	73.52	57.27	83.46	80.57	70.69	50.18	115.35	81.59	181.03	144.61	89.46	196.7	59.18	48.08	177.85	103.9	44.96	55.2	243.47	153.18	92.11	63.09	78.47	47.86
CTSK	Endogenous	mRNA	556.77	533.54	699.81	636.51	814.49	504.19	677.05	500.97	780.15	438.82	986.29	524.66	655.85	786.34	985.44	619.54	1164.24	808.14	853.18	763.26	1111.05	863.09	1696.26	1230.86	999.43	342.42	736.82	196.7	797.71	1019.35	1133.25	835.47	568.85	540.22	1209.53	655.16	1190.89	860.8	1538.29	1070.17
CTSV	Endogenous	mRNA	46.35	49.41	11.04	19.4	17.87	18.24	18.04	27.09	4.41	7.55	10.33	5.55	12.05	21.73	8.65	7.94	14.25	27.4	23.95	11.59	9.3	2.12	26.92	23.06	22.5	144.61	8.38	196.7	27.15	31.2	9.77	23.68	44.96	55.2	12.06	21.63	10.77	35.15	20.84	11.68
CXCL1	Endogenous	mRNA	22.67	20.11	22.34	11.82	68.18	25.68	71.09	21.18	30.8	12.03	57.02	36.53	34.87	14.71	168.31	60.54	126.21	18.87	16.01	13.36	13.83	7.84	28.28	11.09	33.85	144.61	36.67	415.26	209.78	37.34	49.82	20.51	106.6	98.62	21.31	2.58	46.45	31.01	57.03	57.08
CXCL2	Endogenous	mRNA	52.93	22.55	36.88	21.3	85.23	27.34	34.79	14.53	60.77	18.43	65.99	74.98	28.7	21.73	75.24	18.95	61.17	8.92	12.04	9.82	44.84	18.43	18.76	7.1	81.9	144.61	146.02	196.7	107.71	23.53	39.8	7.84	116.87	55.2	19.63	2.58	47.87	15.49	36.55	24.45
CXCL5	Endogenous	mRNA	1.62	1	1	1	1	1	1.98	1	1	1	3.25	1.07	2.8	7.01	30.66	5.53	103.98	1.42	1.98	1.77	1.55	2.12	16.04	3.11	1	144.61	2.1	196.7	17.65	5.11	1	1.06	10.27	55.2	14.58	1	9.34	1.03	8.93	1
CXCL8	Endogenous	mRNA	18.72	10.95	23.15	6.13	41.99	11.21	19.43	6.4	30.14	2.43	46.65	11.96	27.47	7.01	272.57	41.76	111.39	1.42	12.04	1.77	35.15	5.73	169.77	3.11	31.96	144.61	25.98	196.7	103.71	25.06	9.16	1.51	301.77	55.2	100.42	13.84	60.72	40.32	66.08	13.8
CXCL11	Endogenous	mRNA	1	1	1.35	4.24	1	1.7	1.98	1.22	1	1	1	1.07	1.57	7.01	2.68	1.77	1	1.42	1.98	1.77	1	2.12	5.15	1.33	1	144.61	5.87	196.7	7.64	8.18	2.18	1.06	10.27	55.2	3.64	1	3.64	1.03	1	1
CYR61	Endogenous	mRNA	572.56	247.22	768.45	324.64	728.01	268.04	593.98	306.54	662.53	264.14	1310.36	499.03	592.33	512.76	898.52	296.43	1854.89	308.98	1184.48	490.89	1125.91	319.03	1527.56	632.28	941.16	1065.49	970.62	611.96	1230.02	850.57	1123.84	467.05	681.84	650.62	971.38	277.81	1982.88	491.43	815.76	357.18
DEFB4	Endogenous	mRNA	237.1	173.35	10.23	22.25	110.59	99.3	202.34	180.86	61.42	63.86	525.43	221.31	99	14.71	447.52	699.78	223.34	40.2	43.78	18.67	13.83	9.96	105.83	110.85	20.61	144.61	58.66	196.7	211.79	124.8	13.41	7.84	2993.09	3465.81	12.9	6.91	1036.78	617.66	130.38	584.2
EGF	Endogenous	mRNA	1	2.41	1	1	1.24	1.28	1.98	1	1	1.15	1.36	1.07	1	7.01	1	1	2.73	1.81	2.12	1.77	1	3.61	1.36	1.33	1	144.61	1	196.7	3.14	1.53	1	1.06	10.27	55.2	1	1	2.21	1.03	1	1
EGFR	Endogenous	mRNA	100.94	156.86	94.21	170.12	86.89	149.34	109.49	154.99	62.4	109.29	62.68	107.03	95.3	155.01	69.45	92.48	108.92	145.44	111.23	163.69	128.85	164.5	137.12	145.44	90.6	144.61	91.97	196.7	100.71	150.88	86.53	215.8	75.78	98.62	119.77	186.93	117.8	197.59	137.05	157.11
EGR1	Endogenous	mRNA	121.99	73.22	114.4	82.91	170.88	140.24	136.02	86.98	188.49	100.33	247.12	132.66	66.94	56.8	176.51	112.07	413.5	158.24	273.91	89.41	259.38	73.47	217.39	109.52	89.47	144.61	225.84	415.26	243.81	176.97	277.06	222.14	301.77	374.62	110.51	86.54	350.4	129.3	199.44	117.38
ENTPD1	Endogenous	mRNA	85.16	47.58	140.24	61.11	133.46	63.32	70.39	72.93	86.83	54.26	77.31	50.42	55.84	119.93	119.63	111.26	79.28	64.38	115.2	101.79	97.83	43.83	141.2	90.9	146.22	144.61	88.83	196.7	112.71	103.32	152.36	88.07	44.96	55.2	175.31	113.37	201.99	113.78	175.63	131.57
EREG	Endogenous	mRNA	16.09	28.66	10.23	12.77	6.65	14.93	14.54	21.18	9.29	23.55	20.7	11.96	12.67	7.01	27.3	27.26	13.43	8.92	12.04	31.05	9.95	3.61	7.87	19.07	11.9	144.61	17.81	196.7	12.14	5.11	10.07	13.12	10.27	55.2	12.06	12.97	10.77	16.53	11.31	22.32
F3	Endogenous	mRNA	54.9	64.68	48.18	64.9	70.26	96.41	94.83	77.37	38.94	63.86	63.63	66.44	65.7	49.79	102.65	35.85	57.88	68.65	75.53	85.87	66.81	48.07	75.9	114.84	45.2	144.61	50.49	196.7	60.68	66.49	41.02	85.96	168.23	98.62	76.85	74.42	79.27	75.5	146.1	64.17
F5	Endogenous	mRNA	4.25	1	1.35	1	3.32	2.11	1	1	4.73	1.79	3.25	5.55	2.19	7.01	2.87	2.58	1.08	4.65	6.09	1.77	2.84	2.12	1.36	1.33	1	144.61	1.47	196.7	1	1.53	1.27	1.51	10.27	55.2	2.8	6.05	1.43	1.03	2.74	1.03
F13A1	Endogenous	mRNA	422.59	346.73	770.06	399.53	694.33	344.55	332.88	373.08	562.84	378.03	469.3	377.26	279.68	470.67	653.25	646.38	636.58	463.99	545.69	480.28	881.01	543.43	738.47	625.63	923.38	197.81	620.55	196.7	907.29	660.3	960.31	445.93	116.87	153.82	962.13	455.23	1079.59	626.97	1080.1	741.7
FGF2	Endogenous	mRNA	23.33	10.34	40.11	20.35	27.02	16.58	8.96	7.87	41.87	19.71	17.4	10.89	23.15	42.77	40.17	12.5	21.66	13.18	14.03	31.05	39.67	3.61	28.28	13.75	49.74	144.61	24.72	196.7	31.66	18.92	31.31	14.17	24.42	55.2	64.23	42.4	33.6	15.49	32.74	12.38
FGF7	Endogenous	mRNA	56.87	39.65	107.13	30.78	93.13	32.3	26.41	18.96	75.11	34.43	49.48	21.58	26.85	28.74	79.9	40.95	66.94	23.14	109.25	54.04	106.88	18.43	66.37	37.69	104.6	144.61	83.17	196.7	74.69	51.15	148.12	42.68	10.27	55.2	107.15	47.59	56.43	33.08	94.66	53.53
FGF10	Endogenous	mRNA	10.83	5.46	28.8	8.98	21.2	7.9	3.38	3.44	12.55	7.55	2.78	4.49	1.57	28.74	5.29	1	5.2	1.81	27.91	36.35	30.63	2.12	14.68	16.41	19.85	144.61	23.47	196.7	7.14	11.25	23.72	21.56	10.27	55.2	19.63	23.36	13.63	10.32	16.07	9.55
FLG1	Endogenous	mRNA	149.62	426.09	58.68	474.41	122.23	553.82	355.22	890.57	95.96	502.8	408.45	616.52	338.88	162.02	118.88	254.57	334.47	626.11	150.91	467.9	286.52	410.06	258.21	951.52	124.28	144.61	306.92	196.7	234.8	447.02	192.72	534.61	14.15	55.2	114.72	235.4	112.09	319.68	18.93	475.65
FLG2	Endogenous	mRNA	368	798.5	115.2	861.17	144.27	806.93	681.24	1361.49	108.01	838.09	436.75	860.05	420.9	632.01	155.44	457.18	622.59	1563.28	470.31	1180.65	515.27	1117.12	512.62	1728.34	131.84	920.88	333.95	415.26	299.35	1177.4	279.18	1669.42	240.14	761.02	306.59	804.88	336.13	1138.09	126.57	938.92
FN1	Endogenous	mRNA	115.42	90.93	203.22	120.83	154.66	88.13	79.47	89.93	166.66	129.77	163.63	91	121.82	105.9	160.1	110.19	172.3	98.51	131.07	135.4	232.24	141.21	206.51	144.11	202.22	197.81	162.99	196.7	152.24	153.95	175.73	146.13	75.78	55.2	230.85	196.45	176.3	112.75	183.73	119.51
GNAQ	Endogenous	mRNA	70.69	55.52	102.28	84.81	110.59	76.97	73.88	69.23	96.28	70.26	80.61	73.91	66.32	42.77	93.51	72.35	100.69	75.76	75.53	68.19	124.32	58.65	130.32	96.22	114.82	144.61	105.17	196.7	100.71	107.92	124.45	114.46	44.96	55.2	162.69	87.4	142.05	95.16	144.19	98.23
HBEGF	Endogenous	mRNA	31.22	17.67	19.11	6.13	19.12	9.97	29.21	4.18	7.34	8.19	27.31	4.49	20.69	7.7	30.47	6.87	48.83	7.5	21.96	4.52	15.77	5.73	28.28	12.42	20.61	144.61	19.07	196.7	26.15	12.79	18.87	7.84	55.23	55.2	18.79	10.37	49.3	15.49	52.27	15.93
HGF	Endogenous	mRNA	4.91	5.46	15.88	10.87	19.12	6.25	13.15	7.13	15.48	12.03	6.08	13.03	5.89	7.01	19.28	5.26	24.95	1.81	12.04	18.67	11.24	2.12	18.76	1.78	17.2	144.61	11.52	196.7	16.65	9.72	22.81	7.84	10.27	55.2	19.63	6.05	9.34	5.15	16.07	3.87
HIF1A	Endogenous	mRNA	458.11	297.28	322.72	144.53	473.97	265.97	295.88	183.82	345.2	170.72	416.47	295.01	361.7	176.05	515.98	289.72	490.05	229.34	486.18	315.8	318.18	177.2	474.53	247.86	408.81	342.42	391.77	196.7	371.9	310.46	495.81	273.86	270.95	319.42	644.03	350.51	630.09	248.29	541.9	280.56
IFNG	Endogenous	mRNA	2.94	1.18	1	1	1	1	1	1	1.15	1	2.31	1.07	1	7.01	1.19	1	1	1.81	2.12	1.77	1	2.12	2.43	1.33	1	144.61	1	196.7	1	2.05	1	1.51	10.27	55.2	1.12	1	1.43	1.03	1	1
IGF1	Endogenous	mRNA	138.44	65.29	241.98	73.44	161.32	55.05	59.22	52.97	220.42	70.26	88.63	68.57	25	147.99	152.64	78.25	176.42	81.44	313.58	123.02	250.33	48.07	152.09	110.85	221.89	144.61	88.83	196.7	75.19	101.78	295.27	149.3	10.27	55.2	367.18	168.76	199.13	104.47	209.92	107.45
IL10	Endogenous	mRNA	1.62	1.8	2.16	1	3.32	1	1	1	3.43	1	3.25	1.28	4.65	7.01	6.41	3.92	2.73	1.81	2.12	1.77	2.2	2.12	1.36	1.78	2.44	144.61	2.73	196.7	4.14	1.53	4.91	1.06	10.27	55.2	2.8	1	1.43	1.03	3.21	1
IL1A	Endogenous	mRNA	2.94	4.85	1.35	1	5.4	2.11	2.68	1	1.15	1.15	2.78	1.07	1	7.01	7.16	4.99	3.55	1.42	2.12	1.77	1	2.12	1.36	1.33	1.31	144.61	1	196.7	2.13	2.05	1.88	3.62	10.27	55.2	1	1	1.43	1.03	8.45	3.87
IL1B	Endogenous	mRNA	12.15	9.73	14.27	1	19.54	11.21	15.94	1.22	12.88	2.43	28.72	17.3	19.45	7.7	227.81	47.12	92.46	7.5	6.09	2.75	14.47	3.61	67.74	9.76	27.04	144.61	10.27	196.7	53.17	20.46	10.68	4.67	65.51	55.2	17.95	3.45	43.59	15.49	46.55	12.38
IL2	Endogenous	mRNA	1.62	1	1	1	1	1	1	1	1	1.15	1	1.07	1	7.01	1	1	1	1.42	1.98	1.77	1	2.12	1.36	1.33	1	144.61	1	196.7	1	1.53	1	1.06	10.27	55.2	1	1	1.43	1.03	1	1
IL4	Endogenous	mRNA	1	1	1	1	1	1	1	1	1	1	1	1.07	1	7.01	1	1	1	1.42	1.98	1.77	1	2.12	1.36	1.33	1	144.61	1	196.7	1	1.53	1	1.06	10.27	55.2	1	1	1.43	1.03	1	1
IL6	Endogenous	mRNA	57.53	6.07	26.38	2.34	72.76	11.62	29.9	4.92	105.41	10.75	88.63	9.83	28.7	14.71	130.07	14.65	137.73	3.23	37.83	8.05	50.01	12.08	75.9	9.76	60.71	144.61	37.29	196.7	82.69	35.8	62.56	5.73	168.23	55.2	38.99	4.32	159.18	21.7	67.51	15.93
IL6ST	Endogenous	mRNA	208.82	160.52	341.3	240.27	315.98	244.05	204.43	218.57	281.99	235.98	281.09	246.95	185.95	309.33	289.36	230.95	300.72	289.07	285.81	319.33	410.58	261.88	383.37	331.66	359.24	144.61	342.12	218.57	380.91	428.61	411.77	361.48	250.41	374.62	469.84	285.6	498.8	295.88	418.54	326.67
ITGA1	Endogenous	mRNA	25.96	18.89	67.56	27.93	58.2	25.68	13.85	26.36	48.39	27.39	44.29	41.87	22.54	42.77	44.65	23.51	34.83	25.98	45.77	25.74	40.32	29.01	86.78	39.02	62.22	144.61	44.21	196.7	45.67	35.8	65.29	36.34	10.27	55.2	52.45	40.67	69.28	32.05	42.74	36.51
ITGA2	Endogenous	mRNA	48.32	49.41	23.96	48.79	38.66	57.94	56.43	69.23	29.17	40.83	42.4	52.55	36.72	35.76	32.15	34.24	37.3	95.67	71.56	128.32	49.37	90.41	59.57	69.62	17.2	144.61	29.75	196.7	31.16	57.28	40.71	104.96	44.96	209.02	23	72.69	43.59	49.64	35.12	36.51
ITGA3	Endogenous	mRNA	125.28	90.32	66.76	80.07	98.53	87.72	185.58	100.28	80.97	91.37	132.5	69.64	137.85	77.85	106.94	71.54	111.39	80.02	99.33	80.57	88.14	90.41	119.43	93.56	88.71	144.61	108.94	196.7	93.7	91.04	86.83	66.96	168.23	153.82	106.31	77.02	152.04	97.23	173.72	81.91
ITGA4	Endogenous	mRNA	12.8	13.39	44.95	16.56	23.28	11.62	22.92	11.57	28.84	6.91	27.78	16.24	18.84	42.77	43.71	33.17	42.24	18.87	33.87	8.05	33.86	22.66	48.69	29.71	29.31	144.61	36.04	196.7	34.16	25.06	37.98	25.79	24.42	55.2	33.94	12.1	45.02	21.7	56.56	40.05
ITGA5	Endogenous	mRNA	152.91	78.72	231.48	161.59	294.36	133.21	143.7	106.94	198.91	118.25	219.29	113.43	174.85	463.66	220.53	118.24	411.03	200.9	339.37	195.53	434.49	175.08	390.18	169.38	199.19	144.61	212.02	196.7	277.33	391.78	328.64	233.75	219.59	55.2	442.07	218.95	524.49	177.93	497.6	267.08
ITGA6	Endogenous	mRNA	225.26	170.29	132.16	176.76	219.52	212.62	277.73	200.83	167.63	211.67	294.77	238.4	281.53	218.14	252.43	155.01	193.71	138.33	188.6	193.76	150.17	153.91	222.83	181.35	141.3	144.61	182.48	218.57	132.23	92.58	177.55	155.63	466.12	319.42	213.18	215.49	173.45	190.35	289.46	167.04
ITGAV	Endogenous	mRNA	120.68	112.3	123.28	153.06	125.14	129.49	114.37	140.94	127.23	111.85	131.55	111.3	119.97	267.24	163.83	122.8	110.57	125.53	125.12	121.25	126.91	139.09	134.4	124.16	159.46	144.61	126.54	218.57	122.72	101.78	138.1	99.68	55.23	55.2	125.66	122.89	107.81	121.03	117.52	98.23
ITGB1	Endogenous	mRNA	145.01	103.14	228.25	118.94	273.99	168.37	219.79	147.6	254.62	172	291.46	180.73	222.33	21.73	246.65	162.79	313.07	183.84	323.5	248.59	300.09	192.02	365.69	223.92	223.03	144.61	213.27	218.57	223.8	244.48	312.56	264.36	353.13	264.22	395.79	220.69	341.83	183.11	391.39	255.02
ITGB3	Endogenous	mRNA	50.3	21.94	57.07	27.93	87.31	37.68	37.58	27.09	94.65	32.51	79.67	40.8	58.92	70.83	78.78	36.12	102.33	33.09	57.67	22.2	86.85	39.6	69.1	24.39	90.6	144.61	59.92	196.7	74.69	57.28	108.98	33.18	75.78	55.2	133.24	38.07	104.95	39.29	103.23	52.82
ITGB5	Endogenous	mRNA	229.21	202.65	254.9	215.63	222.02	196.08	188.37	203.04	202.5	168.8	199.48	164.7	199.52	309.33	189.57	166.01	312.25	314.67	414.76	374.16	436.43	348.67	409.22	395.51	204.49	144.61	220.82	196.7	215.29	336.55	279.79	364.65	219.59	98.62	575.03	352.24	331.84	233.8	409.01	288.36
ITGB6	Endogenous	mRNA	2.28	4.85	4.58	1	2.91	4.59	2.68	1.22	4.41	1.15	1	1.07	3.42	7.01	2.68	1.5	3.55	1.81	1.98	1.77	1	2.12	3.79	1.33	1	144.61	1	196.7	2.63	1.53	2.18	1.51	10.27	55.2	2.8	3.45	1.43	1.03	1	1
IVL	Endogenous	mRNA	172.64	156.25	41.72	66.8	77.75	88.55	182.79	101.02	102.15	142.56	132.03	68.57	152.04	49.79	84	88.99	217.58	122.69	170.75	195.53	139.19	153.91	165.69	158.74	76.98	144.61	171.17	196.7	103.71	138.61	68.63	134.52	609.94	705.82	165.21	184.34	203.42	168.62	188.49	132.99
KLK8	Endogenous	mRNA	145.01	188	23.15	135.05	96.45	176.23	200.24	213.39	60.77	152.8	144.76	155.09	147.1	70.83	96.87	159.84	163.25	230.77	123.14	156.62	81.03	124.28	127.6	211.95	38.77	144.61	114.6	196.7	82.69	106.38	62.86	197.86	147.68	98.62	107.15	177.41	156.32	220.35	122.76	249.34
KRT6A	Endogenous	mRNA	12010.4	7301.54	3157.76	3248.08	6111.82	6093.29	13130	6632.54	6551.15	4983.73	9559.15	4778.99	10615	2343.62	7684.96	5030.6	8744.1	3511.57	8363.94	4519.82	3841.82	5327.72	7856.65	7980.16	4875	1354.72	9639.58	808.66	4842.64	2786.99	4438.77	3145.21	10645.9	9869	6054.12	5827.27	9400.39	6917.64	8429.24	5910.03
KRT10	Endogenous	mRNA	8974.83	27637.3	3612.37	29734.4	6219.08	27154.7	20842.7	35374.2	4785.93	29279.8	11134.2	25186.5	18747.6	35102.7	6927.7	22548.7	17434.4	41793.3	15351	38397.9	15875.1	32519.8	18772	49412.4	3992.28	12200.7	10397.6	13397.3	10215.5	30866.6	6480.33	34241.3	14405.5	38186.5	9705.44	26164.3	7441.13	28427	2786.65	23368.8
LAMA3	Endogenous	mRNA	18.72	20.11	15.88	22.25	19.95	17.83	21.53	23.4	16.79	20.99	22.59	21.58	24.39	7.01	23.57	19.21	30.72	40.2	16.01	29.28	23.52	24.78	28.28	29.71	16.44	144.61	19.07	415.26	24.15	28.13	17.05	30.01	24.42	55.2	30.57	28.55	23.61	22.73	37.03	15.22
MAPK1	Endogenous	mRNA	74.63	89.71	70.79	95.24	97.7	89.79	91.34	96.59	78.04	86.26	90.04	83.53	83.59	77.85	93.14	90.06	98.22	107.04	107.27	123.02	121.09	122.16	143.92	148.1	75.09	144.61	100.77	196.7	103.71	169.3	98.66	129.24	137.41	319.42	144.18	119.42	150.62	128.27	132.76	142.21
MAPK3	Endogenous	mRNA	159.49	164.19	202.41	222.26	192.08	173.74	173.02	201.56	168.61	184.79	187.22	204.22	181.02	260.23	140.33	159.03	324.59	361.6	355.24	375.93	371.17	278.81	391.54	355.61	130.71	342.42	193.16	196.7	223.8	407.13	200.91	343.54	312.04	374.62	333.52	321.08	403.19	330.03	309.47	301.13
MIF	Endogenous	mRNA	920.52	805.82	583.54	809.03	764.6	706.85	827.15	772.29	609.75	567.43	873.08	839.76	964.8	1123.05	619.12	649.33	1118.14	994.44	1174.56	1369.9	1049.66	1087.48	1054.1	1059.27	553.34	144.61	821.04	196.7	706.65	727.82	645.99	861.86	1421.44	1589.02	855.25	1020.39	929.75	1043.93	1280.14	954.53
MKI67	Endogenous	mRNA	87.13	87.88	36.07	81.97	89.39	93.92	145.79	127.64	63.7	65.78	127.78	104.89	127.99	91.87	95.94	70.47	103.16	88.56	150.91	115.94	77.15	128.51	97.67	113.51	60.71	144.61	91.35	196.7	73.19	87.97	60.74	63.79	147.68	153.82	80.22	67.5	104.95	62.05	115.62	97.52
MMP1	Endogenous	mRNA	531.78	29.88	262.97	82.91	1101.37	249.84	748.96	138.73	1727.59	295.49	2312.27	117.71	1559.27	162.02	2302.07	335.34	2533.19	21.72	398.89	85.87	568.9	100.99	1576.54	339.64	632.8	144.61	816.64	196.7	715.15	209.19	1298.6	33.18	1544.71	650.62	824.12	84.81	1901.54	146.89	671.92	111
MMP2	Endogenous	mRNA	1044.18	526.21	1260.2	704.76	1262.27	476.07	784.56	469.92	1496.92	635.89	1154.22	395.42	1035.72	1165.14	1266.52	624.1	1742.94	624.69	2227.97	1214.26	2203.75	1150.99	3557.44	1659.18	1384.22	342.42	1027.19	196.7	829.23	789.19	1692.72	908.3	1072.19	761.02	2978.39	1193.49	2286.83	1074.97	2799.51	1447.6
MMP3	Endogenous	mRNA	18.07	1.8	11.04	4.24	30.35	8.31	21.53	1.22	87.49	19.07	193.35	10.89	88.52	7.7	125.22	24.04	332	1.42	1.98	2.75	22.87	3.61	167.05	31.04	49.36	144.61	30.38	196.7	83.69	21.99	49.82	3.62	250.41	55.2	24.68	4.32	100.67	6.18	64.18	9.55
MMP7	Endogenous	mRNA	10.83	5.46	13.46	3.29	23.28	14.52	4.07	1.96	23.3	6.27	15.04	40.8	3.42	7.01	10.33	9.02	37.3	21.72	14.03	18.67	11.24	12.08	3.79	3.11	1	144.61	4.61	196.7	29.15	1.53	15.53	13.12	10.27	55.2	16.27	43.26	6.49	5.15	5.12	6.71
MMP8	Endogenous	mRNA	1.62	1	1	1	1	1	1	1	1	1	1	1.07	1	7.01	2.12	1	2.73	1.42	1.98	1.77	1	2.12	1.36	1.33	1	144.61	1	196.7	1	5.11	1	1.06	10.27	55.2	1	1	1.43	1.03	1	1
MMP9	Endogenous	mRNA	7.54	8.51	39.3	25.09	49.06	28.99	28.51	16.75	51.65	20.35	57.97	33.33	29.32	7.01	90.72	50.88	162.43	21.72	49.74	9.82	64.23	20.55	99.03	33.7	39.14	144.61	31.01	196.7	80.69	35.8	31.01	24.73	116.87	98.62	38.14	15.57	102.1	71.36	39.41	15.22
MMP10	Endogenous	mRNA	1	1.18	1	1	1.24	1	1.28	1	1	1	1	1.07	1	7.01	3.61	1	2.73	1.42	1.98	1.77	2.2	2.12	2.43	1.33	1	144.61	1	196.7	1	1.53	1.88	1.06	10.27	55.2	5.33	1	1.43	1.03	1.31	1
MMP12	Endogenous	mRNA	2.28	1	1	3.29	4.99	4.59	4.07	1	9.94	1	13.16	5.55	8.35	7.01	26	9.55	2.73	1.42	6.09	1.77	7.37	2.12	1.36	1.33	2.44	144.61	1	196.7	5.64	1.53	2.49	2.56	10.27	55.2	4.48	1	16.48	6.18	13.69	2.45
MMP13	Endogenous	mRNA	1	1	1	1	1	1	1	1	1	1	1	1.07	1	7.01	1	1	1	1.42	1.98	1.77	1	2.12	1.36	1.78	1	144.61	1	196.7	1	1.53	1	1.06	10.27	55.2	1	1	1.43	1.03	1	1
MMP14	Endogenous	mRNA	156.85	97.03	176.57	99.03	283.97	138.59	196.05	159.43	381.36	152.16	339.11	120.91	251.32	77.85	338.79	186.94	271.91	119.84	208.44	156.62	400.25	187.78	303.1	214.61	228.33	144.61	213.9	196.7	188.27	129.4	325.91	148.24	137.41	55.2	400	175.68	279.05	128.27	314.23	196.13
MMP28	Endogenous	mRNA	28.59	57.35	32.03	97.13	25.36	75.31	82.96	116.55	21.67	84.34	31.55	64.3	44.74	183.07	23.57	55.44	46.36	119.84	41.8	123.02	55.83	115.81	55.49	93.56	20.61	144.61	30.38	196.7	24.65	83.37	25.85	121.85	44.96	98.62	52.45	93.46	32.18	78.61	32.74	74.11
MT1A	Endogenous	mRNA	26.62	17.67	75.64	15.61	29.52	10.79	9.66	10.83	55.88	31.23	15.04	14.1	18.22	28.74	15.92	24.04	43.89	41.63	19.98	6.29	28.04	3.61	20.12	13.75	148.11	144.61	24.72	196.7	118.72	72.63	55.88	46.9	14.15	209.02	57.5	25.95	65	36.19	63.7	47.86
MT2A	Endogenous	mRNA	1188.23	547.58	1711.58	556.88	727.18	322.22	656.11	326.5	1305.67	692.84	950.91	321.72	882.78	1003.8	1232.58	689.31	2181.69	654.55	1242.01	451.98	1099.42	560.37	1769.73	603.02	2108.41	144.61	860.01	196.7	1772.92	908.88	841.99	418.49	1863.15	1644.22	1355.11	611.88	2266.85	939.43	1465.9	856.63
MYC	Endogenous	mRNA	254.86	267.36	150.73	186.24	223.26	200.63	269.36	268.84	208.03	248.78	280.61	311.04	287.08	421.57	267.91	236.32	448.89	388.62	349.29	329.94	238.05	172.97	349.36	259.83	167.79	144.61	254.13	196.7	217.29	301.25	212.74	337.2	620.21	761.02	224.96	243.19	321.86	287.61	413.3	294.04
NF1	Endogenous	mRNA	50.3	50.02	72.41	53.53	66.52	52.15	50.15	58.14	48.06	50.42	52.78	54.69	43.5	7.7	54.35	47.93	44.71	57.27	47.75	46.96	52.6	45.95	43.25	60.31	50.5	144.61	45.46	196.7	58.18	58.82	59.22	64.85	44.96	55.2	58.34	49.32	46.45	43.43	46.08	67.01
NGF	Endogenous	mRNA	1	1.8	1	5.18	1	1.7	3.38	1	2.78	5.63	1.36	1.28	4.04	14.71	2.68	2.04	3.55	8.92	2.12	1.77	3.49	2.12	1.36	1.78	3.2	144.61	1	196.7	2.13	5.11	1	1.06	10.27	55.2	4.48	2.58	1.43	4.11	2.74	3.87
PDGFA	Endogenous	mRNA	10.17	15.84	19.11	13.72	26.19	17.41	11.75	16.01	27.54	26.11	26.83	13.03	15.75	7.01	16.86	10.09	22.49	23.14	8.08	25.74	23.52	20.55	7.87	7.1	10.01	144.61	29.75	196.7	19.65	9.72	26.15	14.17	10.27	55.2	16.27	12.1	13.63	7.22	26.07	8.84
PF4	Endogenous	mRNA	1	1	1.35	1	4.15	1.7	4.77	1	4.08	2.43	1	1.07	1	7.01	1.37	1.5	2.73	1.42	1.98	1.77	2.2	2.12	1.36	3.11	1.31	144.61	17.18	196.7	8.64	5.11	1.88	1.06	10.27	55.2	1	1	2.21	3.08	1	1
PI3	Endogenous	mRNA	3502.9	1597.64	536.7	654.52	1527.95	1453.35	3539.31	1809.49	996.48	731.87	3672.68	1435.77	2180.25	1137.08	2033.67	1826.63	3213.96	856.49	1242.01	699.59	638.04	655.63	1984.69	1645.87	580.96	197.81	2529.94	196.7	1914.52	1669.94	791.02	913.58	7892.95	8985.8	1334.07	1104.34	4865.4	2295.86	3673.02	3834.18
PI3K	Endogenous	mRNA	22.67	20.72	25.57	28.88	25.77	36.85	29.9	35.23	31.45	28.03	24.95	31.19	26.85	7.01	24.69	27	14.25	21.72	23.95	15.13	20.29	24.78	22.84	21.73	31.2	144.61	29.75	196.7	37.16	23.53	28.58	15.23	10.27	55.2	33.94	16.43	17.91	16.53	16.55	23.03
PLAT	Endogenous	mRNA	88.45	87.88	79.67	47.84	91.47	52.57	59.92	36.71	117.46	35.07	64.57	52.55	41.04	49.79	95.38	48.47	136.08	57.27	228.28	128.32	161.16	41.72	214.67	94.89	148.11	144.61	68.72	196.7	76.19	80.3	93.81	63.79	24.42	55.2	177.84	87.4	120.65	55.84	159.44	111.71
PLAU	Endogenous	mRNA	89.76	70.17	96.63	67.75	143.02	86.07	130.43	85.5	141.9	93.29	135.8	84.59	118.12	119.93	165.14	114.75	173.95	94.24	152.89	96.49	126.91	75.59	130.32	65.63	112.55	144.61	93.23	196.7	172.76	123.26	185.44	99.68	116.87	55.2	138.28	88.27	164.89	91.02	171.34	123.06
PLAUR	Endogenous	mRNA	31.88	14.62	38.49	21.3	50.3	18.65	21.53	19.7	51.32	16.51	54.67	29.05	38.57	42.77	90.34	38.54	72.7	30.25	51.72	25.74	65.52	26.9	85.42	29.71	45.58	144.61	24.72	196.7	57.67	38.87	44.66	24.73	44.96	55.2	85.27	34.61	67.85	17.56	82.75	36.51
POLR1B	Endogenous	mRNA	23.99	27.44	25.57	20.35	21.2	19.48	43.17	33.75	26.56	35.71	26.36	24.78	28.7	28.74	28.23	27.8	36.48	53	16.01	22.2	13.18	20.55	24.2	25.72	19.09	144.61	12.78	196.7	23.65	28.13	22.81	22.62	34.69	55.2	20.47	25.95	26.47	23.77	26.07	34.38
PTGS2	Endogenous	mRNA	31.22	12.17	27.19	5.18	35.34	19.89	26.41	15.27	62.4	26.75	34.38	17.3	30.55	7.01	117.2	26.19	104.8	17.45	45.77	32.82	70.04	7.84	62.29	12.42	18.33	144.61	26.61	196.7	56.17	32.73	39.2	20.51	209.32	55.2	96.21	19.03	119.22	20.67	99.42	23.74
RAC1	Endogenous	mRNA	746.87	687.39	724.85	813.77	845.67	801.97	926.28	841.78	673.29	695.4	849.5	764.99	781.65	1319.46	814.78	795.85	866.25	856.49	892.86	851.69	809.28	852.5	886.76	930.24	815.92	197.81	854.98	196.7	835.24	806.07	773.72	836.52	1246.81	1368.22	866.19	792.77	983.98	885.63	795.28	789.23
RHOA	Endogenous	mRNA	154.88	162.97	149.12	166.33	152.17	173.33	161.85	171.25	198.26	170.08	196.65	120.91	182.25	147.99	212.89	194.99	119.62	109.89	101.32	92.95	131.43	147.56	137.12	149.43	170.44	144.61	164.88	196.7	172.76	95.64	168.44	91.24	127.14	98.62	155.11	98.65	84.97	114.82	127.52	142.21
S100A7	Endogenous	mRNA	7513.28	4119	1484.68	1701.04	2373.21	2222.61	4519.45	3149.07	1433.39	1494.58	4418.45	2938.61	3761.38	744.25	2382.08	4547.82	2828.71	1614.48	1876.84	1030.32	1192.47	2313.19	2090.81	2247.11	1072.08	144.61	3516.07	196.7	3834.91	2489.31	1614.74	1974.51	7482.06	10255.4	1034.5	1533.62	3084.51	2882.51	2659.95	4398.19
S100A8	Endogenous	mRNA	5572.22	3175.78	1109.2	1243.19	2217.71	2385.15	4543.89	3200.82	2038.74	1925.21	5679.33	3747.18	4117.81	884.55	3443.93	5765.64	3976.23	2127.86	2749.72	1373.43	1238.99	1633.66	2728.89	2523.79	1180.67	144.61	3154.05	196.7	3044.84	2352.75	1557.1	1627.2	7482.06	8985.8	1410.65	1772.49	4218.97	3765.06	2911.91	4423.73
S100A9	Endogenous	mRNA	15565.6	8356.48	3376.59	4066.15	6365.02	5902.21	11703	7617.26	4457.19	4062.33	12503.6	8026.07	10226.5	5170.58	7455.17	11096.4	12013	5629.08	9288.4	4709.06	4230.83	4980.54	8739.62	7207.33	3434.95	776.26	8359.32	611.96	7796.28	7416.28	4353.82	5438.07	28920.2	32721.7	5509.66	6002.96	14915.7	12607.2	10253.4	13441.5
SERPINB3	Endogenous	mRNA	11.49	10.95	3.77	7.08	7.9	8.73	15.24	13.05	4.08	3.07	9.38	5.55	6.5	7.01	8.84	10.36	12.61	10.34	6.09	1.77	1	5.73	3.79	3.11	2.44	144.61	7.75	196.7	5.64	2.05	5.22	5.73	14.15	55.2	6.17	3.45	10.77	6.18	10.83	15.93
SERPINE1	Endogenous	mRNA	91.08	37.81	78.06	37.41	271.49	72.83	104.6	50.01	85.86	23.55	207.03	40.8	123.05	77.85	225.38	62.42	558.38	40.2	115.2	15.13	272.3	58.65	274.53	58.98	128.44	144.61	301.27	196.7	138.23	69.56	169.96	22.62	137.41	55.2	198.03	50.19	398.91	81.71	321.37	77.65
SLC30A1	Endogenous	mRNA	30.56	51.86	48.99	39.31	33.26	36.44	15.24	32.27	44.48	43.39	44.76	34.39	33.02	49.79	45.21	45.51	24.13	20.29	21.96	31.05	33.21	22.66	35.08	24.39	51.63	144.61	47.98	218.57	45.17	25.06	36.47	24.73	24.42	55.2	35.62	23.36	60.72	28.94	29.88	37.22
SLC39A2	Endogenous	mRNA	17.41	19.5	2.16	26.04	4.15	21.55	20.13	27.09	7.66	25.47	21.65	25.85	13.29	7.01	6.22	16.8	21.66	34.52	23.95	25.74	7.37	20.55	9.23	41.69	5.09	144.61	15.92	196.7	8.64	17.39	7.34	30.01	10.27	55.2	2.8	24.22	7.92	23.77	5.12	25.15
SLC39A4	Endogenous	mRNA	56.87	66.51	26.38	30.78	39.91	34.78	33.39	25.62	40.9	44.03	52.78	40.8	63.24	147.99	46.7	46.59	76.82	78.6	87.43	82.34	64.23	77.7	59.57	81.59	34.23	144.61	38.55	196.7	38.16	68.02	28.58	41.62	127.14	55.2	79.38	77.02	57.86	73.43	75.61	59.92
SOD1	Endogenous	mRNA	47.67	58.57	68.37	56.37	43.65	39.75	51.54	46.32	55.23	40.19	49.01	46.14	47.82	91.87	41.1	45.25	48.83	60.11	93.38	98.25	82.32	45.95	73.18	97.55	47.47	144.61	54.89	196.7	51.17	52.68	49.51	65.9	55.23	98.62	63.39	60.57	52.15	42.39	65.13	56.37
STAT3	Endogenous	mRNA	761.34	558.57	740.19	513.28	669.39	474.83	597.47	568.25	603.56	477.85	566.47	676.33	591.72	1059.92	638.52	668.38	712.31	616.16	829.38	651.84	625.12	422.76	771.12	555.13	742.9	144.61	575.92	196.7	751.68	746.23	735.5	705.62	1154.36	2361.82	875.45	749.49	1036.78	771.82	732.41	706.23
TFPI	Endogenous	mRNA	31.88	17.67	40.92	26.99	38.66	24.03	21.53	20.44	54.25	26.11	24.95	27.98	25.62	7.01	33.08	29.68	43.06	20.29	45.77	27.51	35.8	22.66	37.8	41.69	44.44	144.61	53.63	196.7	42.66	43.47	46.78	30.01	10.27	55.2	65.91	37.2	47.87	44.46	40.84	27.99
TGFA	Endogenous	mRNA	23.33	25.6	11.04	9.92	14.96	22.79	20.83	21.92	16.79	11.39	15.99	18.37	17.6	7.01	18.53	13.04	25.78	20.29	17.99	11.59	17.06	3.61	21.48	8.43	14.17	144.61	10.9	196.7	14.14	29.66	10.98	20.51	34.69	55.2	22.16	22.49	19.33	17.56	18.45	23.03
TGFB1	Endogenous	mRNA	193.69	173.35	256.51	200.46	281.06	218	274.24	204.52	253.32	179.04	278.26	197.82	264.27	540.82	326.66	231.49	425.02	300.45	283.83	271.58	388.61	244.94	360.24	271.81	269.95	342.42	328.92	196.7	340.38	295.12	298.91	215.8	373.67	540.22	321.73	248.38	391.78	259.67	345.19	256.44
TGFB2	Endogenous	mRNA	2.94	3.63	2.16	8.03	5.4	7.9	2.68	2.7	2.45	8.83	6.55	6.62	2.8	7.01	6.22	4.19	3.55	8.92	1.98	1.77	4.78	2.12	13.31	4.44	11.15	144.61	3.35	196.7	5.14	3.58	8.55	9.95	10.27	55.2	2.8	5.18	1.43	3.08	8.93	1
TGFBR3	Endogenous	mRNA	89.76	73.83	229.86	175.81	111.84	96.82	69.7	75.15	100.84	84.98	68.35	124.12	60.15	169.04	84.56	83.62	103.16	135.49	162.81	167.23	257.44	122.16	221.47	190.66	190.11	144.61	112.09	196.7	123.22	134	124.15	168.3	24.42	55.2	239.27	195.59	210.55	189.31	180.87	148.6
THBD	Endogenous	mRNA	200.27	227.07	153.96	153.06	240.31	210.14	227.47	240.01	216.51	198.23	192.88	165.77	202.6	330.38	290.66	201.16	426.67	345.96	369.13	360.01	318.18	213.19	375.21	309.05	192.76	342.42	196.93	196.7	208.28	270.57	208.8	337.2	609.94	540.22	388.21	244.92	468.84	334.16	388.05	313.19
TIMP1	Endogenous	mRNA	508.76	268.58	928.33	355.92	1024.87	301.54	406.88	249.62	936.86	351.16	994.78	350.56	534.37	288.29	1245.82	521.05	2464.04	451.19	1134.89	466.13	2420.22	534.96	1323.49	525.87	1143.21	776.26	807.84	196.7	1147.46	746.23	938.17	406.87	712.66	540.22	1493.12	550.43	2627.88	617.66	1291.1	594.84
TIMP2	Endogenous	mRNA	655.44	545.14	1094.67	817.57	1096.38	642.74	667.28	591.16	963.58	621.18	684.87	489.41	585.55	1340.51	785.12	521.86	1095.92	803.88	1470.15	1185.96	1494.88	1102.3	1935.71	1272.1	1114.45	1210.1	831.09	218.57	770.19	939.57	1335.01	1095.15	414.76	650.62	1824.68	1037.7	1190.89	954.95	1691.18	1187.23
TIMP3	Endogenous	mRNA	133.83	194.71	302.54	269.66	205.39	185.32	85.75	129.12	223.35	138.72	168.35	259.77	71.25	218.14	99.3	96.23	154.19	193.79	182.65	260.97	306.55	153.91	248.68	261.16	229.08	342.42	184.36	415.26	240.81	370.3	298.6	395.26	44.96	55.2	306.59	291.65	221.97	270.02	210.4	242.25
TLR4	Endogenous	mRNA	38.46	21.33	65.14	30.78	49.06	20.72	24.32	21.18	47.09	24.83	35.33	21.58	25	42.77	60.13	44.71	57.88	41.63	25.93	18.67	66.17	31.13	62.29	39.02	63.36	144.61	51.75	196.7	58.68	26.6	77.43	40.57	44.96	55.2	87.79	57.98	65	34.12	83.71	54.95
TMPRSS6	Endogenous	mRNA	2.28	1.8	1.35	1	1	2.11	2.68	1.96	1	1	1	1.07	1	7.01	2.31	2.04	1	1.42	1.98	1.77	1	2.12	7.87	1.33	1	144.61	1	196.7	1.63	1.53	1	1.06	10.27	55.2	1	4.32	1.43	6.18	1.31	1
TNF	Endogenous	mRNA	10.17	12.17	11.04	9.92	17.46	14.52	14.54	10.83	8.32	12.67	10.8	26.92	4.04	14.71	24.5	24.58	20.84	17.45	14.03	8.05	13.83	12.08	11.95	9.76	5.85	144.61	6.5	196.7	19.15	6.65	17.35	9.95	10.27	55.2	12.9	8.64	16.48	11.35	13.69	19.48
VEGFA	Endogenous	mRNA	97	77.5	92.59	76.28	83.98	97.23	72.49	83.28	85.21	92.01	62.68	108.09	63.85	112.92	100.98	77.72	123.74	107.04	99.33	94.72	98.48	88.29	112.63	100.21	78.12	144.61	105.17	415.26	98.2	112.52	97.45	117.63	229.86	319.42	108.83	95.19	120.65	129.3	108.95	97.52
VTN	Endogenous	mRNA	1	1	1	1	1	1	1.28	1	1	1	1	1.07	1	7.01	1.37	1	1.08	1.42	1.98	1.77	1	2.12	3.79	1.33	1	144.61	1.47	196.7	1	5.11	1	1.06	10.27	55.2	1	1	1.43	1.03	3.21	1.03
VWF	Endogenous	mRNA	74.63	39.04	144.27	77.23	198.32	103.02	78.07	87.72	197.61	122.09	186.27	128.39	74.34	112.92	154.69	90.6	193.71	118.42	184.64	119.48	253.56	111.57	255.49	104.2	149.25	144.61	236.53	196.7	152.74	253.69	257.04	149.3	34.69	55.2	235.9	127.21	154.9	87.92	275.17	183.36
WAS	Endogenous	mRNA	49.64	33.54	90.17	52.58	70.26	42.64	62.71	57.41	63.05	42.75	61.74	41.87	61.39	42.77	102.65	68.59	148.43	88.56	87.43	57.58	149.53	62.88	141.2	90.9	85.31	144.61	105.17	196.7	114.22	114.06	102	70.12	86.05	55.2	126.5	65.76	209.12	82.74	160.39	86.88
WISP1	Endogenous	mRNA	3.6	1.18	7.81	2.34	3.74	2.11	1.98	1	6.04	1	1	1.07	3.42	7.01	17.42	4.19	4.38	1.81	1.98	1.77	4.13	5.73	1.36	1.33	13.04	144.61	2.1	196.7	2.13	1.53	5.82	1.06	10.27	55.2	13.74	1.72	1.43	1.03	3.21	1.74
WNT5A	Endogenous	mRNA	14.12	19.5	2.96	3.29	9.97	8.31	23.62	8.61	17.76	8.83	11.74	15.17	7.12	7.7	12.19	7.14	15.9	23.14	8.08	11.59	11.89	5.73	13.31	25.72	4.71	144.61	14.67	196.7	5.64	14.32	9.77	14.17	10.27	55.2	2.8	12.1	7.92	24.8	9.4	13.8
ABCF1	Housekeeping	mRNA	47.01	43.31	44.15	38.36	45.32	52.57	46.66	45.58	54.25	48.5	56.08	54.69	47.2	49.79	58.08	57.32	51.3	55.85	49.74	48.73	53.24	45.95	69.1	53.66	42.93	144.61	41.06	196.7	40.16	51.15	40.71	60.62	86.05	55.2	56.66	65.76	56.43	61.02	52.27	60.63
GUSB	Housekeeping	mRNA	93.05	90.93	109.55	102.82	110.18	94.34	82.26	75.89	96.93	80.5	76.84	80.32	80.5	183.07	91.65	72.35	107.27	104.2	97.35	115.94	130.14	130.63	133.04	89.57	106.12	144.61	102.03	196.7	96.2	146.28	119.6	123.96	75.78	55.2	121.45	110.77	139.2	93.09	131.81	96.1
HPRT1	Housekeeping	mRNA	65.43	56.13	65.14	62.06	62.78	47.6	58.53	52.97	59.47	70.9	67.87	57.89	67.55	35.76	57.14	60.27	61.17	35.94	55.69	45.2	46.78	39.6	36.44	56.32	53.14	144.61	54.26	196.7	55.67	37.34	51.94	43.73	55.23	55.2	49.93	51.92	40.74	50.67	47.03	45.73
LDHA	Housekeeping	mRNA	466	437.08	434.16	399.53	464.83	478.96	464.83	464.75	424.04	421.54	444.77	394.35	447.42	147.99	459.65	444.57	328.71	287.65	329.45	310.49	307.19	335.97	288.14	342.3	548.04	144.61	572.15	196.7	537.02	342.68	467.6	274.92	240.14	595.42	304.06	259.63	398.91	346.58	315.66	347.24
PTEN	Housekeeping	mRNA	191.72	245.38	212.1	199.51	192.5	210.97	216.3	250.36	230.84	230.22	215.05	235.2	212.47	225.16	226.87	224.51	203.59	276.27	198.52	188.45	197.34	213.19	209.23	201.31	226.06	144.61	222.07	196.7	230.3	209.19	234.28	193.63	199.05	153.82	214.86	187.8	184.86	187.24	188.97	188.33
RPLP0	Housekeeping	mRNA	4782.25	5157.46	4214.74	6266.31	4359.76	5125.93	5413.73	5735.8	3993.9	4551.18	4370.81	5183.8	5010.74	11259.4	3854.83	4900.71	5427.5	7356.94	6933.6	8182.65	6221.72	7182.16	6053.98	6555.54	4076.65	1933.17	4232.56	415.26	4595.96	6105.9	4412.98	6988.82	7101.99	7937	5447.39	6630.43	5180.77	6546.2	6325.95	7017.48
NEG_A	Negative	SYSTEM	1	6.94	1	7.47	3.99	5.1	1	7.65	2.52	1.8	1	4.2	3.54	1	1	4.6	1	1	1	1	5.4	1.71	1	3.34	1.46	1	1.34	1.11	1	5.33	1	3.43	4.38	1.79	1.33	1	1	1.97	1	1.46
NEG_B	Negative	SYSTEM	1	1	1	1	1	1	1	1	1	1	1	1	1.54	2.1	1	1	1	1	1	1	1	1	1.79	1	2.46	1	1	1	1	2.33	1	1	5.38	1	1	1	1.55	1	1	4.46
NEG_C	Negative	SYSTEM	6.47	1	1	1.47	1	6.1	3.83	2.65	1.52	6.8	4.89	1	1.54	1	8.37	8.6	3.32	1	4.07	2.55	1.4	1.71	1	1.34	1	1	1.34	1	1.27	1.33	5.19	2.43	1	1	3.33	3.99	1	1	3.74	1.46
NEG_D	Negative	SYSTEM	1	1	1	1	1	1	1.83	1	1.52	1	1	1	4.54	1.1	4.37	1	1	1	1	1	1	1	1	1	1.46	1	1	1.11	3.27	1	5.19	1	1	1	1	1	1	1	1	1
NEG_E	Negative	SYSTEM	4.47	2.94	1.67	7.47	1	7.1	5.83	6.65	3.52	2.8	4.89	7.2	1	4.1	4.37	10.6	2.32	3.27	2.07	5.55	10.4	1	5.79	2.34	7.46	9.37	8.34	1.11	2.27	1.33	2.19	5.43	2.38	3.79	1	5.99	2.55	7.97	5.74	5.46
NEG_F	Negative	SYSTEM	1	1	6.67	1.47	1.99	2.1	1	1	1	1	2.89	1	1.54	3.1	1	3.6	2.32	1	1	1.55	1	1.71	1	4.34	1.46	5.37	2.34	4.11	1.27	1.33	1	1	1.38	3.79	1.33	1	3.55	1	2.74	2.46
NEG_G	Negative	SYSTEM	1	1	1	1	1	1	1	1	1	1	1	1	1	1	1	1	1	1	1	1	1	1	1	1	1	1	1	1	1	1	1	1	1	1	1	1	1	1	1	1
NEG_H	Negative	SYSTEM	1	1	1	1	1	1	1	1	1	1	1	1	1	1	1	1	1	1	1	1	1.4	1	1	1	1	1	1	1	1	1	1	1	1	1	1	1	1	1	1	1
POS_A	Positive	SYSTEM	32747.5	30946.9	35549.7	33952.5	32631	37438.1	26086.8	35370.7	31427.5	28602.8	28498.9	26523.2	39661.5	40876.1	30448.4	33671.6	30546.3	26027.3	25645.1	35080.6	37108.4	28902.7	36863.8	33989.3	41171.5	41915.4	37520.3	29960.1	41853.3	36372.3	33144.2	32642.4	30019.4	28043.8	31142.3	35918	37330.6	31531	31301.7	45720.5
POS_B	Positive	SYSTEM	6459.47	6045.94	6990.67	6770.47	6487.99	7615.1	5212.83	6798.65	6044.52	5536.8	5632.89	5467.2	7625.54	7964.1	6109.37	6761.6	5671.31	4900.27	4907.07	6723.55	7096.4	5525.71	7255.79	6789.34	8334.46	8293.37	7379.34	5744.11	8425.27	7251.33	6444.19	6401.43	5832.38	5591.79	6236.33	6980.99	7361.55	6207.97	6248.74	8944.46
POS_C	Positive	SYSTEM	1756.47	1608.94	1961.67	1884.47	1674.99	1932.1	1410.83	1840.65	1530.52	1542.8	1520.89	1415.2	2046.54	2091.1	1679.37	1851.6	1566.32	1338.27	1378.07	1858.55	1938.4	1492.71	1919.79	1783.34	2172.46	2293.37	2088.34	1636.11	2290.27	1970.33	1782.19	1742.43	1660.38	1424.79	1633.33	1985.99	1974.55	1718.97	1710.74	2423.46
POS_D	Positive	SYSTEM	530.47	509.94	573.67	532.47	523.99	575.1	430.83	531.65	525.52	481.8	452.89	402.2	641.54	659.1	458.37	538.6	478.32	367.27	402.07	573.55	547.4	437.71	591.79	513.34	692.46	645.37	593.34	447.11	653.27	562.33	528.19	492.43	450.38	448.79	479.33	577.99	609.55	527.97	524.74	775.46
POS_E	Positive	SYSTEM	95.47	105.94	109.67	106.47	89.99	116.1	74.83	99.65	78.52	101.8	77.89	80.2	119.54	126.1	102.37	120.6	79.32	70.27	65.07	115.55	114.4	73.71	113.79	88.34	123.46	129.37	126.34	82.11	125.27	116.33	97.19	83.43	85.38	89.79	76.33	108.99	102.55	113.97	114.74	131.46
POS_F	Positive	SYSTEM	33.47	31.94	45.67	31.47	12.99	41.1	28.83	34.65	21.52	29.8	30.89	23.2	38.54	45.1	39.37	29.6	20.32	20.27	19.07	38.55	34.4	25.71	25.79	27.34	43.46	50.37	48.34	33.11	51.27	50.33	15.19	34.43	37.38	22.79	36.33	44.99	40.55	30.97	35.74	55.46

## Sheet: Ark2
									3	4	13	14	17	18	19	20	25	26	33	34	41	42	45	46	51	52	53	54	59	60	65	66	83	84	87	88	89	90	93	94	107	108	109	110	115	116	117	118
