# Supplementary material for: Gene Expression Linked to Reepithelialization of Human Skin Wounds
Source: Int J Mol Sci. 2022 Dec 12;23(24):15746. doi: 10.3390/ijms232415746 (PMC9779194; doi:10.3390/ijms232415746)
Supplement: Supplementary file 1 [file ijms-23-15746-s001.zip › Table S3. Expression of All Genes in Wounds versus Skin..xlsx]

## Sheet: Ark1
Gene	AveExpr 1	Log2FC 2	p Value	q Value
ACTC1	0.25	-0.27	1.60E-01	2.68E-01
ACVRL1	6.67	0.54	1.39E-02	3.01E-02
ADAM17	6.54	-0.05	6.00E-01	7.08E-01
ADORA2A	2.81	0.65	2.01E-02	4.16E-02
ANGPT1	1.94	0.67	6.97E-02	1.36E-01
AGER	1.54	0.23	4.58E-01	5.95E-01
BMP1	7.61	0.43	1.45E-02	3.10E-02
CCL2	7.06	0.85	6.81E-04	2.78E-03
CCL7	0.33	-0.11	6.04E-01	7.08E-01
CD36	7.55	0.43	1.67E-01	2.73E-01
CD40LG	1.63	0.49	1.57E-01	2.68E-01
CD59	9.35	0.37	1.93E-02	4.07E-02
CDH1	8.33	-0.50	4.74E-06	3.47E-05
COL1A1	10.72	-0.50	7.97E-03	1.94E-02
COL3A1	10.96	-0.23	1.36E-01	2.37E-01
COL4A1	9.86	1.07	3.72E-06	2.87E-05
COL4A3	0.34	-0.08	7.06E-01	7.55E-01
COL5A2	6.41	0.37	2.13E-02	4.36E-02
COL5A3	7.16	-0.10	4.15E-01	5.55E-01
COL7A1	9.59	-1.03	4.14E-05	2.13E-04
COL14A1	5.25	-0.26	2.95E-01	4.36E-01
COL17A1	8.99	-0.96	2.15E-07	2.49E-06
CSF2	1.25	0.67	7.28E-02	1.40E-01
CSF2RA	5.45	0.49	1.12E-02	2.51E-02
CSF3	0.33	-0.11	6.02E-01	7.08E-01
CTGF	7.99	1.15	1.14E-05	6.60E-05
CTNNB1	8.10	0.10	1.37E-01	2.37E-01
CTSG	6.22	0.58	5.71E-03	1.53E-02
CTSK	9.68	0.41	1.02E-02	2.32E-02
CTSV	3.93	-0.17	6.21E-01	7.08E-01
CXCL1	4.85	1.27	2.54E-03	8.15E-03
CXCL2	4.69	1.43	1.11E-04	5.51E-04
CXCL5	1.42	1.45	1.34E-02	2.96E-02
CXCL8	4.18	2.60	9.62E-06	5.82E-05
CXCL11	0.81	0.10	7.54E-01	8.00E-01
CYR61	5.82	1.36	2.12E-08	4.92E-07
DEFB4	6.36	0.48	5.19E-01	6.44E-01
EGF	0.50	-0.11	6.40E-01	7.23E-01
EGFR	6.93	-0.61	7.67E-06	5.10E-05
EGR1	7.17	0.82	3.25E-04	1.41E-03
ENTPD1	6.56	0.50	9.35E-03	2.17E-02
EREG	3.71	-0.23	3.43E-01	4.77E-01
F3	6.09	-0.01	9.57E-01	9.64E-01
F5	1.07	0.14	6.63E-01	7.34E-01
F13A1	9.13	0.46	9.10E-03	2.14E-02
FGF2	4.37	0.86	2.65E-03	8.17E-03
FGF7	5.63	1.09	8.07E-06	5.10E-05
FGF10	3.20	0.44	3.55E-01	4.88E-01
FLG1	8.06	-1.51	3.54E-05	1.89E-04
FLG2	9.09	-1.75	4.98E-08	9.61E-07
FN1	7.11	0.44	1.21E-03	4.35E-03
GNAQ	6.47	0.41	3.47E-03	1.03E-02
HBEGF	3.85	1.55	1.37E-07	1.82E-06
HGF	3.17	1.16	3.87E-04	1.63E-03
HIF1A	8.35	0.85	7.62E-08	1.18E-06
IFNG	0.42	-0.10	6.46E-01	7.24E-01
IGF1	6.87	0.81	5.71E-03	1.53E-02
IL1A	1.05	0.17	6.19E-01	7.08E-01
IL1B	3.71	1.96	2.96E-04	1.37E-03
IL2	0.27	-0.24	2.13E-01	3.41E-01
IL4	0.25	-0.27	1.60E-01	2.68E-01
IL6	4.59	2.82	2.66E-10	3.70E-08
IL6ST	8.21	0.22	9.27E-02	1.67E-01
IL10	1.01	0.81	3.93E-03	1.12E-02
ITGA1	5.20	0.51	7.20E-03	1.79E-02
ITGA2	5.60	-0.60	1.60E-03	5.43E-03
ITGA3	6.59	0.42	3.20E-04	1.41E-03
ITGA4	4.62	0.82	1.08E-03	4.07E-03
ITGA5	7.81	0.71	2.58E-03	8.15E-03
ITGA6	7.57	0.21	8.87E-02	1.62E-01
ITGAV	6.97	-0.01	9.13E-01	9.36E-01
ITGB1	7.73	0.76	1.78E-03	5.90E-03
ITGB3	5.71	1.13	5.53E-08	9.61E-07
ITGB5	8.08	0.11	5.31E-01	6.53E-01
ITGB6	1.05	0.37	1.90E-01	3.08E-01
IVL	6.95	0.11	5.98E-01	7.08E-01
KLK8	7.03	-0.67	3.06E-03	9.24E-03
KRT6A	12.52	0.58	4.14E-03	1.15E-02
KRT10	14.05	-1.73	7.97E-09	2.77E-07
LAMA3	4.49	0.02	9.16E-01	9.36E-01
MAPK1	6.72	-0.09	4.15E-01	5.55E-01
MAPK3	7.96	-0.13	4.56E-01	5.95E-01
MIF	9.77	-0.04	7.01E-01	7.55E-01
MKI67	6.49	0.04	8.01E-01	8.37E-01
MMP1	8.42	3.16	1.00E-09	6.97E-08
MMP2	10.15	0.96	1.19E-04	5.70E-04
MMP3	4.11	2.97	7.95E-06	5.10E-05
MMP7	3.28	0.47	2.76E-01	4.21E-01
MMP8	0.39	-0.18	4.58E-01	5.95E-01
MMP9	5.04	1.19	8.65E-04	3.34E-03
MMP10	0.54	0.29	2.55E-01	3.95E-01
MMP12	1.84	1.20	6.34E-03	1.63E-02
MMP13	0.26	-0.29	1.29E-01	2.31E-01
MMP14	7.62	0.95	1.44E-07	1.82E-06
MMP28	5.85	-1.35	5.31E-09	2.46E-07
MT1A	4.72	0.73	5.43E-02	1.09E-01
MT2A	9.73	1.11	7.01E-07	6.09E-06
MYC	8.08	-0.02	8.50E-01	8.82E-01
NF1	5.64	0.13	4.76E-01	6.13E-01
NGF	1.26	-0.47	1.62E-01	2.68E-01
PDGFA	3.93	0.38	8.31E-02	1.54E-01
PF4	0.88	0.16	6.09E-01	7.08E-01
PI3	10.58	0.53	7.66E-02	1.44E-01
PI3K	4.52	0.17	3.02E-01	4.38E-01
PLAT	6.35	0.78	8.28E-04	3.29E-03
PLAU	6.82	0.63	4.61E-07	4.27E-06
PLAUR	5.24	1.06	1.24E-06	1.02E-05
POLR1B	4.69	-0.13	3.09E-01	4.39E-01
PTGS2	4.91	1.71	2.70E-07	2.89E-06
RAC1	9.70	-0.02	7.82E-01	8.23E-01
RHOA	7.15	0.15	2.18E-01	3.44E-01
S100A7	11.18	0.17	4.96E-01	6.33E-01
S100A8	11.30	0.26	3.09E-01	4.39E-01
S100A9	12.83	0.24	2.52E-01	3.93E-01
SERPINB3	2.64	0.14	6.71E-01	7.35E-01
SERPINE1	6.53	1.96	1.71E-08	4.76E-07
SLC30A1	5.06	0.10	5.10E-01	6.43E-01
SLC39A2	3.83	-1.38	3.03E-05	1.68E-04
SLC39A4	9.26	-0.17	4.12E-01	5.55E-01
SOD1	5.77	-0.01	9.67E-01	9.67E-01
STAT3	9.38	0.18	6.81E-02	1.35E-01
TFPI	4.98	0.56	3.94E-03	1.12E-02
TGFA	4.02	0.23	2.82E-01	4.26E-01
TGFB1	8.09	0.32	8.45E-03	2.02E-02
TGFB2	2.07	-0.14	6.65E-01	7.34E-01
TGFBR3	7.02	-0.02	9.34E-01	9.48E-01
THBD	8.04	0.10	5.13E-01	6.43E-01
TIMP1	9.42	1.39	3.09E-07	3.07E-06
TIMP2	9.89	0.33	7.60E-02	1.44E-01
TIMP3	7.66	-0.22	2.99E-01	4.37E-01
TLR4	5.33	0.68	1.22E-03	4.35E-03
TMPRSS6	0.73	-0.31	2.90E-01	4.33E-01
TNF	3.69	0.07	7.06E-01	7.55E-01
VEGFA	6.58	-0.04	6.15E-01	7.08E-01
VTN	0.42	-0.13	6.11E-01	7.08E-01
VWF	7.09	0.60	5.98E-03	1.57E-02
WAS	6.27	0.67	1.27E-03	4.41E-03
WISP1	1.35	1.00	7.12E-03	1.79E-02
WNT5A	3.39	-0.28	3.22E-01	4.52E-01

## Sheet: Ark2
0.0543
