# Supplementary material for: Gene Expression Linked to Reepithelialization of Human Skin Wounds
Source: Int J Mol Sci. 2022 Dec 12;23(24):15746. doi: 10.3390/ijms232415746 (PMC9779194; doi:10.3390/ijms232415746)
Supplement: Supplementary file 1 [file ijms-23-15746-s001.zip › Table S4. nCounter CodeSet Design Report.xlsx]

## Sheet: Definitions
	nCounter™ CodeSet Design Report - Definitions
	Section 1: Customer Order Info
	[CUSTOMER_INFO]
	Section 2: GX CodeSet summary
	[CODESET_SUMMARY]
	Organism
	CodeSet Name:	Name of CodeSet
	CodeSet Version:	Version of CodeSet
	CodeSet Quote Number:	Quote Number for CodeSet request
	CodeSet PO Number:	Purchase Order number for CodeSet
	CodeSet Part Number	Nanostring Part Number for this version of this CodeSet
	CodeSet Requested Probe Count:	Number of requested targets
	CodeSet Confirmed Probe Count:	Number of unique sequence targets
	CodeSet Discrepancy Notes:
	CodeSet Ideal Probe Count:	Number of probe pairs passing ideal quality cutoffs
	CodeSet cutoff Exceptions	Summary of non-ideal exceptions in this library:
		Xhyb = Cross hybridization potential
	Xhyb: Tm: GC: Structural:	Tm = out of range melting temp
	(some probes may be in multiple categories):	GC = GC content ratio out of range
		Structural = secondary structure interference potential
	Section 3: Transcript Variant Coverage columns:
	[TRANSCRIPT_VARIANT_DATA]
	1 - Customer Identifiers:	Default is RefSeq Gene name, otherwise specified by customer
	2 - HUGO Gene:	Common name for mRNA target sequence, as defined by RefSeq.
	3 - Nanostring Internal Identifiers
	4 - Total # of Isoforms	Total # of isoforms annotated for this RefSeq Build for this gene
	5 - Isoforms Hit By Probe	The accession #'s of the isoforms hit by the probe
	6 - # Hit:	Count of all known transcript variants that the probe will hit.
	7 - Isoforms Not Hit By Probe	The accession #'s of the isoforms NOT hit by the probe (if any)
	8 - # Not Hit:	Count of all known transcript variants that the probe will NOT hit.
	Section 4: Detailed probe information columns:
	[CODESET_DETAILS]
	1 - Customer Identifiers:	Default is RefSeq Gene name, otherwise specified by customer
	2 - Accession number:	Accession number of requested target sequence.
	3 - Position:	Region in the target mRNA being probed.
	4 - Target Sequence:	Sequence of target region.
	5 - Tm of capture probe
	6 - Tm of reporter probe
	7 - Exception Flags
	[ T ]	Tm out of range
	[ X ]	Cross hyb signal expected
	[ V ]	Variant Specific
	[ S ]	Structural issues (GC%, hairpins, poly-G etc)
	[ C ]	Custom Sequence
	8 - HUGO Gene:	Common name for mRNA target sequence, as defined by RefSeq.
	9 - Nanostring Internal Identifiers	Our internal ProbeID - used to determine the specific probe used
	10 – Design Remarks	Any comments or notes about the probe - examples would be cross-hybridzation

## Sheet: Version History
	nCounter™ CodeSet Design Report - Revision History
	Version	Date	Reason For Changes
	1	2019-06-20	Initial Version

## Sheet: Design Data
	nCounter™ CodeSet Design Report - Data
	CUSTOMER INFORMATION
	Customer Name:	Lise Mette Rahbek Gjerdrum
	Customer Institute:	Sjaelland University Hospital - Roskilde
	CODESET SUMMARY
	CodeSet Name:	Gjerdrum_wound
	CodeSet Report Version:	1
	CodeSet Design Report Date	2019-06-20
	CodeSet Quote #:	SQ-35604
	CodeSet PO:
	CodeSet requested probe count:	146
	CodeSet confirmed probe count:	145
	CodeSet confirmed HK count:	6
	CodeSet notes:	* One gene submitted in duplicate - CTNNB1, extra probe dropped from codeset * Please review Design Remarks column for probes that may cross hybridize with non-target transcripts
	CodeSet Tier1 pass:	138
	CodeSet Probe Exceptions:	Xhyb	TM	GC	Structure
	Exception Count:	7	0	0	0
	ISOFORM COVERAGE
	IMPORTANT: Please review the "Isoform Coverage" tab - this table includes important information about the specific isoforms that will be targeted by the probes in this CodeSet
	CODESET DETAILS
	Customer Identifier	Accession	Position	Target Sequence	Tm CP	Tm RP	Flags	HUGO Gene	NSID	Design Remarks
1	ABCF1	NM_001090.2	851-950	GATGTCCTCCCGCCAAGCCATGTTAGAAAATGCATCTGACATCAAGCTGGAGAAGTTCAGCATCTCCGCTCATGGCAAGGAGCTGTTCGTCAATGCAGAC	79	82	HK	ABCF1	NM_001090.2:850
2	ACTC1	NM_005159.4	2006-2105	GCTGACAGTTGGGCCAGCCACATCCCATTGCAAATACCCTCTAAACATATCAAGACCATTGTGTGTGTGCAAAACAAATGTGAGGAAGCAGGAGCCAAAC	86	85		ACTC1	NM_005159.4:2005
3	ACVRL1	NM_000020.1	1711-1810	TCTGCCCGACTCACCGCGCTGCGGATCAAGAAGACACTACAAAAAATTAGCAACAGTCCAGAGAAGCCTAAAGTGATTCAATAGCCCAGGAGCACCTGAT	78	81		ACVRL1	NM_000020.1:1710
4	ADAM17	NM_003183.4	1596-1695	AGAACGCAGCAATAAAGTTTGTGGGAACTCGAGGGTGGATGAAGGAGAAGAGTGTGATCCTGGCATCATGTATCTGAACAACGACACCTGCTGCAACAGC	80	82		ADAM17	NM_003183.4:1595
5	ADORA2A	NM_000675.3	1096-1195	TGGCCATCGTCCTCTCCCACACCAATTCGGTTGTGAATCCCTTCATCTACGCCTACCGTATCCGCGAGTTCCGCCAGACCTTCCGCAAGATCATTCGCAG	79	83	X	ADORA2A	NM_000675.3:1095	also targets SPECC1L-ADORA2A readthrough transcript (NR_103546) @ 100%
6	RAGE	NM_001136.3	341-440	GAAAGGAGACCAAGTCCAACTACCGAGTCCGTGTCTACCAGATTCCTGGGAAGCCAGAAATTGTAGATTCTGCCTCTGAACTCACGGCTGGTGTTCCCAA	83	78		AGER	NM_001136.3:340
7	ANGPT1	NM_001146.3	2081-2180	GTGGTAGTTATGTGAAGTCACCAAGGTTCTTGACCGTGAATCTGGAGCCGTTTGAGTTCACAAGAGTCTCTACTTGGGGTGACAGTGCTCACGTGGCTCG	82	83		ANGPT1	NM_001146.3:2080
8	BMP1	NM_001199.1	1306-1405	GCTTCTTTGCAGTCTACGAAGCCATCTGCGGGGGTGATGTGAAAAAGGACTATGGCCACATTCAATCGCCCAACTACCCAGACGATTACCGGCCCAGCAA	80	82		BMP1	NM_001199.1:1305
9	CCL2	NM_002982.3	124-223	CATTCCCCAAGGGCTCGCTCAGCCAGATGCAATCAATGCCCCAGTCACCTGCTGTTATAACTTCACCAATAGGAAGATCTCAGTGCAGAGGCTCGCGAGC	84	85		CCL2	NM_002982.3:123
10	CCL7	NM_006273.2	121-220	CAGCCCCCAGGGGCTTGCTCAGCCAGTTGGGATTAATACTTCAACTACCTGCTGCTACAGATTTATCAATAAGAAAATCCCTAAGCAGAGGCTGGAGAGC	82	78		CCL7	NM_006273.2:120
11	CYR61	NM_001554.3	1391-1490	AAGGGAGAAGAGTGTCAGAATCAGAATCATGGAGAAAATGGGCGGGGGTGGTGTGGGTGATGGGACTCATTGTAGAAAGGAAGCCTTGCTCATTCTTGAG	82	79		CCN1	NM_001554.3:1390
12	CTGF	NM_001901.2	1101-1200	ACCACCCTGCCGGTGGAGTTCAAGTGCCCTGACGGCGAGGTCATGAAGAAGAACATGATGTTCATCAAGACCTGTGCCTGCCATTACAACTGTCCCGGAG	82	81		CCN2	NM_001901.2:1100
13	WISP1	NM_080838.1	851-950	TGTAGGAATCCCAATGACATCTTTGCTGACTTGGAATCCTACCCTGACTTCTCAGAAATTGCCAACTAGGCAGGCACAAATCTTGGGTCTTGGGGACTAA	78	79		CCN4	NM_080838.1:850
14	CD36	NM_000072.3	708-807	AGCCAAGGAAAATGTAACCCAGGACGCTGAGGACAACACAGTCTCTTTCCTGCAGCCCAATGGTGCCATCTTCGAACCTTCACTATCAGTTGGAACAGAG	81	81		CD36	NM_000072.3:707
15	CD40LG	NM_000074.2	1226-1325	GCATTTGATTTATCAGTGAAGATGCAGAAGGGAAATGGGGAGCCTCAGCTCACATTCAGTTATGGTTGACTCTGGGTTCCTATGGCCTTGTTGGAGGGGG	80	82		CD40LG	NM_000074.2:1225
16	CD59	NM_000611.4	731-830	GACTTGAACTAGATTGCATGCTTCCTCCTTTGCTCTTGGGAAGACCAGCTTTGCAGTGACAGCTTGAGTGGGTTCTCTGCAGCCCTCAGATTATTTTTCC	81	78		CD59	NM_000611.4:730
17	CDH1	NM_004360.2	536-635	GAATTGCTCACATTTCCCAACTCCTCTCCTGGCCTCAGAAGACAGAAGAGAGACTGGGTTATTCCTCCCATCAGCTGCCCAGAAAATGAAAAAGGCCCAT	80	78		CDH1	NM_004360.2:535
18	COL14A1	NM_021110.1	1866-1965	CTTTAAGTCCACCAAGAAACCTGAGAATCTCCAATGTTGGCTCTAACAGTGCTCGATTAACCTGGGACCCAACTTCAAGACAGATCAATGGTTATCGAAT	80	81		COL14A1	NM_021110.1:1865
19	COL17A1	NM_000494.3	5071-5170	TGACACTTGATGGGGGTGTGTTCTGGTTACTGTTCTAAGGCTGTGCCATCAGCTCCTTCCTCCCCTGTTCATTCTGCATTCTCTAGTCAGTTGGCTAAGA	83	79		COL17A1	NM_000494.3:5070
20	COL1A1	NM_000088.3	5211-5310	CAGAAACATCGGATTTGGGGAACGCGTGTCAATCCCTTGTGCCGCAGGGCTGGGCGGGAGAGACTGTTCTGTTCCTTGTGTAACTGTGTTGCTGAAAGAC	82	81		COL1A1	NM_000088.3:5210
21	COL3A1	NM_000090.3	181-280	TTGGCACAACAGGAAGCTGTTGAAGGAGGATGTTCCCATCTTGGTCAGTCCTATGCGGATAGAGATGTCTGGAAGCCAGAACCATGCCAAATATGTGTCT	81	80		COL3A1	NM_000090.3:180
22	COL4A1	NM_001845.4	781-880	TGGGCTTAAGTTTTCAAGGACCAAAAGGTGACAAGGGTGACCAAGGGGTCAGTGGGCCTCCAGGAGTACCAGGACAAGCTCAAGTTCAAGAAAAAGGAGA	80	82		COL4A1	NM_001845.4:780
23	COL4A3	NM_000091.4	1085-1184	CTGGAAGTGAGGGAGTCAAGGGCAACAGGGGTTTCCCTGGGTTAATGGGTGAAGATGGCATTAAGGGACAGAAAGGGGACATTGGCCCTCCAGGATTTCG	83	84		COL4A3	NM_000091.4:1084
24	COL5A2	NM_000393.3	4076-4175	GGTTCATGCTACCCTGAAGTCACTCAGTAGTCAGATTGAAACCATGCGCAGCCCCGATGGCTCGAAAAAGCACCCAGCCCGCACGTGTGATGACCTAAAG	80	83		COL5A2	NM_000393.3:4075
25	COL5A3	NM_015719.3	5206-5305	TCGAATTCAGCTCTTCTCGAGCGGGATTTCTGCCCCTGTGGGATGTGGCGGCCACTGACTTTGGCCAGACGAACCAAAAGTTTGGGTTTGAACTGGGCCC	83	81		COL5A3	NM_015719.3:5205
26	COL7A1	NM_000094.2	391-490	GCTCTGGGGGTGATGTGATCCGCGCCATCCGTGAGCTTAGCTACAAGGGGGGCAACACTCGCACAGGGGCTGCAATTCTCCATGTGGCTGACCATGTCTT	82	82		COL7A1	NM_000094.2:390
27	CSF2	NM_000758.2	476-575	AGATGAGGCTGGCCAAGCCGGGGAGCTGCTCTCTCATGAAACAAGAGCTAGAAACTCAGGATGGTCATCTTGGAGGGACCAAGGGGTGGGCCACAGCCAT	81	82		CSF2	NM_000758.2:475
28	CSF2RA	NM_006140.3	661-760	AGAAGGAGGGAGATCCGGTGTCCTTATTACATACAAGACTCAGGAACCCATGTGGGATGTCACCTGGATAACCTGTCAGGATTAACGTCTCGCAATTACT	82	79		CSF2RA	NM_006140.3:660
29	CSF3	NM_000759.3	852-951	CCTGCATTTCTGAGTTTCATTCTCCTGCCTGTAGCAGTGAGAAAAAGCTCCTGTCCTCCCATCCCCTGGACTGGGAGGTAGATAGGTAAATACCAAGTAT	79	86		CSF3	NM_000759.3:851
30	CTNNB1	NM_001098210.1	1816-1915	TCTTGCCCTTTGTCCCGCAAATCATGCACCTTTGCGTGAGCAGGGTGCCATTCCACGACTAGTTCAGTTGCTTGTTCGTGCACATCAGGATACCCAGCGC	82	81		CTNNB1	NM_001098210.1:1815
31	CTSG	NM_001911.2	161-260	AGTCCAGCAGGTCAGAGCAGATGTGGAGGGTTCCTGGTGCGAGAAGACTTTGTGCTGACAGCAGCTCATTGCTGGGGAAGCAATATAAATGTCACCCTGG	83	82		CTSG	NM_001911.2:160
32	CTSK	NM_000396.2	416-515	TCTCATTCCCGCAGTAATGACACCCTTTATATCCCAGAATGGGAAGGTAGAGCCCCAGACTCTGTCGACTATCGAAAGAAAGGATATGTTACTCCTGTCA	81	83		CTSK	NM_000396.2:415
33	CTSV	NM_001333.3	2821-2920	GTGAAATTTAATCGAAAGGTGATCCATTGTGAATGCAATGGGAGGGAAGGGGCATGTGGGACTGTGTATCCCAAAAACCCTTTGATAGCCTATGTCCACA	81	83		CTSV	NM_001333.3:2820
34	CXCL1	NM_001511.1	743-842	TATGTTAATATTTCTGAGGAGCCTGCAACATGCCAGCCACTGTGATAGAGGCTGGCGGATCCAAGCAAATGGCCAATGAGATCATTGTGAAGGCAGGGGA	82	83		CXCL1	NM_001511.1:742
35	CXCL11	NM_005409.4	283-382	TTCAAAAGAGGACGCTGTCTTTGCATAGGCCCTGGGGTAAAAGCAGTGAAAGTGGCAGATATTGAGAAAGCCTCCATAATGTACCCAAGTAACAACTGTG	84	83		CXCL11	NM_005409.4:282
36	CXCL2	NM_002089.3	855-954	ATCACATGTCAGCCACTGTGATAGAGGCTGAGGAATCCAAGAAAATGGCCAGTGAGATCAATGTGACGGCAGGGAAATGTATGTGTGTCTATTTTGTAAC	84	78		CXCL2	NM_002089.3:854
37	CXCL5	NM_002994.3	251-350	AGAGAGCTGCGTTGCGTTTGTTTACAGACCACGCAAGGAGTTCATCCCAAAATGATCAGTAATCTGCAAGTGTTCGCCATAGGCCCACAGTGCTCCAAGG	79	80		CXCL5	NM_002994.3:250
38	CXCL8	NM_000584.2	26-125	ACAGCAGAGCACACAAGCTTCTAGGACAAGAGCCAGGAAGAAACCACCGGAAGGAACCATCTCACTGTGTGTAAACATGACTTCCAAGCTGGCCGTGGCT	82	81		CXCL8	NM_000584.2:25
39	DEFB4	NM_004942.2	98-197	TTTTTGGTGGTATAGGCGATCCTGTTACCTGCCTTAAGAGTGGAGCCATATGTCATCCAGTCTTTTGCCCTAGAAGGTATAAACAAATTGGCACCTGTGG	80	80	X	DEFB4A	NM_004942.2:97	also targets DEFB4B (NM_001205266) @ 100%
40	EGF	NM_001963.4	1023-1122	GGAGTGAAGGCTCTGTTGGAGACATCAGAGAAAATAACAGCTGTGTCATTGGATGTGCTTGATAAGCGGCTGTTTTGGATTCAGTACAACAGAGAAGGAA	81	79		EGF	NM_001963.4:1022
41	EGFR	NM_201282.1	1355-1454	ACATCCTGCCGGTGGCATTTAGGGGTGACTCCTTCACACATACTCCTCCTCTGGATCCACAGGAACTGGATATTCTGAAAACCGTAAAGGAAATCACAGG	81	83		EGFR	NM_201282.1:1354
42	EGR1	NM_001964.2	1506-1605	GAGGCATACCAAGATCCACTTGCGGCAGAAGGACAAGAAAGCAGACAAAAGTGTTGTGGCCTCTTCGGCCACCTCCTCTCTCTCTTCCTACCCGTCCCCG	81	82		EGR1	NM_001964.2:1505
43	ENTPD1	NM_001098175.1	796-895	CCCATATGAAACCAATAATCAGGAAACCTTTGGAGCTTTGGACCTTGGGGGAGCCTCTACACAAGTCACTTTTGTACCCCAAAACCAGACTATCGAGTCC	83	83		ENTPD1	NM_001098175.1:795
44	EREG	NM_001432.2	291-390	GAGAGTCCAGTGATAACTGCACAGCTTTAGTTCAGACAGAAGACAATCCACGTGTGGCTCAAGTGTCAATAACAAAGTGTAGCTCTGACATGAATGGCTA	83	82		EREG	NM_001432.2:290
45	F13A1	NM_000129.3	3197-3296	TTCAGGTCCCCTTTCAGAGATATAATAAGCCCAACAAGTTGAAGAAGCTGGCGGATCTAGTGACCAGATATATAGAAGGACTGCAGCCACTGATTCTCTC	80	85		F13A1	NM_000129.3:3196
46	F3	NM_001993.3	1031-1130	GAGCTGGAAGGAGAACTCCCCACTGAATGTTTCATAAAGGAAGCACTGTTGGAGCTACTGCAAATGCTATATTGCACTGTGACCGAGAACTTTTAAGAGG	79	78		F3	NM_001993.3:1030
47	F5	NM_000130.2	5811-5910	GAGACTGTAGGATGCCAATGGGACTAAGCACTGGTATCATATCTGATTCACAGATCAAGGCTTCAGAGTTTCTGGGTTACTGGGAGCCCAGATTAGCAAG	82	81		F5	NM_000130.2:5810
48	FGF10	NM_004465.1	86-185	TGGTGTCTTCCGTCCCTGTCACCTGCCAAGCCCTTGGTCAGGACATGGTGTCACCAGAGGCCACCAACTCTTCTTCCTCCTCCTTCTCCTCTCCTTCCAG	86	84		FGF10	NM_004465.1:85
49	FGF2	NM_002006.4	621-720	GTCCGGGAGAAGAGCGACCCTCACATCAAGCTACAACTTCAAGCAGAAGAGAGAGGAGTTGTGTCTATCAAAGGAGTGTGTGCTAACCGTTACCTGGCTA	82	80		FGF2	NM_002006.4:620
50	FGF7	NM_002009.3	191-290	GAAAGGCTCAAGTTGCACCAGGCAGACAACAGACATGGAATTCTTATATATCCAGCTGTTAGCAACAAAACAAAAGTCAAATAGCAAACAGCGTCACAGC	83	84		FGF7	NM_002009.3:190
51	FLG1	NM_002016.1	11787-11886	TGTACAGTCAGACTCTAGTACCGCTAAGGAACATGGTCACTTTAGTAGTCTTTCACAAGATTCTGCGTATCACTCAGGAATACAGTCACGTGGCAGTCCT	82	80		FLG	NM_002016.1:11786
52	FLG2	NM_001014342.2	791-890	CTGTCATGTGGATTGGAGACTAGTGGGCATGAATCAAACTCTACTCAGTCAAGAATTAGAGAACAAAAGCTTGGGTCTAGCTGTTCAGGTTCAGGAGACA	84	83		FLG2	NM_001014342.2:790
53	FN1	NM_212482.1	1777-1876	GGGAATGGACATGCATTGCCTACTCGCAGCTTCGAGATCAGTGCATTGTTGATGACATCACTTACAATGTGAACGACACATTCCACAAGCGTCATGAAGA	83	81		FN1	NM_212482.1:1776
54	GNAQ	NM_002072.2	1101-1200	AAGGAGTACAATCTGGTCTAATTGTGCCTCCTAGACACCCGCCCTGCCCTTCCCTGGTGGGCTATTGAAGATACACAAGAGGGACTGTATTTCTGTGGAA	83	81		GNAQ	NM_002072.2:1100
55	GUSB	NM_000181.3	1900-1999	CCGATTTCATGACTGAACAGTCACCGACGAGAGTGCTGGGGAATAAAAAGGGGATCTTCACTCGGCAGAGACAACCAAAAAGTGCAGCGTTCCTTTTGCG	84	83	HK	GUSB	NM_000181.3:1899
56	HBEGF	NM_001945.1	476-575	TGAGAGTCACTTTATCCTCCAAGCCACAAGCACTGGCCACACCAAACAAGGAGGAGCACGGGAAAAGAAAGAAGAAAGGCAAGGGGCTAGGGAAGAAGAG	82	82		HBEGF	NM_001945.1:475
57	HGF	NM_000601.4	551-650	TCATTGGTAAAGGACGCAGCTACAAGGGAACAGTATCTATCACTAAGAGTGGCATCAAATGTCAGCCCTGGAGTTCCATGATACCACACGAACACAGCTT	78	82		HGF	NM_000601.4:550
58	HIF1A	NM_001530.2	1986-2085	ATGGATGATGACTTCCAGTTACGTTCCTTCGATCAGTTGTCACCATTAGAAAGCAGTTCCGCAAGCCCTGAAAGCGCAAGTCCTCAAAGCACAGTTACAG	75	79		HIF1A	NM_001530.2:1985
59	HPRT1	NM_000194.1	241-340	TGTGATGAAGGAGATGGGAGGCCATCACATTGTAGCCCTCTGTGTGCTCAAGGGGGGCTATAAATTCTTTGCTGACCTGCTGGATTACATCAAAGCACTG	87	80	HK	HPRT1	NM_000194.1:240
60	IFNG	NM_000619.2	971-1070	ATACTATCCAGTTACTGCCGGTTTGAAAATATGCCTGCAATCTGAGCCAGTGCTTTAATGGCATGTCAGACAGAACTTGAATGTGTCAGGTGACCCTGAT	76	79		IFNG	NM_000619.2:970
61	IGF1	NM_000618.3	492-591	CGTGGATGAGTGCTGCTTCCGGAGCTGTGATCTAAGGAGGCTGGAGATGTATTGCGCACCCCTCAAGCCTGCCAAGTCAGCTCGCTCTGTCCGTGCCCAG	82	83		IGF1	NM_000618.3:491
62	IL10	NM_000572.2	231-330	AAGGATCAGCTGGACAACTTGTTGTTAAAGGAGTCCTTGCTGGAGGACTTTAAGGGTTACCTGGGTTGCCAAGCCTTGTCTGAGATGATCCAGTTTTACC	79	79		IL10	NM_000572.2:230
63	IL1A	NM_000575.3	1086-1185	ACTCCATGAAGGCTGCATGGATCAATCTGTGTCTCTGAGTATCTCTGAAACCTCTAAAACATCCAAGCTTACCTTCAAGGAGAGCATGGTGGTAGTAGCA	78	78		IL1A	NM_000575.3:1085
64	IL1B	NM_000576.2	841-940	GGGACCAAAGGCGGCCAGGATATAACTGACTTCACCATGCAATTTGTGTCTTCCTAAAGAGAGCTGTACCCAGAGAGTCCTGTGCTGAATGTGGACTCAA	81	82		IL1B	NM_000576.2:840
65	IL2	NM_000586.2	301-400	AGGATGCAACTCCTGTCTTGCATTGCACTAAGTCTTGCACTTGTCACAAACAGTGCACCTACTTCAAGTTCTACAAAGAAAACACAGCTACAACTGGAGC	76	77		IL2	NM_000586.2:300
66	IL4	NM_000589.2	626-725	GACACTCGCTGCCTGGGTGCGACTGCACAGCAGTTCCACAGGCACAAGCAGCTGATCCGATTCCTGAAACGGCTCGACAGGAACCTCTGGGGCCTGGCGG	86	82		IL4	NM_000589.2:625
67	IL6	NM_000600.3	365-464	GGCACTGGCAGAAAACAACCTGAACCTTCCAAAGATGGCTGAAAAAGATGGATGCTTCCAATCTGGATTCAATGAGGAGACTTGCCTGGTGAAAATCATC	86	82		IL6	NM_000600.3:364
68	IL6ST	NM_002184.2	2506-2605	CAAAACACTTCGAGCACTGTCCAGTATTCTACCGTGGTACACAGTGGCTACAGACACCAAGTTCCGTCAGTCCAAGTCTTCTCAAGATCCGAGTCTACCC	79	78		IL6ST	NM_002184.2:2505
69	ITGA1	NM_181501.1	1876-1975	AAGTGGCAAGACTATAAGGAAAGAGTATGCACAACGTATTCCATCAGGTGGGGATGGTAAGACACTGAAATTTTTTGGCCAGTCTATCCACGGAGAAATG	83	81		ITGA1	NM_181501.1:1875
70	ITGA2	NM_002203.2	476-575	CAACGGGTGTGTGTTCTGACATCAGTCCTGATTTTCAGCTCTCAGCCAGCTTCTCACCTGCAACTCAGCCCTGCCCTTCCCTCATAGATGTTGTGGTTGT	80	82		ITGA2	NM_002203.2:475
71	ITGA3	NM_002204.2	1117-1216	ACAACTGGAAAGGAAACAGCTACATGATTCAGCGCAAGGAGTGGGACTTATCTGAGTATAGTTACAAGGACCCAGAGGACCAAGGAAACCTCTATATTGG	82	83		ITGA3	NM_002204.2:1116
72	ITGA4	NM_000885.4	976-1075	GCCCACTGCCAACTGGCTCGCCAACGCTTCAGTGATCAATCCCGGGGCGATTTACAGATGCAGGATCGGAAAGAATCCCGGCCAGACGTGCGAACAGCTC	82	81		ITGA4	NM_000885.4:975
73	ITGA5	NM_002205.2	4114-4213	GCCAGCTGCACTGATGCTGCCCCTCATCTCTCTGCCCAACCCTTCCCTCACCTTGGCACCAGACACCCAGGACTTATTTAAACTCTGTTGCAAGTGCAAT	85	82		ITGA5	NM_002205.2:4113
74	ITGA6	NM_000210.1	3066-3165	CTCATGCGAGCCTTCATTGATGTGACTGCTGCTGCCGAAAATATCAGGCTGCCAAATGCAGGCACTCAGGTTCGAGTGACTGTGTTTCCCTCAAAGACTG	81	80		ITGA6	NM_000210.1:3065
75	ITGAV	NM_002210.2	2616-2715	TTTCTTCCGATTCCAAACTGGGAGCACAAGGAGAACCCTGAGACTGAAGAAGATGTTGGGCCAGTTGTTCAGCACATCTATGAGCTGAGAAACAATGGTC	80	80		ITGAV	NM_002210.2:2615
76	ITGB1	NM_002211.3	356-455	TGGGTGGTGCACAAATTCAACATTTTTACAGGAAGGAATGCCTACTTCTGCACGATGTGATGATTTAGAAGCCTTAAAAAAGAAGGGTTGCCCTCCAGAT	79	81		ITGB1	NM_002211.3:355
77	ITGB3	NM_000212.2	4486-4585	GAATAAGCCTTGGAATTAGATATGGGGCAATGACTGAGCCCTGTCTCACCCATGGATTACTCCTTACTGTAGGGAATGGCAGTATGGTAGAGGGATAAAT	82	79		ITGB3	NM_000212.2:4485
78	ITGB5	NM_002213.3	2561-2660	CAAAGTTTCAGAGCGAGCGATCCAGGGCCCGCTATGAAATGGCTTCAAATCCATTATACAGAAAGCCTATCTCCACGCACACTGTGGACTTCACCTTCAA	84	82		ITGB5	NM_002213.3:2560
79	ITGB6	NM_000888.3	1091-1190	AACATTCTCCAGCTGATCATCTCAGCTTATGAAGAACTGCGGTCTGAGGTGGAACTGGAAGTATTAGGAGACACTGAAGGACTCAACTTGTCATTTACAG	83	83		ITGB6	NM_000888.3:1090
80	IVL	NM_005547.2	1861-1960	CTGGCTCCACTTATTTCGGGTCCGCTAGGTGGCCCGTCTCATCTGTGAACTTGACTCTGTCCCTCTACATGTCTCTTTAATGGGGTGAGGGTGGGGGAGA	83	82		IVL	NM_005547.2:1860
81	KLK8	NM_144507.1	345-444	CTATACCAACATCTGCCGCTACCTGGACTGGATCAAGAAGATCATAGGCAGCAAGGGCTGATTCTAGGATAAGCACTAGATCTCCCTTAATAAACTCACA	86	83		KLK8	NM_144507.1:344
82	KRT10	NM_000421.3	895-994	AAATGAAAGACCTTCGAAATGTGTCCACTGGTGATGTGAATGTGGAAATGAATGCTGCCCCGGGTGTTGATCTGACTCAACTTCTGAATAACATGAGAAG	81	84		KRT10	NM_000421.3:894
83	KRT6A	NM_005554.3	992-1091	AGCAGCAGAGAATGAATTTGTGACTCTGAAGAAGGATGTGGATGCTGCCTACATGAACAAGGTTGAACTGCAAGCCAAGGCAGACACTCTCACAGACGAG	85	86	X	KRT6A	NM_005554.3:991	also targets KRT6B (NM_005555) @ 98% and KRT6C (NM_173086) @ 99%
84	LAMA3	NM_000227.3	4261-4360	CAGAGGACTGGTGTTTCACACGGGCACTAAGAACTCCTTTATGGCTCTTTATCTTTCAAAAGGACGTCTGGTCTTTGCACTGGGGACAGATGGGAAAAAA	82	83		LAMA3	NM_000227.3:4260	sub-maximal isoform coverage due to non-overlapping transcript variants
85	LDHA	NM_001165414.1	1691-1790	AACTTCCTGGCTCCTTCACTGAACATGCCTAGTCCAACATTTTTTCCCAGTGAGTCACATCCTGGGATCCAGTGTATAAATCCAATATCATGTCTTGTGC	78	79	HK	LDHA	NM_001165414.1:1690
86	MAPK1	NM_138957.2	431-530	ACTGCCAGAGAACCCTGAGGGAGATAAAAATCTTACTGCGCTTCAGACATGAGAACATCATTGGAATCAATGACATTATTCGAGCACCAACCATCGAGCA	83	80		MAPK1	NM_138957.2:430
87	MAPK3	NM_001040056.1	581-680	AACGTGCTCCACCGAGATCTAAAGCCCTCCAACCTGCTCATCAACACCACCTGCGACCTTAAGATTTGTGATTTCGGCCTGGCCCGGATTGCCGATCCTG	82	81		MAPK3	NM_001040056.1:580
88	MIF	NM_002415.1	320-419	TCCTACAGCAAGCTGCTGTGCGGCCTGCTGGCCGAGCGCCTGCGCATCAGCCCGGACAGGGTCTACATCAACTATTACGACATGAACGCGGCCAATGTGG	90	87		MIF	NM_002415.1:319
89	MKI67	NM_002417.2	4021-4120	AGCAGATGTAGAGGGAGAACTCTTAGCGTGCAGGAATCTAATGCCATCAGCAGGCAAAGCCATGCACACGCCTAAACCATCAGTAGGTGAAGAGAAAGAC	81	82		MKI67	NM_002417.2:4020
90	MMP1	NM_002421.3	1118-1217	AAATGGGCTTGAAGCTGCTTACGAATTTGCCGACAGAGATGAAGTCCGGTTTTTCAAAGGGAATAAGTACTGGGCTGTTCAGGGACAGAATGTGCTACAC	84	84		MMP1	NM_002421.3:1117
91	MMP10	NM_002425.1	89-188	GCAGCAAAAGAGGAGGACTCCAACAAGGATCTTGCCCAGCAATACCTAGAAAAGTACTACAACCTCGAAAAGGATGTGAAACAGTTTAGAAGAAAGGACA	86	82		MMP10	NM_002425.1:88
92	MMP12	NM_002426.3	770-869	ATGTTGACATCAACACATTTCGCCTCTCTGCTGATGACATACGTGGCATTCAGTCCCTGTATGGAGACCCAAAAGAGAACCAACGCTTGCCAAATCCTGA	78	79		MMP12	NM_002426.3:769
93	MMP13	NM_002427.2	952-1051	CTGGCGCCTGCATCCTCAGCAGGTTGATGCGGAGCTGTTTTTAACGAAATCATTTTGGCCAGAACTTCCCAACCGTATTGATGCTGCATATGAGCACCCT	82	81		MMP13	NM_002427.2:951
94	MMP14	NM_004995.2	1471-1570	GACAAGATTGATGCTGCTCTCTTCTGGATGCCCAATGGAAAGACCTACTTCTTCCGTGGAAACAAGTACTACCGTTTCAACGAAGAGCTCAGGGCAGTGG	80	79		MMP14	NM_004995.2:1470
95	MMP2	NM_004530.2	2361-2460	CCCGGAGGGGCCTGGCAGCCGTGCCTTCAGCTCTACAGCTAATCAGCATTCTCACTCCTACCTGGTAATTTAAGATTCCAGAGAGTGGCTCCTCCCGGTG	82	81		MMP2	NM_004530.2:2360
96	MMP28	NM_001032278.1	413-512	AAAGCTCCCACCTCCACTCGATTCAGCGATGCCATCAGAGCGTTTCAGTGGGTGTCCCAGCTACCTGTCAGCGGCGTGTTGGACCGCGCCACCCTGCGCC	83	86		MMP28	NM_001032278.1:412
97	MMP3	NM_002422.3	26-125	AGGCATAGAGACAACATAGAGCTAAGTAAAGCCAGTGGAAATGAAGAGTCTTCCAATCCTACTGTTGCTGTGCGTGGCAGTTTGCTCAGCCTATCCATTG	79	78		MMP3	NM_002422.3:25
98	MMP7	NM_002423.3	312-411	GTGCCAGATGTTGCAGAATACTCACTATTTCCAAATAGCCCAAAATGGACTTCCAAAGTGGTCACCTACAGGATCGTATCATATACTCGAGACTTACCGC	81	81		MMP7	NM_002423.3:311
99	MMP8	NM_002424.2	2591-2690	CTCTCTCCTAGAGTCCAAACCCAAATGGGCCAGTTGGATCTGATGTTCGTCAGTTCTTTACTTCTATTTCCTGGGGTACTCAGGAGGGCACACACTATAG	78	80		MMP8	NM_002424.2:2590
100	MMP9	NM_004994.2	1531-1630	CACTACTGTGCCTTTGAGTCCGGTGGACGATGCCTGCAACGTGAACATCTTCGACGCCATCGCGGAGATTGGGAACCAGCTGTATTTGTTCAAGGATGGG	82	82		MMP9	NM_004994.2:1530
101	MT1A	NM_005946.2	1-100	ACCAAGCCTTCCACGTGCGCCTTATAGCCTCTCAACTTCTTGCTTGGGATCTCCAACCTCACCGCGGCTCGAAATGGACCCCAACTGCTCCTGCGCCACT	83	87		MT1A	NM_005946.2:0
102	MT2A	NM_005953.3	226-325	CAGGGCTGCATCTGCAAAGGGGCGTCGGACAAGTGCAGCTGCTGCGCCTGATGCTGGGACAGCCCCGCTCCCAGATGTAAAGAACGCGACTTCCACAAAC	85	85		MT2A	NM_005953.3:225
103	MYC	NM_002467.3	1611-1710	TCGGACACCGAGGAGAATGTCAAGAGGCGAACACACAACGTCTTGGAGCGCCAGAGGAGGAACGAGCTAAAACGGAGCTTTTTTGCCCTGCGTGACCAGA	82	82		MYC	NM_002467.3:1610
104	NF1	NM_000267.2	1036-1135	TACCAGATCCCACAGACTGATATGGCTGAATGTGCAGAAAAGCTATTTGACTTGGTGGATGGTTTTGCTGAAAGCACCAAACGTAAAGCAGCAGTTTGGC	83	82		NF1	NM_000267.2:1035
105	NGF	NM_002506.2	635-734	GAGGTGATGGTGTTGGGAGAGGTGAACATTAACAACAGTGTATTCAAACAGTACTTTTTTGAGACCAAGTGCCGGGACCCAAATCCCGTTGACAGCGGGT	82	83		NGF	NM_002506.2:634
106	PDGFA	NM_002607.5	2461-2560	CGTTTGTGGCTGAGTGACAACTTGTTCCCCGCAGTGCACACCTAGAATGCTGTGTTCCCACGCGGCACGTGAGATGCATTGCCGCTTCTGTCTGTGTTGT	82	82		PDGFA	NM_002607.5:2460
107	PF4	NM_002619.2	1-100	CCATCGCACTGAGCACTGAGATCCTGCTGGAAGCTCTGCCGCAGCATGAGCTCCGCAGCCGGGTTCTGCGCCTCACGCCCCGGGCTGCTGTTCCTGGGGT	89	90		PF4	NM_002619.2:0
108	PI3	NM_002638.3	275-374	CCATGTTGAATCCCCCTAACCGCTGCTTGAAAGATACTGACTGCCCAGGAATCAAGAAGTGCTGTGAAGGCTCTTGCGGGATGGCCTGTTTCGTTCCCCA	83	81		PI3	NM_002638.3:274
109	PI3K	NM_006218.2	2446-2545	CCTCAGGCTTGAAGAGTGTCGAATTATGTCCTCTGCAAAAAGGCCACTGTGGTTGAATTGGGAGAACCCAGACATCATGTCAGAGTTACTGTTTCAGAAC	76	77		PIK3CA	NM_006218.2:2445
110	PLAT	NM_000931.2	1335-1434	CAAGGTTACCAACTACCTAGACTGGATTCGTGACAACATGCGACCGTGACCAGGAACACCCGACTCCTCAAAAGCAAATGAGATCCCGCCTCTTCTTCTT	84	84		PLAT	NM_000931.2:1334
111	PLAU	NM_002658.2	794-893	TTCATTGATTACCCAAAGAAGGAGGACTACATCGTCTACCTGGGTCGCTCAAGGCTTAACTCCAACACGCAAGGGGAGATGAAGTTTGAGGTGGAAAACC	80	79		PLAU	NM_002658.2:793
112	PLAUR	NM_001005376.2	539-638	CGGGCTGTCACCTATTCCCGAAGCCGTTACCTCGAATGCATTTCCTGTGGCTCATCAGACATGAGCTGTGAGAGGGGCCGGCACCAGAGCCTGCAGTGCC	82	92		PLAUR	NM_001005376.2:538
113	POLR1B	NM_019014.3	3321-3420	GGAGAACTCGGCCTTAGAATACTTTGGTGAGATGTTAAAGGCTGCTGGCTACAATTTCTATGGCACCGAGAGGTTATATAGTGGCATCAGTGGGCTAGAA	81	80		POLR1B	NM_019014.3:3320
114	PTEN	NM_000314.3	1676-1775	TGTGGTCTGCCAGCTAAAGGTGAAGATATATTCCTCCAATTCAGGACCCACACGACGGGAAGACAAGTTCATGTACTTTGAGTTCCCTCAGCCGTTACCT	79	78	HK;X	PTEN	NM_000314.3:1675	also targets PTENP1 (NR_023917) @ 96%
115	PTGS2	NM_000963.1	496-595	GCTACAAAAGCTGGGAAGCCTTCTCTAACCTCTCCTATTATACTAGAGCCCTTCCTCCTGTGCCTGATGATTGCCCGACTCCCTTGGGTGTCAAAGGTAA	79	81		PTGS2	NM_000963.1:495
116	RAC1	NM_006908.4	501-600	CTGCATCATTTGAAAATGTCCGTGCAAAGTGGTATCCTGAGGTGCGGCACCACTGTCCCAACACTCCCATCATCCTAGTGGGAACTAAACTTGATCTTAG	83	82		RAC1	NM_006908.4:500
117	RHOA	NM_001664.2	1231-1330	GGTACTCTGGTGAGTCACCACTTCAGGGCTTTACTCCGTAACAGATTTTGTTGGCATAGCTCTGGGGTGGGCAGTTTTTTGAAAATGGGCTCAACCAGAA	79	84		RHOA	NM_001664.2:1230
118	RPLP0	NM_001002.3	251-350	CGAAATGTTTCATTGTGGGAGCAGACAATGTGGGCTCCAAGCAGATGCAGCAGATCCGCATGTCCCTTCGCGGGAAGGCTGTGGTGCTGATGGGCAAGAA	80	82	HK;X	RPLP0	NM_001002.3:250	also targets pseudogene RPLP0P2 (NR_002775) @ 92%
119	S100A7	NM_002963.3	23-122	CATCCTTCTACTCGTGACGCTTCCCAGCTCTGGCTTTTTGAAAGCAAAGATGAGCAACACTCAAGCTGAGAGGTCCATAATAGGCATGATCGACATGTTT	79	83	X	S100A7	NM_002963.3:22	also targets S100A7A (NM_176823) @ 98%
120	S100A8	NM_002964.3	116-215	CTGATAAAGGGGAATTTCCATGCCGTCTACAGGGATGACCTGAAGAAATTGCTAGAGACCGAGTGTCCTCAGTATATCAGGAAAAAGGGTGCAGACGTCT	76	82		S100A8	NM_002964.3:115
121	S100A9	NM_002965.2	76-175	AACATAGAGACCATCATCAACACCTTCCACCAATACTCTGTGAAGCTGGGGCACCCAGACACCCTGAACCAGGGGGAATTCAAAGAGCTGGTGCGAAAAG	81	82		S100A9	NM_002965.2:75
122	SERPINB3	NM_006919.2	1-100	AAATACTAACCACAGAGGGAGAGGCAGCAAGAGGAGAGGCATAAATTCAGGATCTCACCCTTCATTCCACAGACACACATAGCCTCTCTGCCCACCTCTG	88	87	X	SERPINB3	NM_006919.2:0	also targets SERPINB4 (NM_002974, NM_175041) @ 97% across 93 bp
123	SERPINE1	NM_000602.2	2471-2570	TGTGTTCAATAGATTTAGGAGCAGAAATGCAAGGGGCTGCATGACCTACCAGGACAGAACTTTCCCCAATTACAGGGTGACTCACAGCCGCATTGGTGAC	81	81		SERPINE1	NM_000602.2:2470
124	SLC30A1	NM_021194.2	1376-1475	GGAATTCACGCTACTACCATTCAGCCTGAATTTGCTAGTGTAGGCTCTAAATCAAGTGTAGTTCCGTGTGAACTTGCCTGCAGAACCCAGTGTGCTTTGA	80	81		SLC30A1	NM_021194.2:1375
125	SLC39A2	NM_014579.1	1011-1110	GGAGCTGTGTAGCCGCTGGTTTTGCCTTCATGGCCTTTATTGCCTTGTGGGCCTGAGAGATTCCTGGCTTTTCTGATGGACCTATTTAGGACAACCTCTC	80	81		SLC39A2	NM_014579.1:1010
126	SLC39A4	NM_017767.2	1832-1931	GCCACCTCGCTGGCCGTGTTCTGCCACGAGTTGCCACACGAGCTGGGGGACTTCGCCGCCTTGCTGCACGCGGGGCTGTCCGTGCGCCAAGCACTGCTGC	86	85		SLC39A4	NM_017767.2:1831
127	CuZnSOD	NM_000454.4	36-135	GCCTATAAAGTAGTCGCGGAGACGGGGTGCTGGTTTGCGTCGTAGTCTCCTGCAGCGTCTGGGGTTTCCGTTGCAGTCCTCGGAACCAGGACCTCGGCGT	83	82		SOD1	NM_000454.4:35
128	STAT3	NM_003150.3	2061-2160	AAAGAAGGAGGCGTCACTTTCACTTGGGTGGAGAAGGACATCAGCGGTAAGACCCAGATCCAGTCCGTGGAACCATACACAAAGCAGCAGCTGAACAACA	81	82		STAT3	NM_003150.3:2060
129	TFPI	NM_001032281.2	739-838	ACAGTGTGAACGTTTCAAGTATGGTGGATGCCTGGGCAATATGAACAATTTTGAGACACTGGAAGAATGCAAGAACATTTGTGAAGATGGTCCGAATGGT	81	83		TFPI	NM_001032281.2:738
130	TGFA	NM_003236.2	781-880	TGCCACAGACCTTCCTACTTGGCCTGTAATCACCTGTGCAGCCTTTTGTGGGCCTTCAAAACTCTGTCAAGAACTCCGTCTGCTTGGGGTTATTCAGTGT	84	81		TGFA	NM_003236.2:780
131	TGFB1	NM_000660.3	1261-1360	TATATGTTCTTCAACACATCAGAGCTCCGAGAAGCGGTACCTGAACCCGTGTTGCTCTCCCGGGCAGAGCTGCGTCTGCTGAGGCTCAAGTTAAAAGTGG	79	82		TGFB1	NM_000660.3:1260
132	TGFB2	NM_003238.2	1126-1225	AAGCCAGAGTGCCTGAACAACGGATTGAGCTATATCAGATTCTCAAGTCCAAAGATTTAACATCTCCAACCCAGCGCTACATCGACAGCAAAGTTGTGAA	82	81		TGFB2	NM_003238.2:1125
133	TGFBR3	NM_003243.3	1951-2050	CTTTGTTTTGGAGTCTCCTCTGAATGGCTGCGGTACTCGGCCCCGGTGGTCAGCCCTTGATGGTGTGGTCTACTATAACTCCATTGTGATACAGGTTCCA	82	79		TGFBR3	NM_003243.3:1950
134	THBD	NM_000361.2	1247-1346	GTGGAGCCCGTGGACCCGTGCTTCAGAGCCAACTGCGAGTACCAGTGCCAGCCCCTGAACCAAACTAGCTACCTCTGCGTCTGCGCCGAGGGCTTCGCGC	82	81		THBD	NM_000361.2:1246
135	TIMP-1	NM_003254.2	330-429	CGTGGGGACACCAGAAGTCAACCAGACCACCTTATACCAGCGTTATGAGATCAAGATGACCAAGATGTATAAAGGGTTCCAAGCCTTAGGGGATGCCGCT	81	81		TIMP1	NM_003254.2:329
136	TIMP-2	NM_003255.4	1556-1655	GAAGGAGCCCCATCAATCCTATTAATCCTCAGAATTCCAGTGGGAGCCTCCCTCTGAGCCTTGTAGAAATGGGAGCGAGAAACCCCAGCTGAGCTGCGTT	80	82		TIMP2	NM_003255.4:1555
137	TIMP-3	NM_000362.4	1641-1740	ACCTGCCTTGCTTTGTGACTTCCAAGAACGAGTGTCTCTGGACCGACATGCTCTCCAATTTCGGTTACCCTGGCTACCAGTCCAAACACTACGCCTGCAT	82	80		TIMP3	NM_000362.4:1640
138	TLR4	NM_138554.2	2571-2670	ACTCAGAAAAGCCCTGCTGGATGGTAAATCATGGAATCCAGAAGGAACAGTGGGTACAGGATGCAATTGGCAGGAAGCAACATCTATCTGAAGAGGAAAA	79	79		TLR4	NM_138554.2:2570
139	TMPRSS6	NM_153609.2	2930-3029	AGCCTTGCCTCCAGAGAGCAGATTCCAGCTTCGGAAGCCCCTGGTCTAACTTGGGATCTGGGAATGGAAGGTGCTCCCATCGGAGGGGACCCTCAGAGCC	85	85		TMPRSS6	NM_153609.2:2929
140	TNF	NM_000594.2	1011-1110	AGCAACAAGACCACCACTTCGAAACCTGGGATTCAGGAATGTGTGGCCTGCACAGTGAAGTGCTGGCAACCACTAAGAATTCAAACTGGGGCCTCCAGAA	83	81		TNF	NM_000594.2:1010
141	VEGFA	NM_001025366.1	1326-1425	GAGTCCAACATCACCATGCAGATTATGCGGATCAAACCTCACCAAGGCCAGCACATAGGAGAGATGAGCTTCCTACAGCACAACAAATGTGAATGCAGAC	82	82		VEGFA	NM_001025366.1:1325
142	VTN	NM_000638.3	1347-1446	ACGTGGCTGTCCTTGTTCTCCAGTGAGGAGAGCAACTTGGGAGCCAACAACTATGATGACTACAGGATGGACTGGCTTGTGCCTGCCACCTGTGAACCCA	83	83		VTN	NM_000638.3:1346
143	VWF	NM_000552.3	8116-8215	CACCTGCAACCCCTGCCCCCTGGGTTACAAGGAAGAAAATAACACAGGTGAATGTTGTGGGAGATGTTTGCCTACGGCTTGCACCATTCAGCTAAGAGGA	83	81		VWF	NM_000552.3:8115
144	WAS	NM_000377.2	91-190	GGCCGAGGAGCACCAGCGGTTCAGCAGAACATACCCTCCACCCTCCTCCAGGACCACGAGAACCAGCGACTCTTTGAGATGCTTGGACGAAAATGCTTGA	83	81		WAS	NM_000377.2:90
145	WNT5A	NM_003392.3	476-575	ACCCTGTTCAGATGTCAGAAGTATATATTATAGGAGCACAGCCTCTCTGCAGCCAACTGGCAGGACTTTCTCAAGGACAGAAGAAACTGTGCCACTTGTA	81	82		WNT5A	NM_003392.3:475

## Sheet: Isoform Coverage
nCounter™ CodeSet Design Report - Isoform Coverage
						RefSeq Version:	2019-03-01
ISOFORM COVERAGE
Customer Name	HUGO Gene	Probe NSID	Tot Isoforms	Isoforms Hit By Probe	# Hit	Isoforms Not Hit By Probe	# Not Hit
ABCF1	ABCF1	NM_001090.2:850	2	NM_001090.2;NM_001025091.2	2		0
ACTC1	ACTC1	NM_005159.4:2005	1	NM_005159.4	1		0
ACVRL1	ACVRL1	NM_000020.1:1710	5	XM_005269235.2;XM_011539008.1;NM_000020.2;XM_024449279.1;NM_001077401.1	5		0
ADAM17	ADAM17	NM_003183.4:1595	6	NM_003183.6;XM_017004785.2;XM_017004786.2;XM_011510376.3;XM_024453056.1;XM_011510375.3	6		0
ADORA2A	ADORA2A	NM_000675.3:1095	7	NM_000675.6;NM_001278500.1;NR_103543.1;NM_001278497.1;NM_001278499.1;NM_001278498.1;NR_103544.1	7		0
RAGE	AGER	NM_001136.3:340	13	NM_001206934.1;NM_001136.5;NR_038190.1;XR_001743189.2;NM_001206966.1;NM_001206954.1;NM_001206940.1;NM_001206932.1;XR_001743190.2;NM_001206929.1;NM_172197.2;NM_001206936.1;XM_017010328.2	13		0
ANGPT1	ANGPT1	NM_001146.3:2080	4	XR_928319.2;NM_001146.5;NM_001314051.1;NM_001199859.2	4		0
BMP1	BMP1	NM_001199.1:1305	9	NM_006129.5;XR_949458.2;NR_033404.1;XM_017013738.2;NR_033403.1;XM_006716386.3;XM_011544617.2;NM_001199.3;XR_001745579.2	9		0
CCL2	CCL2	NM_002982.3:123	1	NM_002982.4	1		0
CCL7	CCL7	NM_006273.2:120	1	NM_006273.3	1		0
CYR61	CCN1	NM_001554.3:1390	1	NM_001554.5	1		0
CTGF	CCN2	NM_001901.2:1100	1	NM_001901.3	1		0
WISP1	CCN4	NM_080838.1:850	5	NM_001204870.1;NM_003882.4;NR_037944.1;NM_080838.2;NM_001204869.1	5		0
CD36	CD36	NM_000072.3:707	14	NR_110501.1;NM_001289908.1;XM_005250714.1;XM_024447003.1;NM_001127443.1;XM_005250713.1;XM_024447002.1;NM_001127444.1;NM_001289909.1;NM_001289911.1;XM_005250715.5;NM_001001548.2;NM_000072.3;NM_001001547.2	14		0
CD40LG	CD40LG	NM_000074.2:1225	1	NM_000074.2	1		0
CD59	CD59	NM_000611.4:730	8	NM_203330.2;NM_001127227.1;NM_001127225.1;NM_001127223.1;NM_203331.2;NM_000611.5;NM_001127226.1;NM_203329.2	8		0
CDH1	CDH1	NM_004360.2:535	4	NM_001317184.1;NM_004360.5;NM_001317185.1;NM_001317186.1	4		0
COL14A1	COL14A1	NM_021110.1:1865	4	NM_021110.4;XM_005251059.4;XM_006716651.3;XM_017013809.2	4		0
COL17A1	COL17A1	NM_000494.3:5070	1	NM_000494.4	1		0
COL1A1	COL1A1	NM_000088.3:5210	4	XM_005257059.4;XM_005257058.4;NM_000088.3;XM_011524341.1	4		0
COL3A1	COL3A1	NM_000090.3:180	1	NM_000090.3	1		0
COL4A1	COL4A1	NM_001845.4:780	3	NM_001303110.1;NM_001845.6;XM_011521048.2	3		0
COL4A3	COL4A3	NM_000091.4:1084	9	XM_005246277.3;XR_001738601.1;XM_011510555.1;NM_000091.4;XR_241280.3;XM_005246280.3;XM_011510556.2;XM_006712245.3;XM_017003295.1	9		0
COL5A2	COL5A2	NM_000393.3:4075	2	XM_011510573.3;NM_000393.5	2		0
COL5A3	COL5A3	NM_015719.3:5205	3	XM_017026849.2;NM_015719.4;XM_011528042.2	3		0
COL7A1	COL7A1	NM_000094.2:390	14	XM_017005691.1;XR_001740007.1;XR_001740006.1;XM_017005689.1;XM_017005692.1;NM_000094.3;XM_017005688.1;XR_001740003.1;XM_011533337.1;XR_001740005.1;XM_017005690.1;XR_001740004.1;XR_001740008.1;XR_001740009.1	14		0
CSF2	CSF2	NM_000758.2:475	1	NM_000758.4	1		0
CSF2RA	CSF2RA	NM_006140.3:660	32	XM_011546165.3;NM_001161529.1;XM_011546170.3;NM_172249.2;XM_011546169.1;NM_001161530.1;NM_006140.4;NM_172245.2;NM_172246.2;XM_011546175.2;XM_011545619.1;XM_011546168.2;XM_017030029.1;XM_011545622.1;XM_011545627.3;NM_001161532.1;XM_011545618.3;NM_172247.2;XM_011546166.1;XM_011546173.1;XM_011545620.2;XM_017029288.1;XM_017030028.1;XM_011545621.2;XM_011546174.3;NR_027760.1;XM_011545626.1;XM_017029287…	32		0
CSF3	CSF3	NM_000759.3:851	5	NR_033662.1;NM_001178147.1;NM_172220.2;NM_000759.3;NM_172219.2	5		0
CTNNB1	CTNNB1	NM_001098210.1:1815	12	XM_006712985.1;XM_024453358.1;NM_001098209.1;XM_024453356.1;XM_024453357.1;XM_024453360.1;XM_006712983.2;XM_017005738.1;NM_001098210.1;NM_001330729.1;XM_024453359.1;NM_001904.4	12		0
CTSG	CTSG	NM_001911.2:160	2	XM_011536499.1;NM_001911.3	2		0
CTSK	CTSK	NM_000396.2:415	1	NM_000396.4	1		0
CTSV	CTSV	NM_001333.3:2820	2	NM_001201575.1;NM_001333.4	2		0
CXCL1	CXCL1	NM_001511.1:742	2	NR_046035.1;NM_001511.3	2		0
CXCL11	CXCL11	NM_005409.4:282	2	NM_005409.4;NM_001302123.1	2		0
CXCL2	CXCL2	NM_002089.3:854	1	NM_002089.4	1		0
CXCL5	CXCL5	NM_002994.3:250	1	NM_002994.5	1		0
CXCL8	CXCL8	NM_000584.2:25	2	NM_000584.4;NM_001354840.1	2		0
DEFB4	DEFB4A	NM_004942.2:97	1	NM_004942.3	1		0
EGF	EGF	NM_001963.4:1022	18	XR_001741156.1;XM_017007848.1;XM_017007849.1;NM_001178131.2;XM_017007853.1;XM_017007845.1;XM_017007846.1;XM_005262796.2;NM_001178130.2;XM_017007855.1;NM_001963.5;XM_017007854.1;XM_017007847.1;XM_011531707.1;XM_017007851.1;XR_001741157.1;NM_001357021.1;XM_017007850.1	18		0
EGFR	EGFR	NM_201282.1:1354	9	NM_201284.1;NM_001346941.1;NM_201282.1;NM_001346899.1;NM_001346900.1;NM_201283.1;NM_001346897.1;NM_001346898.1;NM_005228.5	9		0
EGR1	EGR1	NM_001964.2:1505	1	NM_001964.3	1		0
ENTPD1	ENTPD1	NM_001098175.1:795	23	XM_011540377.2;NM_001164179.1;NM_001164181.1;XM_011540374.3;XM_017016961.1;NM_001164182.1;NM_001312654.1;NM_001776.6;NM_001098175.1;XM_017016960.1;XM_017016963.1;NM_001320916.1;XM_017016962.1;XM_011540370.2;XM_017016959.1;XM_011540376.2;XM_017016964.2;NM_001164178.1;XM_017016958.2;XM_011540371.2;NM_001164183.1;XM_011540372.2;XM_011540373.2	23		0
EREG	EREG	NM_001432.2:290	1	NM_001432.3	1		0
F13A1	F13A1	NM_000129.3:3196	1	NM_000129.3	1		0
F3	F3	NM_001993.3:1030	2	NM_001993.5;NM_001178096.1	2		0
F5	F5	NM_000130.2:5810	2	XM_017000660.2;NM_000130.4	2		0
FGF10	FGF10	NM_004465.1:85	2	XM_005248264.4;NM_004465.1	2		0
FGF2	FGF2	NM_002006.4:620	2	NM_001361665.1;NM_002006.5	2		0
FGF7	FGF7	NM_002009.3:190	1	NM_002009.4	1		0
FLG1	FLG	NM_002016.1:11786	1	NM_002016.1	1		0
FLG2	FLG2	NM_001014342.2:790	2	NM_001014342.2;XM_011509531.2	2		0
FN1	FN1	NM_212482.1:1776	34	NM_001306129.1;XM_005246416.1;XM_005246404.1;NM_001365518.1;NM_001306132.1;XM_017003695.1;NM_212478.2;XM_005246410.1;XM_005246403.1;XM_017003692.1;NM_001306131.1;NM_001365517.1;XM_005246399.1;NM_054034.2;XM_005246408.1;NM_002026.3;XM_005246407.1;NM_001365524.1;XM_005246402.1;NM_212476.2;NM_001365521.1;NM_001306130.1;XM_005246398.1;NM_001365519.1;NM_001365522.1;NM_001365523.1;NM_212474.2;XM_005246…	34		0
GNAQ	GNAQ	NM_002072.2:1100	2	XM_017014628.2;NM_002072.4	2		0
GUSB	GUSB	NM_000181.3:1899	16	XR_001744661.2;XM_005250297.4;NM_001284290.1;XM_017012092.1;XM_017012093.2;NM_001293105.1;XR_001744658.2;XM_011516113.1;XR_927461.3;XR_001744659.2;XM_017012091.1;XM_011516114.2;NM_001293104.1;NM_000181.4;XR_001744660.2;NR_120531.1	16		0
HBEGF	HBEGF	NM_001945.1:475	1	NM_001945.3	1		0
HGF	HGF	NM_000601.4:550	9	NM_001010934.2;XM_006715956.2;XM_017012097.1;NM_001010932.2;NM_000601.6;NM_001010931.2;XM_011516115.2;NM_001010933.2;XM_017012098.1	9		0
HIF1A	HIF1A	NM_001530.2:1985	3	NM_181054.2;NM_001243084.1;NM_001530.4	3		0
HPRT1	HPRT1	NM_000194.1:240	1	NM_000194.3	1		0
IFNG	IFNG	NM_000619.2:970	1	NM_000619.3	1		0
IGF1	IGF1	NM_000618.3:491	8	XM_017019263.2;XM_017019261.1;NM_001111284.1;XM_017019262.2;NM_000618.4;NM_001111283.2;NM_001111285.2;XM_017019259.1	8		0
IL10	IL10	NM_000572.2:230	1	NM_000572.3	1		0
IL1A	IL1A	NM_000575.3:1085	1	NM_000575.4	1		0
IL1B	IL1B	NM_000576.2:840	2	XM_017003988.2;NM_000576.2	2		0
IL2	IL2	NM_000586.2:300	2	XM_017008177.1;NM_000586.3	2		0
IL4	IL4	NM_000589.2:625	3	NM_000589.4;NM_001354990.1;NM_172348.2	3		0
IL6	IL6	NM_000600.3:364	4	XM_005249745.5;XM_011515390.2;NM_001318095.1;NM_000600.5	4		0
IL6ST	IL6ST	NM_002184.2:2505	10	NM_001364276.1;NM_002184.4;NM_175767.2;NM_001364278.1;NM_001190981.1;NR_120480.1;NM_001364279.1;NM_001364275.1;NM_001364277.1;NR_157112.1	10		0
ITGA1	ITGA1	NM_181501.1:1875	1	NM_181501.1	1		0
ITGA2	ITGA2	NM_002203.2:475	6	NM_002203.4;NR_073104.1;NR_073105.1;NR_073103.1;NR_073107.1;NR_073106.1	6		0
ITGA3	ITGA3	NM_002204.2:1116	3	XR_001752507.1;XM_005257308.2;NM_002204.4	3		0
ITGA4	ITGA4	NM_000885.4:975	2	NM_001316312.1;NM_000885.6	2		0
ITGA5	ITGA5	NM_002205.2:4113	2	XM_024448970.1;NM_002205.5	2		0
ITGA6	ITGA6	NM_000210.1:3065	9	XM_017004007.1;XM_017004008.1;NM_001079818.3;NM_000210.3;NM_001365530.1;NM_001316306.1;XM_017004005.1;XM_017004006.1;NM_001365529.1	9		0
ITGAV	ITGAV	NM_002210.2:2615	3	NM_001144999.2;NM_001145000.2;NM_002210.5	3		0
ITGB1	ITGB1	NM_002211.3:355	3	NM_033668.2;NM_133376.2;NM_002211.4	3		0
ITGB3	ITGB3	NM_000212.2:4485	1	NM_000212.2	1		0
ITGB5	ITGB5	NM_002213.3:2560	9	XM_006713630.3;NM_001354765.1;NM_001354764.1;XM_017006355.1;XM_017006354.2;XM_017006353.1;NM_002213.5;NM_001354766.1;XM_005247436.3	9		0
ITGB6	ITGB6	NM_000888.3:1090	7	NM_000888.5;NM_001282389.1;NM_001282353.1;NM_001282390.1;NM_001282388.1;NM_001282354.1;NM_001282355.1	7		0
IVL	IVL	NM_005547.2:1860	1	NM_005547.3	1		0
KLK8	KLK8	NM_144507.1:344	6	NM_001281431.1;NR_104008.1;NM_144505.2;NM_144507.2;NM_007196.3;NM_144506.2	6		0
KRT10	KRT10	NM_000421.3:894	2	NM_000421.4;XM_005257343.3	2		0
KRT6A	KRT6A	NM_005554.3:991	1	NM_005554.4	1		0
LAMA3	LAMA3	NM_000227.3:4260	14	NM_001127718.2;XM_011525982.2;NM_198129.2;XM_011525978.2;NM_000227.4;XR_001753199.1;NM_001127717.2;XM_017025743.1;XM_017025744.1;XM_011525980.2;XM_011525979.2;XM_011525981.2	12	NM_001302996.1;NR_130106.1	2
LDHA	LDHA	NM_001165414.1:1690	6	NR_028500.1;NM_005566.4;NM_001165416.1;NM_001165415.1;NM_001165414.1;NM_001135239.1	6		0
MAPK1	MAPK1	NM_138957.2:430	2	NM_002745.4;NM_138957.3	2		0
MAPK3	MAPK3	NM_001040056.1:580	4	NM_002746.3;XR_243293.1;NM_001040056.2;NM_001109891.1	4		0
MIF	MIF	NM_002415.1:319	1	NM_002415.2	1		0
MKI67	MKI67	NM_002417.2:4020	4	XM_011539818.2;XM_006717864.3;NM_001145966.1;NM_002417.5	4		0
MMP1	MMP1	NM_002421.3:1117	2	NM_001145938.1;NM_002421.4	2		0
MMP10	MMP10	NM_002425.1:88	1	NM_002425.3	1		0
MMP12	MMP12	NM_002426.3:769	1	NM_002426.5	1		0
MMP13	MMP13	NM_002427.2:951	1	NM_002427.4	1		0
MMP14	MMP14	NM_004995.2:1470	1	NM_004995.4	1		0
MMP2	MMP2	NM_004530.2:2360	5	NM_001127891.2;NM_001302510.1;NM_001302509.1;NM_004530.6;NM_001302508.1	5		0
MMP28	MMP28	NM_001032278.1:412	17	XM_011525226.2;XM_017025064.1;XM_017025063.1;NM_024302.5;XM_024450943.1;NM_032950.3;XM_011525230.1;NM_001032278.2;XM_011525232.2;XM_011525231.1;XM_017025061.1;NR_111988.1;XM_011525227.1;XM_011525228.1;XM_011525225.1;XM_017025062.1;XM_011525229.2	17		0
MMP3	MMP3	NM_002422.3:25	1	NM_002422.5	1		0
MMP7	MMP7	NM_002423.3:311	1	NM_002423.5	1		0
MMP8	MMP8	NM_002424.2:2590	7	NM_001304441.1;XM_011542835.2;XM_011542836.2;XM_011542834.2;NM_002424.3;XM_017017771.1;NM_001304442.1	7		0
MMP9	MMP9	NM_004994.2:1530	1	NM_004994.3	1		0
MT1A	MT1A	NM_005946.2:0	1	NM_005946.3	1		0
MT2A	MT2A	NM_005953.3:225	1	NM_005953.5	1		0
MYC	MYC	NM_002467.3:1610	2	NM_002467.6;NM_001354870.1	2		0
NF1	NF1	NM_000267.2:1035	3	NM_001128147.2;NM_000267.3;NM_001042492.2	3		0
NGF	NGF	NM_002506.2:634	3	XM_006710663.3;XM_011541518.2;NM_002506.2	3		0
PDGFA	PDGFA	NM_002607.5:2460	8	XM_011515416.1;XM_017012289.1;NM_002607.5;XM_011515415.1;XM_011515419.3;XM_011515417.1;NM_033023.4;XM_011515418.1	8		0
PF4	PF4	NM_002619.2:0	2	NM_002619.3;NM_001363352.1	2		0
PI3	PI3	NM_002638.3:274	1	NM_002638.4	1		0
PI3K	PIK3CA	NM_006218.2:2445	3	XM_011512894.2;XM_006713658.4;NM_006218.4	3		0
PLAT	PLAT	NM_000931.2:1334	3	NM_000930.4;NM_033011.3;NM_001319189.1	3		0
PLAU	PLAU	NM_002658.2:793	4	XM_011539866.2;NM_001145031.2;NM_002658.5;NM_001319191.1	4		0
PLAUR	PLAUR	NM_001005376.2:538	12	XM_011527028.3;XM_011527029.2;XM_017026873.1;NM_002659.4;XM_011527027.2;XM_011527031.3;XM_011527030.2;NM_001301037.1;NM_001005376.2;NM_001005377.2;XM_017026872.2;XM_005258990.5	12		0
POLR1B	POLR1B	NM_019014.3:3320	7	NM_001282777.1;NM_001282774.1;NM_001282772.1;NM_001282779.1;NM_019014.5;NM_001282776.1;NM_001137604.2	7		0
PTEN	PTEN	NM_000314.3:1675	3	NM_001304717.5;NM_001304718.2;NM_000314.7	3		0
PTGS2	PTGS2	NM_000963.1:495	1	NM_000963.4	1		0
RAC1	RAC1	NM_006908.4:500	2	NM_018890.3;NM_006908.5	2		0
RHOA	RHOA	NM_001664.2:1230	7	NM_001313947.1;NM_001313946.1;NM_001313944.1;NM_001313945.1;NM_001313941.1;NM_001313943.1;NM_001664.4	7		0
RPLP0	RPLP0	NM_001002.3:250	2	NM_053275.3;NM_001002.4	2		0
S100A7	S100A7	NM_002963.3:22	1	NM_002963.4	1		0
S100A8	S100A8	NM_002964.3:115	5	NM_001319197.1;NM_001319196.1;NM_001319198.1;NM_001319201.1;NM_002964.5	5		0
S100A9	S100A9	NM_002965.2:75	1	NM_002965.4	1		0
SERPINB3	SERPINB3	NM_006919.2:0	1	NM_006919.2	1		0
SERPINE1	SERPINE1	NM_000602.2:2470	1	NM_000602.4	1		0
SLC30A1	SLC30A1	NM_021194.2:1375	1	NM_021194.3	1		0
SLC39A2	SLC39A2	NM_014579.1:1010	2	NM_014579.4;NM_001256588.1	2		0
SLC39A4	SLC39A4	NM_017767.2:1831	5	NM_001280557.1;NM_017767.2;NM_130849.3;XM_024447188.1	4	XM_024447189.1	1
CuZnSOD	SOD1	NM_000454.4:35	1	NM_000454.4	1		0
STAT3	STAT3	NM_003150.3:2060	13	XM_017024972.1;NM_213662.1;XM_011525146.3;XM_017024974.1;XM_011525145.3;NM_003150.3;XM_017024973.2;NM_139276.2;XM_017024975.1;XM_024450896.1;XM_005257617.3;XM_005257616.4;XM_017024976.1	13		0
TFPI	TFPI	NM_001032281.2:738	13	XM_024453059.1;NM_001032281.3;XM_024453062.1;XM_024453060.1;XM_011511709.3;XM_024453058.1;NM_001329241.1;NM_006287.6;NM_001318941.2;XM_006712720.4;NM_001329239.1;NM_001329240.1;XM_024453061.1	13		0
TGFA	TGFA	NM_003236.2:780	4	NM_001099691.2;NM_001308158.1;NM_001308159.1;NM_003236.4	4		0
TGFB1	TGFB1	NM_000660.3:1260	2	NM_000660.6;XM_011527242.2	2		0
TGFB2	TGFB2	NM_003238.2:1125	4	NR_138148.1;NR_138149.1;NM_001135599.3;NM_003238.5	4		0
TGFBR3	TGFBR3	NM_003243.3:1950	5	NR_036634.1;NM_001195683.1;NM_003243.5;XM_006710867.2;NM_001195684.1	5		0
THBD	THBD	NM_000361.2:1246	1	NM_000361.2	1		0
TIMP-1	TIMP1	NM_003254.2:329	2	NM_003254.3;XM_017029766.2	2		0
TIMP-2	TIMP2	NM_003255.4:1555	1	NM_003255.5	1		0
TIMP-3	TIMP3	NM_000362.4:1640	1	NM_000362.4	1		0
TLR4	TLR4	NM_138554.2:2570	3	NM_138557.2;NM_138554.5;NM_003266.3	3		0
TMPRSS6	TMPRSS6	NM_153609.2:2929	9	XM_024452171.1;XM_024452169.1;NM_001289000.1;XM_011529989.2;XM_024452168.1;XM_024452170.1;NM_153609.3;NM_001289001.1;XM_024452167.1	9		0
TNF	TNF	NM_000594.2:1010	1	NM_000594.4	1		0
VEGFA	VEGFA	NM_001025366.1:1325	20	NM_001171625.1;NM_001204385.1;NM_001171622.1;NM_001025366.2;NM_001171627.1;NM_001317010.1;NM_001025368.2;NM_001171630.1;NM_001287044.1;NM_001171623.1;NM_001171628.1;NM_001033756.2;NM_001204384.1;NM_003376.5;NM_001171624.1;NM_001025369.2;NM_001171626.1;NM_001025370.2;NM_001025367.2;NM_001171629.1	20		0
VTN	VTN	NM_000638.3:1346	1	NM_000638.4	1		0
VWF	VWF	NM_000552.3:8115	1	NM_000552.4	1		0
WAS	WAS	NM_000377.2:90	3	XM_017029786.1;NM_000377.2;XM_011543977.2	3		0
WNT5A	WNT5A	NM_003392.3:475	10	NM_001256105.1;XM_011534088.2;XM_011534085.2;XM_017007127.1;NM_003392.4;XM_006713324.1;XM_011534086.2;XM_011534087.2;XM_011534089.1;XM_017007128.1	10		0

## Sheet: CodeSet Design Approval
	nCounter™ CodeSet Authorization Form
		CodeSet Name:		Gjerdrum_wound
		CodeSet Version:		1
		Quote Number:		SQ-35604
		Customer Institute:		Sjaelland University Hospital - Roskilde
		CodeSet confirmed probe count:		145
		CodeSet confirmed HK count:		6
		Instructions:
	Please fax to 206-378-6288 or email a scan of your approval to cdr@nanostring.com. Thank you.
		I acknowledge that I have reviewed and accept the CodeSet design as specified in this CodeSet Design Report, and I am authorized to approve this design. I understand that after this document has been signed and received by NanoString Technologies, I cannot request changes to this CodeSet; this CodeSet will be synthesized as specified and invoiced upon shipment.
		Considerations When Analyzing Across CodeSets
		Please Note - there can be slight differences in probe binding efficiency between different builds of the same CodeSet. Nanostring recommends either ordering enough reactions of the CodeSet to complete your entire study, or to make sure a common calibrator (reference) sample is run with each new build of the CodeSet. For details, see the Data Analysis Guidelines or contact your Field Applications…
		Normalization / Housekeeping Genes:
			By checking this box, I confirm that I have included Normalization / Housekeeping targets in my gene list and that these are represented in the CodeSet design contained in this report.
		Optional:
			By checking this box, I authorize NanoString Technologies to select an alternate probe sequence in the event that a redesign is necessary due to unforseen QC issues. NanoString Technologies will select a probe of equal quality as a replacement. Selecting this option will ensure prompt delivery of your CodeSet if a redesign is required.
		Authorization:
		Printed Name					Date
		Title
		Signature
	Please fax to 206-378-6288 or email a scan of your approval to cdr@nanostring.com. Thank you.
	NanoString Usage Only Below This Line
		Received By (NanoString) Date					Bioinformatics Approval (NanoString) Date
	Please fax to 206-378-6288 or email a scan of your approval to cdr@nanostring.com. Thank you.
